# Supplementary material for: Pathway-GPS and SIGORA: identifying relevant pathways based on the over-representation of their gene-pair signatures
Source: PeerJ. 2013 Dec 19;1:e229. doi: 10.7717/peerj.229 (PMC3883547; doi:10.7717/peerj.229)
Supplement: Table S1 — The worksheet contains 9 tabs: the list of the input genes, the full results of each of the six compared analysis tools for this data-set, a summarizing 6way-comparison sheet of the ranks of pathways that were identified as significant by at least one method, and an additional tab for DAVID’s functional clusters. [file peerj-01-229-s003.xlsx]

## Sheet: GSEA
NAME	GS<br> follow link to MSigDB	GS DETAILS	SIZE	ES	NES	NOM p-val	FDR q-val	FWER p-val	RANK AT MAX	LEADING EDGE
KEGG_SMALL_CELL_LUNG_CANCER	KEGG_SMALL_CELL_LUNG_CANCER	Details ...	82	0.55992	1.8186	0	0.0444994	0.031	2874	tags=32%, list=14%, signal=37%
KEGG_RIG_I_LIKE_RECEPTOR_SIGNALING_PATHWAY	KEGG_RIG_I_LIKE_RECEPTOR_SIGNALING_PATHWAY	Details ...	65	0.628824	1.76753	0.00196464	0.0468076	0.064	1964	tags=31%, list=10%, signal=34%
KEGG_PATHWAYS_IN_CANCER	KEGG_PATHWAYS_IN_CANCER	Details ...	315	0.421732	1.66395	0	0.0528885	0.234	2994	tags=24%, list=15%, signal=28%
KEGG_JAK_STAT_SIGNALING_PATHWAY	KEGG_JAK_STAT_SIGNALING_PATHWAY	Details ...	151	0.580354	1.6821	0.00197628	0.0554969	0.201	2057	tags=26%, list=10%, signal=28%
KEGG_HYPERTROPHIC_CARDIOMYOPATHY_HCM	KEGG_HYPERTROPHIC_CARDIOMYOPATHY_HCM	Details ...	82	0.449157	1.67065	0	0.0557793	0.222	1801	tags=11%, list=9%, signal=12%
KEGG_PRION_DISEASES	KEGG_PRION_DISEASES	Details ...	35	0.651068	1.65254	0.00788955	0.0560864	0.263	1910	tags=23%, list=9%, signal=25%
KEGG_NOTCH_SIGNALING_PATHWAY	KEGG_NOTCH_SIGNALING_PATHWAY	Details ...	41	0.569855	1.6907	0	0.0581185	0.184	2916	tags=32%, list=14%, signal=37%
KEGG_MAPK_SIGNALING_PATHWAY	KEGG_MAPK_SIGNALING_PATHWAY	Details ...	256	0.410635	1.69211	0.00194175	0.0691358	0.182	1807	tags=16%, list=9%, signal=18%
KEGG_CYTOSOLIC_DNA_SENSING_PATHWAY	KEGG_CYTOSOLIC_DNA_SENSING_PATHWAY	Details ...	51	0.693268	1.71424	0	0.074779	0.137	1896	tags=37%, list=9%, signal=41%
KEGG_TOLL_LIKE_RECEPTOR_SIGNALING_PATHWAY	KEGG_TOLL_LIKE_RECEPTOR_SIGNALING_PATHWAY	Details ...	98	0.641568	1.60984	0	0.0769156	0.356	2874	tags=40%, list=14%, signal=46%
KEGG_TGF_BETA_SIGNALING_PATHWAY	KEGG_TGF_BETA_SIGNALING_PATHWAY	Details ...	82	0.482396	1.6161	0.00798403	0.077359	0.342	2320	tags=21%, list=11%, signal=23%
KEGG_CYTOKINE_CYTOKINE_RECEPTOR_INTERACTION	KEGG_CYTOKINE_CYTOKINE_RECEPTOR_INTERACTION	Details ...	245	0.663015	1.69863	0	0.0779975	0.173	1150	tags=25%, list=6%, signal=26%
KEGG_BASAL_TRANSCRIPTION_FACTORS	KEGG_BASAL_TRANSCRIPTION_FACTORS	Details ...	33	0.558636	1.59949	0.0163599	0.0804937	0.376	4059	tags=48%, list=20%, signal=60%
KEGG_HEMATOPOIETIC_CELL_LINEAGE	KEGG_HEMATOPOIETIC_CELL_LINEAGE	Details ...	83	0.6063	1.58068	0	0.091453	0.422	2063	tags=28%, list=10%, signal=31%
KEGG_APOPTOSIS	KEGG_APOPTOSIS	Details ...	82	0.646223	1.5721	0	0.0934802	0.443	1846	tags=33%, list=9%, signal=36%
KEGG_PROSTATE_CANCER	KEGG_PROSTATE_CANCER	Details ...	87	0.441386	1.56536	0.00387597	0.0945954	0.46	4072	tags=39%, list=20%, signal=48%
KEGG_FOCAL_ADHESION	KEGG_FOCAL_ADHESION		188	0.373314	1.537	0.0114068	0.100343	0.548	3831	tags=29%, list=19%, signal=35%
KEGG_VEGF_SIGNALING_PATHWAY	KEGG_VEGF_SIGNALING_PATHWAY	Details ...	71	0.432427	1.54147	0.010142	0.100957	0.536	2874	tags=24%, list=14%, signal=28%
KEGG_NEUROTROPHIN_SIGNALING_PATHWAY	KEGG_NEUROTROPHIN_SIGNALING_PATHWAY	Details ...	122	0.470255	1.55427	0	0.102678	0.496	3394	tags=35%, list=16%, signal=42%
KEGG_NOD_LIKE_RECEPTOR_SIGNALING_PATHWAY	KEGG_NOD_LIKE_RECEPTOR_SIGNALING_PATHWAY	Details ...	51	0.784606	1.54776	0	0.103894	0.515	1606	tags=47%, list=8%, signal=51%
KEGG_BLADDER_CANCER	KEGG_BLADDER_CANCER	Details ...	40	0.52072	1.54318	0.0135135	0.104061	0.529	4037	tags=45%, list=20%, signal=56%
KEGG_TYPE_I_DIABETES_MELLITUS	KEGG_TYPE_I_DIABETES_MELLITUS		40	0.715475	1.51624	0.00814664	0.107425	0.601	786	tags=18%, list=4%, signal=18%
KEGG_FC_EPSILON_RI_SIGNALING_PATHWAY	KEGG_FC_EPSILON_RI_SIGNALING_PATHWAY		75	0.502321	1.5128	0.00203666	0.107533	0.608	3244	tags=32%, list=16%, signal=38%
KEGG_O_GLYCAN_BIOSYNTHESIS	KEGG_O_GLYCAN_BIOSYNTHESIS		29	0.470836	1.50864	0.0228571	0.108721	0.62	1406	tags=17%, list=7%, signal=18%
KEGG_P53_SIGNALING_PATHWAY	KEGG_P53_SIGNALING_PATHWAY		64	0.557419	1.51834	0.0164271	0.109323	0.6	2295	tags=28%, list=11%, signal=32%
KEGG_CHEMOKINE_SIGNALING_PATHWAY	KEGG_CHEMOKINE_SIGNALING_PATHWAY		173	0.542176	1.49411	0.0142276	0.112923	0.654	3001	tags=30%, list=15%, signal=35%
KEGG_GRAFT_VERSUS_HOST_DISEASE	KEGG_GRAFT_VERSUS_HOST_DISEASE		37	0.7429	1.49952	0.00819672	0.113466	0.637	786	tags=19%, list=4%, signal=20%
KEGG_COMPLEMENT_AND_COAGULATION_CASCADES	KEGG_COMPLEMENT_AND_COAGULATION_CASCADES		66	0.567606	1.51844	0.0257426	0.11401	0.6	2483	tags=27%, list=12%, signal=31%
KEGG_ASTHMA	KEGG_ASTHMA		27	0.664147	1.49529	0.0121457	0.114885	0.65	2100	tags=26%, list=10%, signal=29%
KEGG_ERBB_SIGNALING_PATHWAY	KEGG_ERBB_SIGNALING_PATHWAY		85	0.390606	1.52144	0.0118577	0.114937	0.592	3014	tags=25%, list=15%, signal=29%
KEGG_ADIPOCYTOKINE_SIGNALING_PATHWAY	KEGG_ADIPOCYTOKINE_SIGNALING_PATHWAY		66	0.516983	1.48123	0.0200803	0.121843	0.688	1796	tags=21%, list=9%, signal=23%
KEGG_T_CELL_RECEPTOR_SIGNALING_PATHWAY	KEGG_T_CELL_RECEPTOR_SIGNALING_PATHWAY		107	0.547464	1.48255	0.0142857	0.124275	0.687	3373	tags=41%, list=16%, signal=49%
KEGG_THYROID_CANCER	KEGG_THYROID_CANCER		29	0.523278	1.4686	0.0120482	0.132762	0.713	4037	tags=41%, list=20%, signal=51%
KEGG_ENDOMETRIAL_CANCER	KEGG_ENDOMETRIAL_CANCER		51	0.474595	1.4543	0.00594059	0.146602	0.736	3329	tags=35%, list=16%, signal=42%
KEGG_EPITHELIAL_CELL_SIGNALING_IN_HELICOBACTER_PYLORI_INFECTION	KEGG_EPITHELIAL_CELL_SIGNALING_IN_HELICOBACTER_PYLORI_INFECTION		62	0.570645	1.44289	0.029703	0.153627	0.751	3230	tags=39%, list=16%, signal=46%
KEGG_FOLATE_BIOSYNTHESIS	KEGG_FOLATE_BIOSYNTHESIS		10	0.700892	1.44339	0.0525292	0.15732	0.749	743	tags=30%, list=4%, signal=31%
KEGG_ENDOCYTOSIS	KEGG_ENDOCYTOSIS		157	0.408071	1.4358	0.0281125	0.158936	0.768	2542	tags=24%, list=12%, signal=27%
KEGG_GLIOMA	KEGG_GLIOMA		63	0.362556	1.42478	0.019685	0.170935	0.784	4037	tags=33%, list=20%, signal=41%
KEGG_TIGHT_JUNCTION	KEGG_TIGHT_JUNCTION		125	0.35679	1.41201	0.0298211	0.186447	0.803	3116	tags=24%, list=15%, signal=28%
KEGG_GNRH_SIGNALING_PATHWAY	KEGG_GNRH_SIGNALING_PATHWAY		97	0.314514	1.40121	0.0331384	0.198532	0.823	2798	tags=16%, list=14%, signal=19%
KEGG_TYPE_II_DIABETES_MELLITUS	KEGG_TYPE_II_DIABETES_MELLITUS		44	0.451477	1.39187	0.0780287	0.199013	0.836	1025	tags=9%, list=5%, signal=10%
KEGG_RENAL_CELL_CARCINOMA	KEGG_RENAL_CELL_CARCINOMA		69	0.420881	1.38401	0.0884086	0.199757	0.843	3952	tags=38%, list=19%, signal=46%
KEGG_NATURAL_KILLER_CELL_MEDIATED_CYTOTOXICITY	KEGG_NATURAL_KILLER_CELL_MEDIATED_CYTOTOXICITY		129	0.455079	1.38116	0.0546218	0.199883	0.847	3394	tags=31%, list=16%, signal=37%
KEGG_LEISHMANIA_INFECTION	KEGG_LEISHMANIA_INFECTION		62	0.664765	1.38539	0.0544355	0.201763	0.842	2080	tags=34%, list=10%, signal=38%
KEGG_SYSTEMIC_LUPUS_ERYTHEMATOSUS	KEGG_SYSTEMIC_LUPUS_ERYTHEMATOSUS		107	0.431799	1.39316	0.0709939	0.202016	0.836	4613	tags=32%, list=22%, signal=41%
KEGG_INTESTINAL_IMMUNE_NETWORK_FOR_IGA_PRODUCTION	KEGG_INTESTINAL_IMMUNE_NETWORK_FOR_IGA_PRODUCTION		45	0.587954	1.39605	0.0630081	0.202255	0.833	1076	tags=18%, list=5%, signal=19%
KEGG_ACUTE_MYELOID_LEUKEMIA	KEGG_ACUTE_MYELOID_LEUKEMIA		56	0.530502	1.37548	0.0599174	0.20408	0.852	2874	tags=34%, list=14%, signal=39%
KEGG_ALLOGRAFT_REJECTION	KEGG_ALLOGRAFT_REJECTION		34	0.69306	1.38612	0.0693878	0.204713	0.841	1076	tags=21%, list=5%, signal=22%
KEGG_SPHINGOLIPID_METABOLISM	KEGG_SPHINGOLIPID_METABOLISM		30	0.485295	1.3616	0.0841683	0.217484	0.87	2232	tags=17%, list=11%, signal=19%
KEGG_GLYCOSYLPHOSPHATIDYLINOSITOL_GPI_ANCHOR_BIOSYNTHESIS	KEGG_GLYCOSYLPHOSPHATIDYLINOSITOL_GPI_ANCHOR_BIOSYNTHESIS		24	0.550125	1.35415	0.104536	0.217902	0.884	2967	tags=38%, list=14%, signal=44%
KEGG_DILATED_CARDIOMYOPATHY	KEGG_DILATED_CARDIOMYOPATHY		89	0.343916	1.35865	0.05	0.218481	0.873	831	tags=6%, list=4%, signal=6%
KEGG_ALPHA_LINOLENIC_ACID_METABOLISM	KEGG_ALPHA_LINOLENIC_ACID_METABOLISM		17	0.497499	1.35582	0.125	0.218761	0.879	1304	tags=18%, list=6%, signal=19%
KEGG_VIRAL_MYOCARDITIS	KEGG_VIRAL_MYOCARDITIS		67	0.461703	1.36224	0.108163	0.220719	0.87	5061	tags=49%, list=25%, signal=65%
KEGG_ETHER_LIPID_METABOLISM	KEGG_ETHER_LIPID_METABOLISM		28	0.471327	1.34118	0.135688	0.235699	0.898	1782	tags=21%, list=9%, signal=23%
KEGG_MTOR_SIGNALING_PATHWAY	KEGG_MTOR_SIGNALING_PATHWAY		46	0.391881	1.3364	0.075	0.240578	0.903	2874	tags=28%, list=14%, signal=33%
KEGG_PPAR_SIGNALING_PATHWAY	KEGG_PPAR_SIGNALING_PATHWAY		66	0.445832	1.33	0.109162	0.243308	0.91	1730	tags=20%, list=8%, signal=21%
KEGG_UBIQUITIN_MEDIATED_PROTEOLYSIS	KEGG_UBIQUITIN_MEDIATED_PROTEOLYSIS		122	0.45641	1.3306	0.0572597	0.24648	0.91	4182	tags=36%, list=20%, signal=45%

## Sheet: GSEA_AF
Pathway Name	NES	ES	NP	FDR
KEGG_BLADDER_CANCER	1.6686395 ES	0.623047	0.00821355	0.0449158
KEGG_PROSTATE_CANCER	1.6728139 ES	0.434083	0.0019802	0.0463676
KEGG_THYROID_CANCER	1.6743714 ES	0.479375	0.00996016	0.0485352
KEGG_HYPERTROPHIC_CARDIOMYOPATHY_HCM	1.6946346 ES	0.390231	0	0.0524487
KEGG_P53_SIGNALING_PATHWAY	1.6746739 ES	0.528264	0.00199601	0.0524738
KEGG_AMYOTROPHIC_LATERAL_SCLEROSIS_ALS	1.6347464 ES	0.458912	0.00396825	0.052535
KEGG_SMALL_CELL_LUNG_CANCER	1.9436296 ES	0.482212	0	0.0547616
KEGG_HEMATOPOIETIC_CELL_LINEAGE	1.6362464 ES	0.501554	0	0.0548096
KEGG_COMPLEMENT_AND_COAGULATION_CASCADES	1.6403416 ES	0.475458	0.00204082	0.0557061
KEGG_VEGF_SIGNALING_PATHWAY	1.683619 ES	0.481745	0	0.0568129
KEGG_CYTOSOLIC_DNA_SENSING_PATHWAY	1.6748973 ES	0.735017	0	0.05715
KEGG_PRION_DISEASES	1.8106555 ES	0.560617	0	0.0579351
KEGG_ADIPOCYTOKINE_SIGNALING_PATHWAY	1.6950108 ES	0.458422	0	0.0585848
KEGG_NOTCH_SIGNALING_PATHWAY	1.710308 ES	0.450474	0.00210084	0.0595643
KEGG_CYTOKINE_CYTOKINE_RECEPTOR_INTERACTION	1.7699733 ES	0.562454	0	0.0613587
KEGG_APOPTOSIS	1.7231532 ES	0.6187	0	0.0615155
KEGG_TGF_BETA_SIGNALING_PATHWAY	1.7417508 ES	0.433059	0	0.0619722
KEGG_NEUROTROPHIN_SIGNALING_PATHWAY	1.599246 ES	0.38396	0	0.0663045
KEGG_TOLL_LIKE_RECEPTOR_SIGNALING_PATHWAY	1.5935652 ES	0.631479	0	0.0674387
KEGG_ACUTE_MYELOID_LEUKEMIA	1.6013459 ES	0.4835	0.0242424	0.0678124
KEGG_NOD_LIKE_RECEPTOR_SIGNALING_PATHWAY	1.5735779 ES	0.729152	0	0.070864
KEGG_ENDOMETRIAL_CANCER	1.5839756 ES	0.502368	0.00824742	0.0715585
KEGG_TYPE_I_DIABETES_MELLITUS	1.5779822 ES	0.624593	0.031746	0.0729084
KEGG_ECM_RECEPTOR_INTERACTION	1.5735834 ES	0.443472	0.00616016	0.0738167
KEGG_EPITHELIAL_CELL_SIGNALING_IN_HELICOBACTER_PYLORI_INFECTION	1.5514157 ES	0.525062	0.0203252	0.0754531
KEGG_DILATED_CARDIOMYOPATHY	1.5530156 ES	0.347922	0.00200401	0.0769101
KEGG_CHRONIC_MYELOID_LEUKEMIA	1.555023 ES	0.420282	0.0180723	0.0779851
KEGG_T_CELL_RECEPTOR_SIGNALING_PATHWAY	1.559066 ES	0.51443	0.00400802	0.0784078
KEGG_RIG_I_LIKE_RECEPTOR_SIGNALING_PATHWAY	1.8174841 ES	0.659323	0	0.0818779
KEGG_MTOR_SIGNALING_PATHWAY	1.5372763 ES	0.4689	0.0177165	0.0826029
KEGG_PANCREATIC_CANCER	1.5204699 ES	0.53487	0.00988142	0.0945359
KEGG_FATTY_ACID_METABOLISM	1.485863 ES	0.514703	0.0243408	0.12723
KEGG_TRYPTOPHAN_METABOLISM	1.4731625 ES	0.508638	0.040404	0.129371
KEGG_ASTHMA	1.4456652 ES	0.628726	0.0584677	0.129469
KEGG_VIRAL_MYOCARDITIS	1.4509819 ES	0.461083	0.0632411	0.129574
KEGG_VALINE_LEUCINE_AND_ISOLEUCINE_BIOSYNTHESIS	1.4469535 ES	0.630175	0.0404858	0.130913
KEGG_ALPHA_LINOLENIC_ACID_METABOLISM	1.4525226 ES	0.485529	0.0792079	0.13093
KEGG_INTESTINAL_IMMUNE_NETWORK_FOR_IGA_PRODUCTION	1.4365518 ES	0.534107	0.0333988	0.131184
KEGG_CELL_ADHESION_MOLECULES_CAMS	1.4407814 ES	0.352686	0.0253411	0.132453
KEGG_RENAL_CELL_CARCINOMA	1.474008 ES	0.346474	0.00858369	0.132502
KEGG_JAK_STAT_SIGNALING_PATHWAY	1.4768537 ES	0.425735	0.0384615	0.132857
KEGG_ETHER_LIPID_METABOLISM	1.4534013 ES	0.54862	0.0526316	0.133075
KEGG_SPHINGOLIPID_METABOLISM	1.4369153 ES	0.454858	0.0420842	0.133637
KEGG_PANTOTHENATE_AND_COA_BIOSYNTHESIS	1.4624285 ES	0.534344	0.0304878	0.134195
KEGG_VIBRIO_CHOLERAE_INFECTION	1.4555455 ES	0.497827	0.0555556	0.13435
KEGG_CHEMOKINE_SIGNALING_PATHWAY	1.425845 ES	0.44033	0.0303644	0.135059
KEGG_COLORECTAL_CANCER	1.4647208 ES	0.428514	0.0301205	0.135099
KEGG_PROTEIN_EXPORT	1.4193302 ES	0.660225	0.0448065	0.135838
KEGG_GRAFT_VERSUS_HOST_DISEASE	1.4568814 ES	0.654982	0.0610998	0.136508
KEGG_GLYOXYLATE_AND_DICARBOXYLATE_METABOLISM	1.4267644 ES	0.47097	0.0571429	0.13671
KEGG_UBIQUITIN_MEDIATED_PROTEOLYSIS	1.429057 ES	0.393277	0.044	0.137428
KEGG_SYSTEMIC_LUPUS_ERYTHEMATOSUS	1.4196346 ES	0.453729	0.0724346	0.138221
KEGG_ALLOGRAFT_REJECTION	1.4100155 ES	0.667725	0.0734694	0.143582
KEGG_NON_SMALL_CELL_LUNG_CANCER	1.3933842 ES	0.338172	0.0281955	0.159089
KEGG_GLYCEROLIPID_METABOLISM	1.384416 ES	0.414346	0.0742188	0.167586
KEGG_WNT_SIGNALING_PATHWAY	1.3812134 ES	0.310889	0.0277778	0.168857
KEGG_GLIOMA	1.372441 ES	0.39345	0.0419287	0.169799
KEGG_RNA_DEGRADATION	1.3748051 ES	0.445071	0.0571429	0.170074
KEGG_FC_EPSILON_RI_SIGNALING_PATHWAY	1.3770665 ES	0.424073	0.0314342	0.170572
KEGG_LEISHMANIA_INFECTION	1.3637823 ES	0.591803	0.0945674	0.17474
KEGG_GLYCOSYLPHOSPHATIDYLINOSITOL_GPI_ANCHOR_BIOSYNTHESIS	1.364348 ES	0.384054	0.0910931	0.177017
KEGG_SPLICEOSOME	1.3563322 ES	0.521401	0.10664	0.181415
KEGG_NATURAL_KILLER_CELL_MEDIATED_CYTOTOXICITY	1.35166 ES	0.462825	0.108163	0.184095
KEGG_TIGHT_JUNCTION	1.3389697 ES	0.275079	0.0434783	0.196665
KEGG_HOMOLOGOUS_RECOMBINATION	1.3326072 ES	0.421982	0.085595	0.201421
KEGG_ARRHYTHMOGENIC_RIGHT_VENTRICULAR_CARDIOMYOPATHY_ARVC	1.3222187 ES	0.323123	0.0858283	0.211848
KEGG_INSULIN_SIGNALING_PATHWAY	1.3195593 ES	0.323969	0.0828402	0.212174
KEGG_PATHOGENIC_ESCHERICHIA_COLI_INFECTION	1.3052737 ES	0.492779	0.161554	0.222299
KEGG_GLYCEROPHOSPHOLIPID_METABOLISM	1.3058636 ES	0.322752	0.0813008	0.224576
KEGG_ANTIGEN_PROCESSING_AND_PRESENTATION	1.3072605 ES	0.498578	0.172764	0.225784
KEGG_PROGESTERONE_MEDIATED_OOCYTE_MATURATION	1.293146 ES	0.323786	0.0992063	0.22996
KEGG_O_GLYCAN_BIOSYNTHESIS	1.2975353 ES	0.312687	0.0545455	0.230339
KEGG_PPAR_SIGNALING_PATHWAY	1.2947286 ES	0.353843	0.139442	0.231118
KEGG_PROTEASOME	1.2861091 ES	0.609637	0.193018	0.23756

## Sheet: SIGORA
pwyname	p_value	Bonferroni	FDR	success	m	N-m	k	PUGs	genes in Present GPS
Cytokine-cytokine receptor interaction	2.018e-146	4.52e-144	4.52e-144	428	12295	221260	1903	IL17RA;TNFSF9;TNFSF15;TNFSF8;TNFRSF4;TNFRSF9	IL17RA;LIF;OSM;IL6;INHBA;IL7R;TNFSF9;IL21R;IL8;CXCL6;CXCL1;HGF;CXCL3;CXCL2;CXCL10;CXCL11;CCR2;TSLP;MET;IL15;CCL2;CCL7;CCL8;CCL1;CSF2;CCL5;CCL15;CCL23;CCL18;CCL3;CCL4;CCL3L1;CSF3;IL15RA;IL2RA;IL12B;IL1R1;TNFSF10;IL1A;IL1B;IL18;ACVR2A;TNFSF15;TNFSF8;CCL20;TNFRSF4;TNFRSF9;VEGFA;CSF1;IL10;IL19;IL24;CCL14;TNF
NOD-like receptor signaling pathway	4.283e-80	9.594e-78	4.797e-78	88	617	232938	1903	NLRC4;CASP5;TNFAIP3;NLRP3;NAIP	NFKBIA;IL6;IL8;CXCL1;CXCL2;RIPK2;PYCARD;NFKB1;CCL2;CCL7;CCL8;CCL5;NLRC4;RELA;IL1B;BIRC3;CASP5;CASP1;IL18;XIAP;TNFAIP3;TAB2;NLRP3;TNF;NAIP
MAPK signaling pathway	7.123e-27	1.596e-24	5.319e-25	204	11128	222427	1903	MAPK6;DUSP4;MEF2C;DUSP7;TAOK1;RAPGEF2;DUSP1;DUSP2;DUSP5	PPP3CC;MAPK6;DUSP4;PRKCB;MAP2K7;NFKB1;MEF2C;MYC;MAP2K3;DUSP7;TAOK1;RAPGEF2;RASGRP3;BRAF;RPS6KA3;RELA;DUSP1;DUSP2;IL1R1;PAK1;IL1A;IL1B;MAP3K8;ZAK;GADD45G;NFKB2;DUSP5;TAB2;MAP3K4;JUN;PLA2G4A;AKT3;NRAS;TNF
RIG-I-like receptor signaling pathway	5.464e-23	1.224e-20	3.06e-21	40	666	232889	1903	AZI2;DHX58;IFIH1;ISG15;DDX3X	NFKBIA;IRF7;AZI2;IL8;CXCL10;NFKB1;DHX58;DDX58;IL12B;RELA;IFIH1;ISG15;DDX3X;TNF
Hepatitis C	7.936e-20	1.778e-17	3.555e-18	51	1335	232220	1903	OAS1;OAS3;OAS2;IFIT1	NFKBIA;PPP2CB;IRF7;IL8;PIK3R5;NFKB1;BRAF;EIF2AK2;DDX58;RELA;OAS1;OAS3;OAS2;SOCS3;IFIT1;CDKN1A;NRAS;AKT3;TNF
B cell receptor signaling pathway	6.556e-11	1.468e-08	2.448e-09	18	332	233223	1903	CD79B;PIK3AP1	NFKBIA;PPP3CC;PRKCB;PIK3R5;NFKB1;NFATC3;RASGRP3;RELA;CD79B;BLNK;PIK3AP1;JUN;AKT3;NRAS
Toll-like receptor signaling pathway	1.017e-10	2.278e-08	3.254e-09	25	663	232892	1903	TLR7	NFKBIA;IL6;IRF7;IL8;MAP2K7;CXCL10;CXCL11;PIK3R5;NFKB1;MAP2K3;TLR2;CCL5;CCL3;CCL4;TLR7;CD80;IL12B;MAP3K8;TAB2;JUN;RELA;IL1B;AKT3;TNF
Jak-STAT signaling pathway	1.229e-09	2.753e-07	3.441e-08	47	2168	231387	1903	SPRED2;STAT4	LIF;OSM;IL6;SOCS1;IL7R;IL21R;PIK3R5;MYC;TSLP;IL15;CSF2;CSF3;IL15RA;IL2RA;SPRED2;IL12B;SOCS3;CBL;STAT4;IL19;IL24;AKT3;IL10
Osteoclast differentiation	3.347e-09	7.498e-07	8.33e-08	43	1949	231606	1903	JUNB;FOSL2	NFKBIA;PPP3CC;SOCS1;MAP2K7;PIK3R5;JUNB;NFKB1;FOSL2;LCP2;RELA;FOSL1;IL1R1;IL1A;IL1B;SOCS3;BLNK;NFKB2;FYN;TAB2;JUN;CSF1;AKT3;TNF
Fc gamma R-mediated phagocytosis	3.34e-07	7.481e-05	7.482e-06	20	680	232875	1903	MYO10;MARCKS	MYO10;PRKCB;DNM1L;ASAP2;PIK3R5;ASAP1;PLD1;PAK1;SPHK1;MARCKS;PLA2G4A;AKT3
ErbB signaling pathway	9.985e-07	0.0002237	2.033e-05	14	387	233168	1903	EREG	PRKCB;MAP2K7;EREG;PIK3R5;MYC;BRAF;HBEGF;PAK1;SRC;CBL;CDKN1A;JUN;ABL2;AKT3;NRAS
Amoebiasis	1.731e-06	0.0003878	3.231e-05	22	883	232672	1903	SERPINB2;SERPINB9	SERPINB2;IL6;PRKCB;IL8;CXCL1;PIK3R5;NFKB1;CSF2;TLR2;IL12B;SERPINB9;RELA;COL1A1;IL1R1;IL1B;IL10;TNF
Endocytosis	8.388e-06	0.001879	0.0001445	129	10775	222780	1903	VPS37A;PSD3;RAB11FIP1;DAB2;EHD1;RAB22A;DNAJC6;SH3GLB1;ARFGAP3	NEDD4L;VPS37A;PSD3;RAB11FIP1;DAB2;PML;DNM1L;ASAP2;ASAP1;MET;IL2RA;EHD1;AP2A1;PLD1;ITCH;SRC;CBL;RAB22A;DNAJC6;SH3GLB1;ARFGAP3
Chemokine signaling pathway	2.803e-05	0.006278	0.0004485	57	3995	229560	1903	FGR	NFKBIA;PRKCB;IL8;CXCL6;CXCL1;CXCL3;CXCL2;CXCL10;CXCL11;PIK3R5;CCR2;NFKB1;CCL2;CCL7;CCL8;CCL1;CCL5;CCL15;CCL23;CCL18;CCL3;CCL4;CCL3L1;BRAF;RELA;PAK1;CCL20;FGR;FOXO3;AKT3;CCL14;NRAS
Allograft rejection	8.253e-05	0.01849	0.001232	15	630	232925	1903	CD80;IL12B;IL10;TNF;HLA-DPA1	CD80;IL12B;IL10;TNF;HLA-DPA1
Chagas disease (American trypanosomiasis)	0.0001007	0.02256	0.00141	10	329	233226	1903		NFKBIA;IL6;PPP2CB;IL8;PIK3R5;NFKB1;SERPINE1;CCL2;TLR2;CCL5;CCL3;CCL3L1;IL12B;CFLAR;IL1B;IL10;RELA;JUN;AKT3;TNF
MTOR signaling pathway	0.0001649	0.03693	0.002173	9	291	233264	1903	DDIT4	PIK3R5;EIF4E;ULK2;BRAF;RHEB;RPS6KA3;DDIT4;VEGFA;AKT3
Amyotrophic lateral sclerosis (ALS)	0.0001901	0.04258	0.002366	10	354	233201	1903	SLC1A2;ALS2	BID;PPP3CC;MAP2K3;SLC1A2;CASP1;ALS2;TNF
Apoptosis	0.0004938	0.1106	0.005822	14	668	232887	1903		BID;NFKBIA;PPP3CC;IRAK2;NFKB1;IRAK3;RELA;IL1R1;TNFSF10;IL1A;BIRC3;CFLAR;CAPN2;XIAP;IL1B;TNF;AKT3
Mucin type O-Glycan biosynthesis	0.0007408	0.1659	0.008297	2	22	233533	1903	B4GALT5	GALNT5;B4GALT5
Viral myocarditis	0.001001	0.2242	0.01068	9	367	233188	1903	CXADR	CXADR;BID;ICAM1;CD80;FYN;ABL2;CD55;HLA-DPA1
Fructose and mannose metabolism	0.001127	0.2524	0.01147	6	193	233362	1903	PFKFB3;MTMR2;PFKFB2	PFKFB3;MTMR2;PFKFB2
Terpenoid backbone biosynthesis	0.00186	0.4167	0.01811	2	30	233525	1903	PDSS1	HMGCS1;PDSS1
Endometrial cancer	0.002859	0.6404	0.02562	1	10	233545	1903		MYC;PTEN;TCF7L2;FOXO3
D-Glutamine and D-glutamate metabolism	0.002859	0.6404	0.02562	1	10	233545	1903	GLS	GLS
Malaria	0.003651	0.8177	0.03145	6	238	233317	1903		THBS1;IL6;IL8;CD36;HGF;ICAM1;MET;CCL2;TLR2;CSF3;IL1B;IL18;SDC4;IL10;TNF
Nicotinate and nicotinamide metabolism	0.004571	1	0.03792	2	41	233514	1903	NAMPT	CD38;NT5C3;NAMPT
Epithelial cell signaling in Helicobacter pylori infection	0.005749	1	0.04599	6	259	233296	1903		NFKBIA;ATP6V1H;IL8;CXCL1;ADAM17;NFKB1;MET;CCL5;HBEGF;RELA;SRC;PAK1;JUN
Cell adhesion molecules (CAMs)	0.006804	1	0.05089	43	3620	229935	1903	CD226;CNTNAP2;CD274;ALCAM;CD58;MPZL1	CD226;ITGB8;ICAM1;CNTNAP2;CD274;ALCAM;CD80;ITGAV;SDC4;CD58;MPZL1;HLA-DPA1
Complement and coagulation cascades	0.006815	1	0.05089	20	1406	232149	1903	PLAUR;THBD;TFPI;F3	SERPINE1;PLAUR;THBD;TFPI;F3;CD55;CFB
Glycosaminoglycan biosynthesis - chondroitin sulfate	0.01169	1	0.08447	3	107	233448	1903	CHST7	CHST13;CHST7;B3GALT6
African trypanosomiasis	0.019	1	0.133	2	69	233486	1903		IL6;IDO1;PRKCB;ICAM1;IL12B;IL1B;IL18;IL10;TNF
Beta-Alanine metabolism	0.02226	1	0.1511	3	130	233425	1903	UPB1;SMS	UPB1;SMS
Phagosome	0.03203	1	0.211	35	3170	230385	1903	CLEC7A;STX12	TUBB6;THBS1;CLEC7A;OLR1;ATP6V1H;CD36;TLR2;TUBB2A;FCAR;ITGAV;VAMP3;STX12;STX7;HLA-DPA1
Synthesis and degradation of ketone bodies	0.03661	1	0.2343	1	37	233518	1903	HMGCS1	HMGCS1
Glycerolipid metabolism	0.0403	1	0.2471	1	39	233516	1903		LPL;AGK;MGLL
VEGF signaling pathway	0.04082	1	0.2471	2	93	233462	1903		PPP3CC;NFATC3;SPHK1;SRC;VEGFA;PTGS2;PLA2G4A;NRAS
Glycosaminoglycan biosynthesis - keratan sulfate	0.05425	1	0.3198	1	46	233509	1903	CHST2	CHST2
TGF-beta signaling pathway	0.0657	1	0.3774	15	1285	232270	1903	ID2;ID3	THBS1;INHBA;PPP2CB;ID2;MYC;CDKN2B;ACVR2A;ID3;TNF
Prostate cancer	0.07112	1	0.3929	2	117	233438	1903		NFKBIA;CREB5;NKX3-1;PIK3R5;NFKB1;BRAF;RELA;PTEN;CDKN1A;TCF7L2;AKT3;NRAS
Non-homologous end-joining	0.07191	1	0.3929	1	54	233501	1903	LIG4	LIG4
P53 signaling pathway	0.08093	1	0.4316	12	1025	232530	1903	PMAIP1;STEAP3	BID;PMAIP1;THBS1;SERPINE1;STEAP3;GADD45G;PTEN;CDKN1A
Cytosolic DNA-sensing pathway	0.0835	1	0.435	4	283	233272	1903		IL6;IRF7;CXCL10;PYCARD;CCL5;CCL4;DDX58;CASP1;IL18;IL1B
Leishmaniasis	0.1143	1	0.5819	1	71	233484	1903		PRKCB;TLR2;IL12B;IL1A;IL1B;TAB2;JUN;PTGS2;HLA-DPA1;IL10;TNF
Toxoplasmosis	0.1255	1	0.611	6	509	233046	1903		NFKBIA;CIITA;SOCS1;PIK3R5;MAP2K3;TLR2;IL12B;BIRC3;XIAP;PLA2G4A;AKT3;NFKB1;RELA;TAB2;IL10;HLA-DPA1
Vibrio cholerae infection	0.127	1	0.611	3	235	233320	1903	KDELR2	KDELR2;PRKCB;ATP6V1H;TJP2
Nitrogen metabolism	0.1282	1	0.611	2	152	233403	1903	CA13	CA13;GLS;GLUL
Glycosaminoglycan biosynthesis - heparan sulfate	0.1337	1	0.6239	2	155	233400	1903	HS3ST3B1	HS3ST3B1;B3GALT6
Notch signaling pathway	0.1438	1	0.6574	8	727	232828	1903	NUMB;JAG1	PSEN1;NUMB;ADAM17;JAG1;HES1
Homologous recombination	0.1473	1	0.6599	3	249	233306	1903	NBN;XRCC2	NBN;XRCC2
Amino sugar and nucleotide sugar metabolism	0.1728	1	0.759	4	360	233195	1903	PGM3	GFPT1;UXS1;PGM3;UAP1;HEXA
Sphingolipid metabolism	0.1843	1	0.7939	2	181	233374	1903	SGPP2	SGMS2;SPHK1;SGPP2
Primary immunodeficiency	0.1966	1	0.8309	2	187	233368	1903		CIITA;IL7R;ADA;BLNK
Thyroid cancer	0.2028	1	0.8353	3	284	233271	1903	NRAS	MYC;BRAF;TCF7L2;NRAS
Fc epsilon RI signaling pathway	0.2051	1	0.8353	1	103	233452	1903		MAP2K3;CSF2;LCP2;FYN;PLA2G4A
Steroid biosynthesis	0.2551	1	1	0	36	233519	1903		LSS;LIPA
Prion diseases	0.2651	1	1	1	123	233432	1903		IL6;CCL5;IL1A;IL1B;HSPA5;FYN
Adipocytokine signaling pathway	0.2686	1	1	4	426	233129	1903		NFKBIA;CD36;NFKB1;ACSL1;RELA;SOCS3;ACSL3;ACSL4;ACSL5;AKT3;TNF
Intestinal immune network for IgA production	0.2741	1	1	1	126	233429	1903		IL15;IL15RA;CD80;HLA-DPA1
Staphylococcus aureus infection	0.2891	1	1	2	230	233325	1903		ICAM1;FCAR;IL10;HLA-DPA1;CFB
Pathways in cancer	0.3011	1	1	62	7204	226351	1903		BID;NFKBIA;IL6;WNT5B;NKX3-1;RALA;PRKCB;PML;IL8;HGF;CCNA1;PIK3R5;NFKB1;MYC;MET;WNT5A;BRAF;FZD2;CDKN2B;PLD1;BIRC3;CBL;ITGAV;PTEN;TRAF1;CDKN1A;XIAP;NFKB2;VEGFA;TCF7L2;JUN;PTGS2;CEBPA;NRAS;RELA;AKT3
Regulation of autophagy	0.3223	1	1	2	245	233310	1903	ATG4C	ULK2;ATG4C
Insulin signaling pathway	0.3284	1	1	18	2065	231490	1903	TRIP10;RHOQ	SOCS1;TRIP10;INSR;PIK3R5;EIF4E;BRAF;RHEB;RHOQ;NRAS;SOCS3;CBL;AKT3
Dorso-ventral axis formation	0.3457	1	1	1	150	233405	1903	ETS2	ETS2
Maturity onset diabetes of the young	0.3467	1	1	2	256	233299	1903	HHEX	HES1;HHEX
Hematopoietic cell lineage	0.385	1	1	9	1079	232476	1903		IL6;CD38;IL7R;CD36;CD44;CSF2;CSF3;IL2RA;IL1R1;IL1A;IL1B;CSF1;CD55;TNF
Shigellosis	0.4008	1	1	1	169	233386	1903		NFKBIA;IL8;RIPK2;NFKB1;CD44;RELA
GnRH signaling pathway	0.4081	1	1	2	284	233271	1903		MAP2K7;MAP2K3;HBEGF;PLD1;SRC;MAP3K4;PLA2G4A
Colorectal cancer	0.413	1	1	13	1580	231975	1903	PIK3R5;JUN;AKT3	PIK3R5;MYC;BRAF;TCF7L2;JUN;AKT3
Aldosterone-regulated sodium reabsorption	0.4233	1	1	1	177	233378	1903		NEDD4L;PRKCB;INSR;PIK3R5
Metabolism of xenobiotics by cytochrome P450	0.4372	1	1	1	182	233373	1903		MGST1;AKR1C1;AKR1C2
Circadian rhythm - mammal	0.4427	1	1	1	184	233371	1903	BHLHE41	BHLHE41
Neurotrophin signaling pathway	0.4709	1	1	10	1280	232275	1903		NFKBIA;PSEN1;IRAK2;MAP2K7;RIPK2;BRAF;IRAK3;RPS6KA3;FOXO3;PIK3R5;NFKB1;RELA;AKT3;NRAS;JUN
T cell receptor signaling pathway	0.5596	1	1	3	486	233069	1903		NFKBIA;PPP3CC;MAP2K7;NFATC3;CSF2;LCP2;PAK1;MAP3K8;CBL;FYN;IL10;JUN;TNF;NRAS
Progesterone-mediated oocyte maturation	0.567	1	1	1	233	233322	1903		CCNA1;PIK3R5;BRAF;CDC23;RPS6KA3;AKT3
Fat digestion and absorption	0.5942	1	1	1	245	233310	1903		CD36;ABCA1;PLA2G4A
Pyrimidine metabolism	0.6586	1	1	1	276	233279	1903		UPB1;UPP1;CMPK2;PNPT1
PPAR signaling pathway	0.6802	1	1	6	974	232581	1903		LPL;OLR1;CD36;SCD5;ACSL1;ACSL3;ACSL4;ACSL5
ABC transporters	0.6819	1	1	4	706	232849	1903	ABCB5;ABCC5	ABCB5;ABCC5;ABCA1
Lysine degradation	0.6881	1	1	3	574	232981	1903	DOT1L;SETDB2	DOT1L;SETDB2
ECM-receptor interaction	0.7288	1	1	3	607	232948	1903		THBS1;ITGB8;CD36;CD44;COL1A1;SDC4;TNC;ITGAV
Glycosphingolipid biosynthesis - lacto and neolacto series	0.7324	1	1	1	318	233237	1903	FUT4	FUT4
Natural killer cell mediated cytotoxicity	0.7411	1	1	12	1851	231704	1903	ULBP2	BID;PPP3CC;PRKCB;ICAM1;PIK3R5;NFATC3;CSF2;BRAF;LCP2;TNFSF10;PAK1;FYN;ULBP2;NRAS;TNF
Basal cell carcinoma	0.7558	1	1	8	1331	232224	1903	WNT5B;WNT5A;FZD2	WNT5B;WNT5A;FZD2;TCF7L2
Glutathione metabolism	0.7817	1	1	1	352	233203	1903		MGST1;SMS;GCLM
Gastric acid secretion	0.7875	1	1	2	512	233043	1903	KCNJ2	PRKCB;KCNJ2
Citrate cycle (TCA cycle)	0.8294	1	1	1	392	233163	1903	DLD	DLD
Linoleic acid metabolism	0.8357	1	1	1	398	233157	1903	PLA2G4A	PLA2G4A
Basal transcription factors	0.8435	1	1	2	570	232985	1903	TAF13	GTF2H3;TAF13
Antigen processing and presentation	0.8603	1	1	2	591	232964	1903		PDIA3;CIITA;HSPA5;TNF;HLA-DPA1
SNARE interactions in vesicular transport	0.8678	1	1	2	601	232954	1903	BET1	BET1;VAMP3;STX7
RNA polymerase	0.87	1	1	1	435	233120	1903	POLR1B	POLR1B
MRNA surveillance pathway	0.8827	1	1	10	1839	231716	1903	RNMT;PELO;ETF1	RNMT;PPP2CB;PELO;ETF1;NXT2
Gap junction	0.8936	1	1	1	466	233089	1903		TUBB6;PRKCB;TUBB2A;SRC;NRAS
Glycerophospholipid metabolism	0.9061	1	1	2	662	232893	1903		ETNK1;EPT1;PLA2G15;PLD1;PLA2G4A
Focal adhesion	0.9076	1	1	13	2345	231210	1903		THBS1;ITGB8;PRKCB;HGF;PIK3R5;MET;BRAF;COL1A1;PAK1;BIRC3;SRC;ITGAV;PTEN;TNC;XIAP;VEGFA;FYN;JUN;CAPN2;AKT3
Adherens junction	0.9699	1	1	1	654	232901	1903		INSR;SRC;TCF7L2;MET;FYN
RNA degradation	0.9738	1	1	8	1916	231639	1903	BTG3;XRN1;RQCD1	BTG3;PNPT1;XRN1;RQCD1
Peroxisome	0.989	1	1	6	1761	231794	1903	FAR2	FAR2;ACSL1;ACSL3;ACSL4;ACSL5;SOD2
Wnt signaling pathway	0.9921	1	1	15	3327	230228	1903	MMP7	PPP3CC;PSEN1;WNT5B;PPP2CB;PRKCB;MYC;NFATC3;WNT5A;FZD2;FOSL1;MMP7;TCF7L2;JUN
Parkinson`s disease	0.9927	1	1	2	1076	232479	1903	LRRK2	LRRK2;NDUFS8
Proteasome	0.9953	1	1	1	916	232639	1903	PSMA6	PSMA6
Oocyte meiosis	0.996	1	1	1	938	232617	1903		PPP3CC;PPP2CB;ESPL1;CDC23;RPS6KA3
Bile secretion	0.9971	1	1	1	981	232574	1903	AQP9	AQP9
Purine metabolism	0.9973	1	1	14	3418	230137	1903	PDE4C;PDE4B	NT5C3;AMPD3;PDE4C;PNPT1;POLR1B;ADA;AK4;PDE4B;ADSS
Salivary secretion	0.9976	1	1	1	1009	232546	1903		CD38;PRKCB;ATP2B1;KCNN4
Alzheimer`s disease	0.9984	1	1	5	1930	231625	1903		BID;LPL;PPP3CC;PSEN1;ADAM17;NDUFS8;IL1B;CAPN2;TNF
Tight junction	0.9995	1	1	9	2912	230643	1903	EPB41L3	EPB41L3;PPP2CB;TJP2;SRC;ZAK;PRKCB;PTEN;AKT3;NRAS
Vascular smooth muscle contraction	0.9995	1	1	4	1933	231622	1903	ADM	PRKCB;ADM;ARHGEF1;BRAF;PLA2G4A
Systemic lupus erythematosus	0.9999	1	1	3	1900	231655	1903	H3F3C	H3F3C;CD80;IL10;TNF;HLA-DPA1
Lysosome	0.9999	1	1	16	4547	229008	1903	SLC11A2;LAMP3;CTSC	ATP6V1H;SLC11A2;PLA2G15;LAMP3;CTSC;LIPA;HEXA
Regulation of actin cytoskeleton	1	1	1	6	5148	228407	1903	RDX	ITGB8;PIK3R5;BRAF;ARHGEF1;PAK1;RDX;NRAS;ITGAV
Neuroactive ligand-receptor interaction	1	1	1	26	37474	196081	1903	PTGER2;PTGER4;NR3C1;P2RY13;ADORA3	PTGER2;PTGER4;HRH1;NR3C1;P2RX7;P2RX4;P2RY13;ADORA3
Cell cycle	1	1	1	3	2776	230779	1903		CCNA1;MYC;ESPL1;CDC23;CDKN2B;GADD45G;CDKN1A
Axon guidance	1	1	1	16	5295	228260	1903	SEMA3C;FES;EPHA4	PPP3CC;SEMA3C;FES;MET;NFATC3;PAK1;EPHA4;FYN;NRAS
Ubiquitin mediated proteolysis	1	1	1	15	5384	228171	1903	UBE2B	NEDD4L;SOCS1;PML;UBE2E1;UBE2B;CDC23;ITCH;BIRC3;SOCS3;XIAP;CBL
Calcium signaling pathway	1	1	1	6	2834	230721	1903		CD38;PPP3CC;HRH1;PRKCB;ATP2B1;P2RX7;P2RX4;SPHK1
Huntington`s disease	1	1	1	2	3499	230056	1903		CREB5;NDUFS8;AP2A1;SOD2
Spliceosome	1	1	1	3	6734	226821	1903	HNRNPC;SRSF3	HNRNPC;SRSF3
RNA transport	1	1	1	38	8897	224658	1903	EIF3J;NUPL1;EIF5;NUP98;EIF1B;EIF1AX;NUP35	EIF3J;NUPL1;EIF5;NUP98;EIF1B;EIF4E;EIF1AX;NUP35;NXT2
Protein processing in endoplasmic reticulum	1	1	1	31	9128	224427	1903	SELS;DNAJC3;PPP1R15A;SAR1A	PDIA3;UBE2E1;MAP2K7;SELS;DNAJC3;EIF2AK2;PPP1R15A;SAR1A;HSPA5;CAPN2

## Sheet: DAVID
Category	Term	Count	%	P-Value	Benjamini	FDR
KEGG_PATHWAY	Cytokine-cytokine receptor interaction	52	5.3	4.9e-13	8.1e-11	5.9e-10
KEGG_PATHWAY	NOD-like receptor signaling pathway	24	2.5	1.8e-12	1.5e-10	2.2e-09
KEGG_PATHWAY	Toll-like receptor signaling pathway	23	2.4	4e-07	2.2e-05	0.00049
KEGG_PATHWAY	Chemokine signaling pathway	31	3.2	3.5e-06	0.00014	0.0042
KEGG_PATHWAY	Apoptosis	17	1.7	0.00014	0.0046	0.17
KEGG_PATHWAY	Cytosolic DNA-sensing pathway	13	1.3	0.00018	0.005	0.22
KEGG_PATHWAY	Jak-STAT signaling pathway	23	2.4	0.00045	0.011	0.55
KEGG_PATHWAY	ErbB signaling pathway	16	1.6	0.00047	0.0097	0.57
KEGG_PATHWAY	B cell receptor signaling pathway	14	1.4	0.0011	0.019	1.3
KEGG_PATHWAY	MAPK signaling pathway	32	3.3	0.0012	0.02	1.5
KEGG_PATHWAY	Epithelial cell signaling in Helicobacter pylori infection	13	1.3	0.0014	0.021	1.7
KEGG_PATHWAY	T cell receptor signaling pathway	17	1.7	0.0017	0.023	2
KEGG_PATHWAY	RIG-I-like receptor signaling pathway	13	1.3	0.002	0.026	2.5
KEGG_PATHWAY	Pathways in cancer	35	3.6	0.0048	0.056	5.7
KEGG_PATHWAY	Small cell lung cancer	13	1.3	0.0084	0.088	9.7
KEGG_PATHWAY	Hematopoietic cell lineage	13	1.3	0.01	0.099	12

## Sheet: InnateDB
Pathway Name	Pathway Id	Source Name	Organism	Pathway uploaded gene count	Genes in InnateDB for this entity	Genes Ratio	Pathway p-value	Pathway p-value (corrected)	Gene Symbols	Genes (Symbol|IDBG-ID|Ensembl|Entrez|Fold Change|P-Value)
NOD-like receptor signaling pathway	8112	KEGG	9606	25	61	0.41	7.44088e-15	5.7518e-12	BIRC3 ; CASP1 ; CASP5 ; CCL2 ; CCL5 ; CCL7 ; CCL8 ; CXCL1 ; CXCL2 ; IL18 ; IL1B ; IL6 ; IL8 ; NAIP ; NFKB1 ; NFKBIA ; NLRC4 ; NLRP3 ; PYCARD ; RELA ; RIPK2 ; TAB2 ; TNF ; TNFAIP3 ; XIAP ;	BIRC3|IDBG-69045|ENSG00000023445|330|0|<1.0E-5| ; CASP1|IDBG-69618|ENSG00000137752|834|0|<1.0E-5| ; CASP5|IDBG-69591|ENSG00000137757|838|0|<1.0E-5| ; CCL2|IDBG-40504|ENSG00000108691|6347|0|<1.0E-5| ; CCL5|IDBG-42204|ENSG00000161570|6352|0|<1.0E-5| ; CCL7|IDBG-40580|ENSG00000108688|6354|0|<1.0E-5| ; CCL8|IDBG-40686|ENSG00000108700|6355|0|<1.0E-5| ; CXCL1|IDBG-24070|ENSG00000163739|2919|0|<1.0E-5| …
Cytokine-cytokine receptor interaction	515	KEGG	9606	54	270	0.2	1.69469e-14	6.54998e-12	ACVR2A ; CCL1 ; CCL14 ; CCL15 ; CCL18 ; CCL2 ; CCL20 ; CCL23 ; CCL3 ; CCL3L1 ; CCL4 ; CCL5 ; CCL7 ; CCL8 ; CCR2 ; CSF1 ; CSF2 ; CSF3 ; CXCL1 ; CXCL10 ; CXCL11 ; CXCL2 ; CXCL3 ; CXCL6 ; HGF ; IL10 ; IL12B ; IL15 ; IL15RA ; IL17RA ; IL18 ; IL19 ; IL1A ; IL1B ; IL1R1 ; IL21R ; IL24 ; IL2RA ; IL6 ; IL7R ; IL8 ; INHBA ; LIF ; MET ; OSM ; TNF ; TNFRSF4 ; TNFRSF9 ; TNFSF10 ; TNFSF15 ; TNFSF8 ; TNFSF9 ; …	ACVR2A|IDBG-71761|ENSG00000121989|92|0|<1.0E-5| ; CCL1|IDBG-40784|ENSG00000108702|6346|0|<1.0E-5| ; CCL14|IDBG-241444|ENSG00000213494|6358|0|<1.0E-5| ; CCL15|IDBG-42346|ENSG00000161574|6359|0|<1.0E-5| ; CCL18|IDBG-42459|ENSG00000006074|6362|0|<1.0E-5| ; CCL2|IDBG-40504|ENSG00000108691|6347|0|<1.0E-5| ; CCL20|IDBG-82684|ENSG00000115009|6364|0|<1.0E-5| ; CCL23|IDBG-42416|ENSG00000167236|6368|0|<1.0…
Toll-like receptor signaling pathway	564	KEGG	9606	24	102	0.24	1.50508e-08	2.90857e-06	AKT3 ; CCL3 ; CCL4 ; CCL5 ; CD80 ; CXCL10 ; CXCL11 ; IL12B ; IL1B ; IL6 ; IL8 ; IRF7 ; JUN ; MAP2K3 ; MAP2K7 ; MAP3K8 ; NFKB1 ; NFKBIA ; PIK3R5 ; RELA ; TAB2 ; TLR2 ; TLR7 ; TNF ;	AKT3|IDBG-107751|ENSG00000117020|10000|0|<1.0E-5| ; CCL3|IDBG-42503|ENSG00000006075|6348|0|<1.0E-5| ; CCL4|IDBG-42537|ENSG00000129277|6351|0|<1.0E-5| ; CCL5|IDBG-42204|ENSG00000161570|6352|0|<1.0E-5| ; CD80|IDBG-51287|ENSG00000121594|941|0|<1.0E-5| ; CXCL10|IDBG-25212|ENSG00000169245|3627|0|<1.0E-5| ; CXCL11|IDBG-25238|ENSG00000169248|6373|0|<1.0E-5| ; IL12B|IDBG-55893|ENSG00000113302|3593|0|<1.0…
Malaria	10359	KEGG	9606	15	48	0.31	1.45868e-07	2.25512e-05	CCL2 ; CD36 ; CSF3 ; HGF ; ICAM1 ; IL10 ; IL18 ; IL1B ; IL6 ; IL8 ; MET ; SDC4 ; THBS1 ; TLR2 ; TNF ;	CCL2|IDBG-40504|ENSG00000108691|6347|0|<1.0E-5| ; CD36|IDBG-24023|ENSG00000135218|948|0|<1.0E-5| ; CSF3|IDBG-46887|ENSG00000108342|1440|0|<1.0E-5| ; HGF|IDBG-24150|ENSG00000019991|3082|0|<1.0E-5| ; ICAM1|IDBG-26804|ENSG00000090339|3383|0|<1.0E-5| ; IL10|IDBG-106270|ENSG00000136634|3586|0|<1.0E-5| ; IL18|IDBG-71390|ENSG00000150782|3606|0|<1.0E-5| ; IL1B|IDBG-66519|ENSG00000125538|3553|0|<1.0E-5| ;…
Chemokine signaling pathway	4389	KEGG	9606	32	186	0.17	1.94984e-07	2.15318e-05	AKT3 ; BRAF ; CCL1 ; CCL14 ; CCL15 ; CCL18 ; CCL2 ; CCL20 ; CCL23 ; CCL3 ; CCL3L1 ; CCL4 ; CCL5 ; CCL7 ; CCL8 ; CCR2 ; CXCL1 ; CXCL10 ; CXCL11 ; CXCL2 ; CXCL3 ; CXCL6 ; FGR ; FOXO3 ; IL8 ; NFKB1 ; NFKBIA ; NRAS ; PAK1 ; PIK3R5 ; PRKCB ; RELA ;	AKT3|IDBG-107751|ENSG00000117020|10000|0|<1.0E-5| ; BRAF|IDBG-44351|ENSG00000157764|673|0|<1.0E-5| ; CCL1|IDBG-40784|ENSG00000108702|6346|0|<1.0E-5| ; CCL14|IDBG-241444|ENSG00000213494|6358|0|<1.0E-5| ; CCL15|IDBG-42346|ENSG00000161574|6359|0|<1.0E-5| ; CCL18|IDBG-42459|ENSG00000006074|6362|0|<1.0E-5| ; CCL2|IDBG-40504|ENSG00000108691|6347|0|<1.0E-5| ; CCL20|IDBG-82684|ENSG00000115009|6364|0|<1.0…
Osteoclast differentiation	10367	KEGG	9606	23	127	0.18	4.26051e-06	0.000253337	AKT3 ; BLNK ; CSF1 ; FOSL1 ; FOSL2 ; FYN ; IL1A ; IL1B ; IL1R1 ; JUN ; JUNB ; LCP2 ; MAP2K7 ; NFKB1 ; NFKB2 ; NFKBIA ; PIK3R5 ; PPP3CC ; RELA ; SOCS1 ; SOCS3 ; TAB2 ; TNF ;	AKT3|IDBG-107751|ENSG00000117020|10000|0|<1.0E-5| ; BLNK|IDBG-83724|ENSG00000095585|29760|0|<1.0E-5| ; CSF1|IDBG-100920|ENSG00000184371|1435|0|<1.0E-5| ; FOSL1|IDBG-58044|ENSG00000175592|8061|0|<1.0E-5| ; FOSL2|IDBG-41072|ENSG00000075426|2355|0|<1.0E-5| ; FYN|IDBG-95463|ENSG00000010810|2534|0|<1.0E-5| ; IL1A|IDBG-66482|ENSG00000115008|3552|0|<1.0E-5| ; IL1B|IDBG-66519|ENSG00000125538|3553|0|<1.0E…
Chagas disease (American trypanosomiasis)	10366	KEGG	9606	20	103	0.19	6.03458e-06	0.000291546	AKT3 ; CCL2 ; CCL3 ; CCL3L1 ; CCL5 ; CFLAR ; IL10 ; IL12B ; IL1B ; IL6 ; IL8 ; JUN ; NFKB1 ; NFKBIA ; PIK3R5 ; PPP2CB ; RELA ; SERPINE1 ; TLR2 ; TNF ;	AKT3|IDBG-107751|ENSG00000117020|10000|0|<1.0E-5| ; CCL2|IDBG-40504|ENSG00000108691|6347|0|<1.0E-5| ; CCL3|IDBG-42503|ENSG00000006075|6348|0|<1.0E-5| ; CCL3L1|IDBG-42619|ENSG00000205021|414062,6349|0|<1.0E-5| ; CCL5|IDBG-42204|ENSG00000161570|6352|0|<1.0E-5| ; CFLAR|IDBG-78386|ENSG00000003402|8837|0|<1.0E-5| ; IL10|IDBG-106270|ENSG00000136634|3586|0|<1.0E-5| ; IL12B|IDBG-55893|ENSG00000113302|359…
Apoptosis	485	KEGG	9606	18	88	0.2	8.23252e-06	0.000374338	AKT3 ; BID ; BIRC3 ; CAPN2 ; CFLAR ; IL1A ; IL1B ; IL1R1 ; IRAK2 ; IRAK3 ; NFKB1 ; NFKBIA ; PIK3R5 ; PPP3CC ; RELA ; TNF ; TNFSF10 ; XIAP ;	AKT3|IDBG-107751|ENSG00000117020|10000|0|<1.0E-5| ; BID|IDBG-1050|ENSG00000015475|637|0|<1.0E-5| ; BIRC3|IDBG-69045|ENSG00000023445|330|0|<1.0E-5| ; CAPN2|IDBG-106873|ENSG00000162909|824|0|<1.0E-5| ; CFLAR|IDBG-78386|ENSG00000003402|8837|0|<1.0E-5| ; IL1A|IDBG-66482|ENSG00000115008|3552|0|<1.0E-5| ; IL1B|IDBG-66519|ENSG00000125538|3553|0|<1.0E-5| ; IL1R1|IDBG-64088|ENSG00000115594|3554|0|<1.0E-5|…
Cytosolic DNA-sensing pathway	8117	KEGG	9606	13	54	0.24	2.42048e-05	0.000890968	CASP1 ; CCL4 ; CCL5 ; CXCL10 ; DDX58 ; IL18 ; IL1B ; IL6 ; IRF7 ; NFKB1 ; NFKBIA ; PYCARD ; RELA ;	CASP1|IDBG-69618|ENSG00000137752|834|0|<1.0E-5| ; CCL4|IDBG-42537|ENSG00000129277|6351|0|<1.0E-5| ; CCL5|IDBG-42204|ENSG00000161570|6352|0|<1.0E-5| ; CXCL10|IDBG-25212|ENSG00000169245|3627|0|<1.0E-5| ; DDX58|IDBG-55854|ENSG00000107201|23586|0|<1.0E-5| ; IL18|IDBG-71390|ENSG00000150782|3606|0|<1.0E-5| ; IL1B|IDBG-66519|ENSG00000125538|3553|0|<1.0E-5| ; IL6|IDBG-9462|ENSG00000136244|3569|0|<1.0E-5|…
MAPK signaling pathway	487	KEGG	9606	34	268	0.13	8.23839e-05	0.00244934	AKT3 ; BRAF ; DUSP1 ; DUSP2 ; DUSP4 ; DUSP5 ; DUSP7 ; GADD45G ; IL1A ; IL1B ; IL1R1 ; JUN ; MAP2K3 ; MAP2K7 ; MAP3K4 ; MAP3K8 ; MAPK6 ; MEF2C ; MYC ; NFKB1 ; NFKB2 ; NRAS ; PAK1 ; PLA2G4A ; PPP3CC ; PRKCB ; RAPGEF2 ; RASGRP3 ; RELA ; RPS6KA3 ; TAB2 ; TAOK1 ; TNF ; ZAK ;	AKT3|IDBG-107751|ENSG00000117020|10000|0|<1.0E-5| ; BRAF|IDBG-44351|ENSG00000157764|673|0|<1.0E-5| ; DUSP1|IDBG-57812|ENSG00000120129|1843|0|<1.0E-5| ; DUSP2|IDBG-61498|ENSG00000158050|1844|0|<1.0E-5| ; DUSP4|IDBG-15549|ENSG00000120875|1846|0|<1.0E-5| ; DUSP5|IDBG-89383|ENSG00000138166|1847|0|<1.0E-5| ; DUSP7|IDBG-38157|ENSG00000164086|1849|0|<1.0E-5| ; GADD45G|IDBG-75478|ENSG00000130222|10912|0|…
Jak-STAT signaling pathway	568	KEGG	9606	23	154	0.15	0.000104854	0.00289472	AKT3 ; CBL ; CSF2 ; CSF3 ; IL10 ; IL12B ; IL15 ; IL15RA ; IL19 ; IL21R ; IL24 ; IL2RA ; IL6 ; IL7R ; LIF ; MYC ; OSM ; PIK3R5 ; SOCS1 ; SOCS3 ; SPRED2 ; STAT4 ; TSLP ;	AKT3|IDBG-107751|ENSG00000117020|10000|0|<1.0E-5| ; CBL|IDBG-74417|ENSG00000110395|867|0|<1.0E-5| ; CSF2|IDBG-41275|ENSG00000164400|1437|0|<1.0E-5| ; CSF3|IDBG-46887|ENSG00000108342|1440|0|<1.0E-5| ; IL10|IDBG-106270|ENSG00000136634|3586|0|<1.0E-5| ; IL12B|IDBG-55893|ENSG00000113302|3593|0|<1.0E-5| ; IL15|IDBG-39028|ENSG00000164136|3600|0|<1.0E-5| ; IL15RA|IDBG-50371|ENSG00000134470|3601|0|<1.0E-…
Leishmaniasis	10355	KEGG	9606	14	70	0.2	0.000107136	0.00285573	HLA-DPA1 ; IL10 ; IL12B ; IL1A ; IL1B ; JUN ; NFKB1 ; NFKBIA ; PRKCB ; PTGS2 ; RELA ; TAB2 ; TLR2 ; TNF ;	HLA-DPA1|IDBG-303981|ENSG00000231389|3113|0|<1.0E-5| ; IL10|IDBG-106270|ENSG00000136634|3586|0|<1.0E-5| ; IL12B|IDBG-55893|ENSG00000113302|3593|0|<1.0E-5| ; IL1A|IDBG-66482|ENSG00000115008|3552|0|<1.0E-5| ; IL1B|IDBG-66519|ENSG00000125538|3553|0|<1.0E-5| ; JUN|IDBG-99221|ENSG00000177606|3725|0|<1.0E-5| ; NFKB1|IDBG-31974|ENSG00000109320|4790|0|<1.0E-5| ; NFKBIA|IDBG-4758|ENSG00000100906|4792|0|<1…
African trypanosomiasis	10384	KEGG	9606	9	32	0.28	0.000120578	0.0031069	ICAM1 ; IDO1 ; IL10 ; IL12B ; IL18 ; IL1B ; IL6 ; PRKCB ; TNF ;	ICAM1|IDBG-26804|ENSG00000090339|3383|0|<1.0E-5| ; IDO1|IDBG-18750|ENSG00000131203|3620|0|<1.0E-5| ; IL10|IDBG-106270|ENSG00000136634|3586|0|<1.0E-5| ; IL12B|IDBG-55893|ENSG00000113302|3593|0|<1.0E-5| ; IL18|IDBG-71390|ENSG00000150782|3606|0|<1.0E-5| ; IL1B|IDBG-66519|ENSG00000125538|3553|0|<1.0E-5| ; IL6|IDBG-9462|ENSG00000136244|3569|0|<1.0E-5| ; PRKCB|IDBG-20895|ENSG00000166501|5579|0|<1.0E-5|…
RIG-I-like receptor signaling pathway	5713	KEGG	9606	14	71	0.2	0.00012581	0.00313713	AZI2 ; CXCL10 ; DDX3X ; DDX58 ; DHX58 ; IFIH1 ; IL12B ; IL8 ; IRF7 ; ISG15 ; NFKB1 ; NFKBIA ; RELA ; TNF ;	AZI2|IDBG-23171|ENSG00000163512|64343|0|<1.0E-5| ; CXCL10|IDBG-25212|ENSG00000169245|3627|0|<1.0E-5| ; DDX3X|IDBG-229341|ENSG00000215301|1654|0|<1.0E-5| ; DDX58|IDBG-55854|ENSG00000107201|23586|0|<1.0E-5| ; DHX58|IDBG-50252|ENSG00000108771|79132|0|<1.0E-5| ; IFIH1|IDBG-73750|ENSG00000115267|64135|0|<1.0E-5| ; IL12B|IDBG-55893|ENSG00000113302|3593|0|<1.0E-5| ; IL8|IDBG-23954|ENSG00000169429|3576|0…
T cell receptor signaling pathway	563	KEGG	9606	18	108	0.17	0.000143727	0.0034719	AKT3 ; CBL ; CSF2 ; FYN ; IL10 ; JUN ; LCP2 ; MAP2K7 ; MAP3K8 ; NFATC3 ; NFKB1 ; NFKBIA ; NRAS ; PAK1 ; PIK3R5 ; PPP3CC ; RELA ; TNF ;	AKT3|IDBG-107751|ENSG00000117020|10000|0|<1.0E-5| ; CBL|IDBG-74417|ENSG00000110395|867|0|<1.0E-5| ; CSF2|IDBG-41275|ENSG00000164400|1437|0|<1.0E-5| ; FYN|IDBG-95463|ENSG00000010810|2534|0|<1.0E-5| ; IL10|IDBG-106270|ENSG00000136634|3586|0|<1.0E-5| ; JUN|IDBG-99221|ENSG00000177606|3725|0|<1.0E-5| ; LCP2|IDBG-57216|ENSG00000043462|3937|0|<1.0E-5| ; MAP2K7|IDBG-24000|ENSG00000076984|5609|0|<1.0E-5| …
B cell receptor signaling pathway	532	KEGG	9606	14	75	0.19	0.000231511	0.00511308	AKT3 ; BLNK ; CD79B ; JUN ; NFATC3 ; NFKB1 ; NFKBIA ; NRAS ; PIK3AP1 ; PIK3R5 ; PPP3CC ; PRKCB ; RASGRP3 ; RELA ;	AKT3|IDBG-107751|ENSG00000117020|10000|0|<1.0E-5| ; BLNK|IDBG-83724|ENSG00000095585|29760|0|<1.0E-5| ; CD79B|IDBG-64384|ENSG00000007312|974|0|<1.0E-5| ; JUN|IDBG-99221|ENSG00000177606|3725|0|<1.0E-5| ; NFATC3|IDBG-38028|ENSG00000072736|4775|0|<1.0E-5| ; NFKB1|IDBG-31974|ENSG00000109320|4790|0|<1.0E-5| ; NFKBIA|IDBG-4758|ENSG00000100906|4792|0|<1.0E-5| ; NRAS|IDBG-243969|ENSG00000213281|4893|0|<1.…
Epithelial cell signaling in Helicobacter pylori infection	457	KEGG	9606	13	68	0.19	0.00030099	0.00581663	ADAM17 ; ATP6V1H ; CCL5 ; CXCL1 ; HBEGF ; IL8 ; JUN ; MET ; NFKB1 ; NFKBIA ; PAK1 ; RELA ; SRC ;	ADAM17|IDBG-27788|ENSG00000151694|6868|0|<1.0E-5| ; ATP6V1H|IDBG-21670|ENSG00000047249|51606|0|<1.0E-5| ; CCL5|IDBG-42204|ENSG00000161570|6352|0|<1.0E-5| ; CXCL1|IDBG-24070|ENSG00000163739|2919|0|<1.0E-5| ; HBEGF|IDBG-48445|ENSG00000113070|1839|0|<1.0E-5| ; IL8|IDBG-23954|ENSG00000169429|3576|0|<1.0E-5| ; JUN|IDBG-99221|ENSG00000177606|3725|0|<1.0E-5| ; MET|IDBG-37371|ENSG00000105976|4233|0|<1.0E…
ErbB signaling pathway	461	KEGG	9606	15	86	0.17	0.000305028	0.0057509	ABL2 ; AKT3 ; BRAF ; CBL ; CDKN1A ; EREG ; HBEGF ; JUN ; MAP2K7 ; MYC ; NRAS ; PAK1 ; PIK3R5 ; PRKCB ; SRC ;	ABL2|IDBG-105099|ENSG00000143322|27|0|<1.0E-5| ; AKT3|IDBG-107751|ENSG00000117020|10000|0|<1.0E-5| ; BRAF|IDBG-44351|ENSG00000157764|673|0|<1.0E-5| ; CBL|IDBG-74417|ENSG00000110395|867|0|<1.0E-5| ; CDKN1A|IDBG-85033|ENSG00000124762|1026|0|<1.0E-5| ; EREG|IDBG-24370|ENSG00000124882|2069|0|<1.0E-5| ; HBEGF|IDBG-48445|ENSG00000113070|1839|0|<1.0E-5| ; JUN|IDBG-99221|ENSG00000177606|3725|0|<1.0E-5| ;…
Amoebiasis	10358	KEGG	9606	17	105	0.16	0.000312445	0.00575047	COL1A1 ; CSF2 ; CXCL1 ; IL10 ; IL12B ; IL1B ; IL1R1 ; IL6 ; IL8 ; NFKB1 ; PIK3R5 ; PRKCB ; RELA ; SERPINB2 ; SERPINB9 ; TLR2 ; TNF ;	COL1A1|IDBG-58238|ENSG00000108821|1277|0|<1.0E-5| ; CSF2|IDBG-41275|ENSG00000164400|1437|0|<1.0E-5| ; CXCL1|IDBG-24070|ENSG00000163739|2919|0|<1.0E-5| ; IL10|IDBG-106270|ENSG00000136634|3586|0|<1.0E-5| ; IL12B|IDBG-55893|ENSG00000113302|3593|0|<1.0E-5| ; IL1B|IDBG-66519|ENSG00000125538|3553|0|<1.0E-5| ; IL1R1|IDBG-64088|ENSG00000115594|3554|0|<1.0E-5| ; IL6|IDBG-9462|ENSG00000136244|3569|0|<1.0E-…
Pathways in cancer	4397	KEGG	9606	36	325	0.11	0.00075833	0.0104677	AKT3 ; BID ; BIRC3 ; BRAF ; CBL ; CCNA1 ; CDKN1A ; CDKN2B ; CEBPA ; FZD2 ; HGF ; IL6 ; IL8 ; ITGAV ; JUN ; MET ; MYC ; NFKB1 ; NFKB2 ; NFKBIA ; NKX3-1 ; NRAS ; PIK3R5 ; PLD1 ; PML ; PRKCB ; PTEN ; PTGS2 ; RALA ; RELA ; TCF7L2 ; TRAF1 ; VEGFA ; WNT5A ; WNT5B ; XIAP ;	AKT3|IDBG-107751|ENSG00000117020|10000|0|<1.0E-5| ; BID|IDBG-1050|ENSG00000015475|637|0|<1.0E-5| ; BIRC3|IDBG-69045|ENSG00000023445|330|0|<1.0E-5| ; BRAF|IDBG-44351|ENSG00000157764|673|0|<1.0E-5| ; CBL|IDBG-74417|ENSG00000110395|867|0|<1.0E-5| ; CCNA1|IDBG-24529|ENSG00000133101|8900|0|<1.0E-5| ; CDKN1A|IDBG-85033|ENSG00000124762|1026|0|<1.0E-5| ; CDKN2B|IDBG-54658|ENSG00000147883|1030|0|<1.0E-5| …
Hematopoietic cell lineage	415	KEGG	9606	14	84	0.17	0.000772166	0.0104717	CD36 ; CD38 ; CD44 ; CD55 ; CSF1 ; CSF2 ; CSF3 ; IL1A ; IL1B ; IL1R1 ; IL2RA ; IL6 ; IL7R ; TNF ;	CD36|IDBG-24023|ENSG00000135218|948|0|<1.0E-5| ; CD38|IDBG-10668|ENSG00000004468|952|0|<1.0E-5| ; CD44|IDBG-39556|ENSG00000026508|960|0|<1.0E-5| ; CD55|IDBG-106331|ENSG00000196352|1604|0|<1.0E-5| ; CSF1|IDBG-100920|ENSG00000184371|1435|0|<1.0E-5| ; CSF2|IDBG-41275|ENSG00000164400|1437|0|<1.0E-5| ; CSF3|IDBG-46887|ENSG00000108342|1440|0|<1.0E-5| ; IL1A|IDBG-66482|ENSG00000115008|3552|0|<1.0E-5| ; …
Hepatitis C	10404	KEGG	9606	19	134	0.14	0.000794652	0.0105908	AKT3 ; BRAF ; CDKN1A ; DDX58 ; EIF2AK2 ; IFIT1 ; IL8 ; IRF7 ; NFKB1 ; NFKBIA ; NRAS ; OAS1 ; OAS2 ; OAS3 ; PIK3R5 ; PPP2CB ; RELA ; SOCS3 ; TNF ;	AKT3|IDBG-107751|ENSG00000117020|10000|0|<1.0E-5| ; BRAF|IDBG-44351|ENSG00000157764|673|0|<1.0E-5| ; CDKN1A|IDBG-85033|ENSG00000124762|1026|0|<1.0E-5| ; DDX58|IDBG-55854|ENSG00000107201|23586|0|<1.0E-5| ; EIF2AK2|IDBG-44867|ENSG00000055332|5610|0|<1.0E-5| ; IFIT1|IDBG-81960|ENSG00000185745|3434|0|<1.0E-5| ; IL8|IDBG-23954|ENSG00000169429|3576|0|<1.0E-5| ; IRF7|IDBG-17225|ENSG00000185507|3665|0|<1…
Acute myeloid leukemia	424	KEGG	9606	11	57	0.19	0.000797637	0.0104504	AKT3 ; BRAF ; CCNA1 ; CEBPA ; MYC ; NFKB1 ; NRAS ; PIK3R5 ; PML ; RELA ; TCF7L2 ;	AKT3|IDBG-107751|ENSG00000117020|10000|0|<1.0E-5| ; BRAF|IDBG-44351|ENSG00000157764|673|0|<1.0E-5| ; CCNA1|IDBG-24529|ENSG00000133101|8900|0|<1.0E-5| ; CEBPA|IDBG-409028|ENSG00000245848|1050|0|<1.0E-5| ; MYC|IDBG-35442|ENSG00000136997|4609|0|<1.0E-5| ; NFKB1|IDBG-31974|ENSG00000109320|4790|0|<1.0E-5| ; NRAS|IDBG-243969|ENSG00000213281|4893|0|<1.0E-5| ; PIK3R5|IDBG-29574|ENSG00000141506|23533|0|<1…
Small cell lung cancer	527	KEGG	9606	13	85	0.15	0.0026268	0.0228147	AKT3 ; BIRC3 ; CDKN2B ; ITGAV ; MYC ; NFKB1 ; NFKBIA ; PIK3R5 ; PTEN ; PTGS2 ; RELA ; TRAF1 ; XIAP ;	AKT3|IDBG-107751|ENSG00000117020|10000|0|<1.0E-5| ; BIRC3|IDBG-69045|ENSG00000023445|330|0|<1.0E-5| ; CDKN2B|IDBG-54658|ENSG00000147883|1030|0|<1.0E-5| ; ITGAV|IDBG-77054|ENSG00000138448|3685|0|<1.0E-5| ; MYC|IDBG-35442|ENSG00000136997|4609|0|<1.0E-5| ; NFKB1|IDBG-31974|ENSG00000109320|4790|0|<1.0E-5| ; NFKBIA|IDBG-4758|ENSG00000100906|4792|0|<1.0E-5| ; PIK3R5|IDBG-29574|ENSG00000141506|23533|0|<…
Toxoplasmosis	10385	KEGG	9606	17	127	0.13	0.00276577	0.0237549	AKT3 ; BIRC3 ; CIITA ; HLA-DPA1 ; IL10 ; IL12B ; MAP2K3 ; NFKB1 ; NFKBIA ; PIK3R5 ; PLA2G4A ; RELA ; SOCS1 ; TAB2 ; TLR2 ; TNF ; XIAP ;	AKT3|IDBG-107751|ENSG00000117020|10000|0|<1.0E-5| ; BIRC3|IDBG-69045|ENSG00000023445|330|0|<1.0E-5| ; CIITA|IDBG-14377|ENSG00000179583|4261|0|<1.0E-5| ; HLA-DPA1|IDBG-303981|ENSG00000231389|3113|0|<1.0E-5| ; IL10|IDBG-106270|ENSG00000136634|3586|0|<1.0E-5| ; IL12B|IDBG-55893|ENSG00000113302|3593|0|<1.0E-5| ; MAP2K3|IDBG-35553|ENSG00000034152|5606|0|<1.0E-5| ; NFKB1|IDBG-31974|ENSG00000109320|4790…
Adipocytokine signaling pathway	590	KEGG	9606	11	68	0.16	0.00351449	0.0298539	ACSL1 ; ACSL3 ; ACSL4 ; ACSL5 ; AKT3 ; CD36 ; NFKB1 ; NFKBIA ; RELA ; SOCS3 ; TNF ;	ACSL1|IDBG-46574|ENSG00000151726|2180|0|<1.0E-5| ; ACSL3|IDBG-82223|ENSG00000123983|2181|0|<1.0E-5| ; ACSL4|IDBG-82250|ENSG00000068366|2182|0|<1.0E-5| ; ACSL5|IDBG-89780|ENSG00000197142|51703|0|<1.0E-5| ; AKT3|IDBG-107751|ENSG00000117020|10000|0|<1.0E-5| ; CD36|IDBG-24023|ENSG00000135218|948|0|<1.0E-5| ; NFKB1|IDBG-31974|ENSG00000109320|4790|0|<1.0E-5| ; NFKBIA|IDBG-4758|ENSG00000100906|4792|0|<1…
MTOR signaling pathway	405	KEGG	9606	9	52	0.17	0.00506666	0.0376589	AKT3 ; BRAF ; DDIT4 ; EIF4E ; PIK3R5 ; RHEB ; RPS6KA3 ; ULK2 ; VEGFA ;	AKT3|IDBG-107751|ENSG00000117020|10000|0|<1.0E-5| ; BRAF|IDBG-44351|ENSG00000157764|673|0|<1.0E-5| ; DDIT4|IDBG-77884|ENSG00000168209|54541|0|<1.0E-5| ; EIF4E|IDBG-30970|ENSG00000151247|1977|0|<1.0E-5| ; PIK3R5|IDBG-29574|ENSG00000141506|23533|0|<1.0E-5| ; RHEB|IDBG-49648|ENSG00000106615|6009|0|<1.0E-5| ; RPS6KA3|IDBG-50812|ENSG00000177189|6197|0|<1.0E-5| ; ULK2|IDBG-35098|ENSG00000083290|9706|0|…
VEGF signaling pathway	432	KEGG	9606	11	75	0.15	0.00751599	0.0505205	AKT3 ; NFATC3 ; NRAS ; PIK3R5 ; PLA2G4A ; PPP3CC ; PRKCB ; PTGS2 ; SPHK1 ; SRC ; VEGFA ;	AKT3|IDBG-107751|ENSG00000117020|10000|0|<1.0E-5| ; NFATC3|IDBG-38028|ENSG00000072736|4775|0|<1.0E-5| ; NRAS|IDBG-243969|ENSG00000213281|4893|0|<1.0E-5| ; PIK3R5|IDBG-29574|ENSG00000141506|23533|0|<1.0E-5| ; PLA2G4A|IDBG-105429|ENSG00000116711|5321|0|<1.0E-5| ; PPP3CC|IDBG-10931|ENSG00000120910|5533|0|<1.0E-5| ; PRKCB|IDBG-20895|ENSG00000166501|5579|0|<1.0E-5| ; PTGS2|IDBG-105426|ENSG00000073756|…
Prostate cancer	544	KEGG	9606	12	88	0.14	0.00956644	0.0611145	AKT3 ; BRAF ; CDKN1A ; CREB5 ; NFKB1 ; NFKBIA ; NKX3-1 ; NRAS ; PIK3R5 ; PTEN ; RELA ; TCF7L2 ;	AKT3|IDBG-107751|ENSG00000117020|10000|0|<1.0E-5| ; BRAF|IDBG-44351|ENSG00000157764|673|0|<1.0E-5| ; CDKN1A|IDBG-85033|ENSG00000124762|1026|0|<1.0E-5| ; CREB5|IDBG-10759|ENSG00000146592|9586|0|<1.0E-5| ; NFKB1|IDBG-31974|ENSG00000109320|4790|0|<1.0E-5| ; NFKBIA|IDBG-4758|ENSG00000100906|4792|0|<1.0E-5| ; NKX3-1|IDBG-12113|ENSG00000167034|4824|0|<1.0E-5| ; NRAS|IDBG-243969|ENSG00000213281|4893|0|<…
Fc epsilon RI signaling pathway	435	KEGG	9606	11	78	0.14	0.0100548	0.0616852	AKT3 ; CSF2 ; FYN ; LCP2 ; MAP2K3 ; MAP2K7 ; NRAS ; PIK3R5 ; PLA2G4A ; PRKCB ; TNF ;	AKT3|IDBG-107751|ENSG00000117020|10000|0|<1.0E-5| ; CSF2|IDBG-41275|ENSG00000164400|1437|0|<1.0E-5| ; FYN|IDBG-95463|ENSG00000010810|2534|0|<1.0E-5| ; LCP2|IDBG-57216|ENSG00000043462|3937|0|<1.0E-5| ; MAP2K3|IDBG-35553|ENSG00000034152|5606|0|<1.0E-5| ; MAP2K7|IDBG-24000|ENSG00000076984|5609|0|<1.0E-5| ; NRAS|IDBG-243969|ENSG00000213281|4893|0|<1.0E-5| ; PIK3R5|IDBG-29574|ENSG00000141506|23533|0|<…
Neurotrophin signaling pathway	4379	KEGG	9606	15	124	0.12	0.0120343	0.0664468	AKT3 ; BRAF ; FOXO3 ; IRAK2 ; IRAK3 ; JUN ; MAP2K7 ; NFKB1 ; NFKBIA ; NRAS ; PIK3R5 ; PSEN1 ; RELA ; RIPK2 ; RPS6KA3 ;	AKT3|IDBG-107751|ENSG00000117020|10000|0|<1.0E-5| ; BRAF|IDBG-44351|ENSG00000157764|673|0|<1.0E-5| ; FOXO3|IDBG-95024|ENSG00000118689|2309|0|<1.0E-5| ; IRAK2|IDBG-17914|ENSG00000134070|3656|0|<1.0E-5| ; IRAK3|IDBG-45584|ENSG00000090376|11213|0|<1.0E-5| ; JUN|IDBG-99221|ENSG00000177606|3725|0|<1.0E-5| ; MAP2K7|IDBG-24000|ENSG00000076984|5609|0|<1.0E-5| ; NFKB1|IDBG-31974|ENSG00000109320|4790|0|<1.…
Fc gamma R-mediated phagocytosis	4359	KEGG	9606	12	92	0.13	0.0134333	0.070639	AKT3 ; ASAP1 ; ASAP2 ; DNM1L ; MARCKS ; MYO10 ; PAK1 ; PIK3R5 ; PLA2G4A ; PLD1 ; PRKCB ; SPHK1 ;	AKT3|IDBG-107751|ENSG00000117020|10000|0|<1.0E-5| ; ASAP1|IDBG-35667|ENSG00000153317|50807|0|<1.0E-5| ; ASAP2|IDBG-27381|ENSG00000151693|8853|0|<1.0E-5| ; DNM1L|IDBG-26348|ENSG00000087470|10059|0|<1.0E-5| ; MARCKS|IDBG-95585|ENSG00000155130|4082|0|<1.0E-5| ; MYO10|IDBG-13359|ENSG00000145555|4651|0|<1.0E-5| ; PAK1|IDBG-65610|ENSG00000149269|5058|0|<1.0E-5| ; PIK3R5|IDBG-29574|ENSG00000141506|23533…
Endocytosis	4386	KEGG	9606	21	197	0.11	0.0137547	0.0718403	AP2A1 ; ARFGAP3 ; ASAP1 ; ASAP2 ; CBL ; DAB2 ; DNAJC6 ; DNM1L ; EHD1 ; IL2RA ; ITCH ; MET ; NEDD4L ; PLD1 ; PML ; PSD3 ; RAB11FIP1 ; RAB22A ; SH3GLB1 ; SRC ; VPS37A ;	AP2A1|IDBG-63459|ENSG00000196961|160|0|<1.0E-5| ; ARFGAP3|IDBG-408807|ENSG00000242247|26286|0|<1.0E-5| ; ASAP1|IDBG-35667|ENSG00000153317|50807|0|<1.0E-5| ; ASAP2|IDBG-27381|ENSG00000151693|8853|0|<1.0E-5| ; CBL|IDBG-74417|ENSG00000110395|867|0|<1.0E-5| ; DAB2|IDBG-17973|ENSG00000153071|1601|0|<1.0E-5| ; DNAJC6|IDBG-99461|ENSG00000116675|9829|0|<1.0E-5| ; DNM1L|IDBG-26348|ENSG00000087470|10059|0|…
Bladder cancer	514	KEGG	9606	7	42	0.17	0.015757	0.0817462	BRAF ; CDKN1A ; IL8 ; MYC ; NRAS ; THBS1 ; VEGFA ;	BRAF|IDBG-44351|ENSG00000157764|673|0|<1.0E-5| ; CDKN1A|IDBG-85033|ENSG00000124762|1026|0|<1.0E-5| ; IL8|IDBG-23954|ENSG00000169429|3576|0|<1.0E-5| ; MYC|IDBG-35442|ENSG00000136997|4609|0|<1.0E-5| ; NRAS|IDBG-243969|ENSG00000213281|4893|0|<1.0E-5| ; THBS1|IDBG-5926|ENSG00000137801|7057|0|<1.0E-5| ; VEGFA|IDBG-88716|ENSG00000112715|7422|0|<1.0E-5| ;
Endometrial cancer	506	KEGG	9606	8	52	0.15	0.0161746	0.0801473	AKT3 ; BRAF ; FOXO3 ; MYC ; NRAS ; PIK3R5 ; PTEN ; TCF7L2 ;	AKT3|IDBG-107751|ENSG00000117020|10000|0|<1.0E-5| ; BRAF|IDBG-44351|ENSG00000157764|673|0|<1.0E-5| ; FOXO3|IDBG-95024|ENSG00000118689|2309|0|<1.0E-5| ; MYC|IDBG-35442|ENSG00000136997|4609|0|<1.0E-5| ; NRAS|IDBG-243969|ENSG00000213281|4893|0|<1.0E-5| ; PIK3R5|IDBG-29574|ENSG00000141506|23533|0|<1.0E-5| ; PTEN|IDBG-81409|ENSG00000171862|5728|0|<1.0E-5| ; TCF7L2|IDBG-89861|ENSG00000148737|6934|0|<1.…
Chronic myeloid leukemia	582	KEGG	9606	10	73	0.14	0.0167268	0.0823556	AKT3 ; BRAF ; CBL ; CDKN1A ; MYC ; NFKB1 ; NFKBIA ; NRAS ; PIK3R5 ; RELA ;	AKT3|IDBG-107751|ENSG00000117020|10000|0|<1.0E-5| ; BRAF|IDBG-44351|ENSG00000157764|673|0|<1.0E-5| ; CBL|IDBG-74417|ENSG00000110395|867|0|<1.0E-5| ; CDKN1A|IDBG-85033|ENSG00000124762|1026|0|<1.0E-5| ; MYC|IDBG-35442|ENSG00000136997|4609|0|<1.0E-5| ; NFKB1|IDBG-31974|ENSG00000109320|4790|0|<1.0E-5| ; NFKBIA|IDBG-4758|ENSG00000100906|4792|0|<1.0E-5| ; NRAS|IDBG-243969|ENSG00000213281|4893|0|<1.0E-5…
Prion diseases	4396	KEGG	9606	6	35	0.17	0.0217084	0.101088	CCL5 ; FYN ; HSPA5 ; IL1A ; IL1B ; IL6 ;	CCL5|IDBG-42204|ENSG00000161570|6352|0|<1.0E-5| ; FYN|IDBG-95463|ENSG00000010810|2534|0|<1.0E-5| ; HSPA5|IDBG-85148|ENSG00000044574|3309|0|<1.0E-5| ; IL1A|IDBG-66482|ENSG00000115008|3552|0|<1.0E-5| ; IL1B|IDBG-66519|ENSG00000125538|3553|0|<1.0E-5| ; IL6|IDBG-9462|ENSG00000136244|3569|0|<1.0E-5| ;
Natural killer cell mediated cytotoxicity	578	KEGG	9606	15	133	0.11	0.0217202	0.100537	BID ; BRAF ; CSF2 ; FYN ; ICAM1 ; LCP2 ; NFATC3 ; NRAS ; PAK1 ; PIK3R5 ; PPP3CC ; PRKCB ; TNF ; TNFSF10 ; ULBP2 ;	BID|IDBG-1050|ENSG00000015475|637|0|<1.0E-5| ; BRAF|IDBG-44351|ENSG00000157764|673|0|<1.0E-5| ; CSF2|IDBG-41275|ENSG00000164400|1437|0|<1.0E-5| ; FYN|IDBG-95463|ENSG00000010810|2534|0|<1.0E-5| ; ICAM1|IDBG-26804|ENSG00000090339|3383|0|<1.0E-5| ; LCP2|IDBG-57216|ENSG00000043462|3937|0|<1.0E-5| ; NFATC3|IDBG-38028|ENSG00000072736|4775|0|<1.0E-5| ; NRAS|IDBG-243969|ENSG00000213281|4893|0|<1.0E-5| ; …
Graft-versus-host disease	2807	KEGG	9606	6	37	0.16	0.0279442	0.117396	CD80 ; HLA-DPA1 ; IL1A ; IL1B ; IL6 ; TNF ;	CD80|IDBG-51287|ENSG00000121594|941|0|<1.0E-5| ; HLA-DPA1|IDBG-303981|ENSG00000231389|3113|0|<1.0E-5| ; IL1A|IDBG-66482|ENSG00000115008|3552|0|<1.0E-5| ; IL1B|IDBG-66519|ENSG00000125538|3553|0|<1.0E-5| ; IL6|IDBG-9462|ENSG00000136244|3569|0|<1.0E-5| ; TNF|IDBG-302501|ENSG00000232810|7124|0|<1.0E-5| ;
Focal adhesion	546	KEGG	9606	20	199	0.1	0.0282425	0.117373	AKT3 ; BIRC3 ; BRAF ; CAPN2 ; COL1A1 ; FYN ; HGF ; ITGAV ; ITGB8 ; JUN ; MET ; PAK1 ; PIK3R5 ; PRKCB ; PTEN ; SRC ; THBS1 ; TNC ; VEGFA ; XIAP ;	AKT3|IDBG-107751|ENSG00000117020|10000|0|<1.0E-5| ; BIRC3|IDBG-69045|ENSG00000023445|330|0|<1.0E-5| ; BRAF|IDBG-44351|ENSG00000157764|673|0|<1.0E-5| ; CAPN2|IDBG-106873|ENSG00000162909|824|0|<1.0E-5| ; COL1A1|IDBG-58238|ENSG00000108821|1277|0|<1.0E-5| ; FYN|IDBG-95463|ENSG00000010810|2534|0|<1.0E-5| ; HGF|IDBG-24150|ENSG00000019991|3082|0|<1.0E-5| ; ITGAV|IDBG-77054|ENSG00000138448|3685|0|<1.0E-5…
Renal cell carcinoma	483	KEGG	9606	9	70	0.13	0.0326716	0.128853	AKT3 ; BRAF ; HGF ; JUN ; MET ; NRAS ; PAK1 ; PIK3R5 ; VEGFA ;	AKT3|IDBG-107751|ENSG00000117020|10000|0|<1.0E-5| ; BRAF|IDBG-44351|ENSG00000157764|673|0|<1.0E-5| ; HGF|IDBG-24150|ENSG00000019991|3082|0|<1.0E-5| ; JUN|IDBG-99221|ENSG00000177606|3725|0|<1.0E-5| ; MET|IDBG-37371|ENSG00000105976|4233|0|<1.0E-5| ; NRAS|IDBG-243969|ENSG00000213281|4893|0|<1.0E-5| ; PAK1|IDBG-65610|ENSG00000149269|5058|0|<1.0E-5| ; PIK3R5|IDBG-29574|ENSG00000141506|23533|0|<1.0E-5|…
Type I diabetes mellitus	525	KEGG	9606	6	41	0.15	0.0437037	0.154968	CD80 ; HLA-DPA1 ; IL12B ; IL1A ; IL1B ; TNF ;	CD80|IDBG-51287|ENSG00000121594|941|0|<1.0E-5| ; HLA-DPA1|IDBG-303981|ENSG00000231389|3113|0|<1.0E-5| ; IL12B|IDBG-55893|ENSG00000113302|3593|0|<1.0E-5| ; IL1A|IDBG-66482|ENSG00000115008|3552|0|<1.0E-5| ; IL1B|IDBG-66519|ENSG00000125538|3553|0|<1.0E-5| ; TNF|IDBG-302501|ENSG00000232810|7124|0|<1.0E-5| ;
Amyotrophic lateral sclerosis (ALS)	2798	KEGG	9606	7	53	0.13	0.0495877	0.170361	ALS2 ; BID ; CASP1 ; MAP2K3 ; PPP3CC ; SLC1A2 ; TNF ;	ALS2|IDBG-78753|ENSG00000003393|57679|0|<1.0E-5| ; BID|IDBG-1050|ENSG00000015475|637|0|<1.0E-5| ; CASP1|IDBG-69618|ENSG00000137752|834|0|<1.0E-5| ; MAP2K3|IDBG-35553|ENSG00000034152|5606|0|<1.0E-5| ; PPP3CC|IDBG-10931|ENSG00000120910|5533|0|<1.0E-5| ; SLC1A2|IDBG-39801|ENSG00000110436|6506|0|<1.0E-5| ; TNF|IDBG-302501|ENSG00000232810|7124|0|<1.0E-5| ;
P53 signaling pathway	597	KEGG	9606	8	68	0.12	0.06606	0.196402	BID ; CDKN1A ; GADD45G ; PMAIP1 ; PTEN ; SERPINE1 ; STEAP3 ; THBS1 ;	BID|IDBG-1050|ENSG00000015475|637|0|<1.0E-5| ; CDKN1A|IDBG-85033|ENSG00000124762|1026|0|<1.0E-5| ; GADD45G|IDBG-75478|ENSG00000130222|10912|0|<1.0E-5| ; PMAIP1|IDBG-4142|ENSG00000141682|5366|0|<1.0E-5| ; PTEN|IDBG-81409|ENSG00000171862|5728|0|<1.0E-5| ; SERPINE1|IDBG-32959|ENSG00000106366|5054|0|<1.0E-5| ; STEAP3|IDBG-67901|ENSG00000115107|55240|0|<1.0E-5| ; THBS1|IDBG-5926|ENSG00000137801|7057|0…
Viral myocarditis	8123	KEGG	9606	8	68	0.12	0.06606	0.196402	ABL2 ; BID ; CD55 ; CD80 ; CXADR ; FYN ; HLA-DPA1 ; ICAM1 ;	ABL2|IDBG-105099|ENSG00000143322|27|0|<1.0E-5| ; BID|IDBG-1050|ENSG00000015475|637|0|<1.0E-5| ; CD55|IDBG-106331|ENSG00000196352|1604|0|<1.0E-5| ; CD80|IDBG-51287|ENSG00000121594|941|0|<1.0E-5| ; CXADR|IDBG-854|ENSG00000154639|1525|0|<1.0E-5| ; FYN|IDBG-95463|ENSG00000010810|2534|0|<1.0E-5| ; HLA-DPA1|IDBG-303981|ENSG00000231389|3113|0|<1.0E-5| ; ICAM1|IDBG-26804|ENSG00000090339|3383|0|<1.0E-5| ;
Allograft rejection	2793	KEGG	9606	5	35	0.14	0.0688377	0.193496	CD80 ; HLA-DPA1 ; IL10 ; IL12B ; TNF ;	CD80|IDBG-51287|ENSG00000121594|941|0|<1.0E-5| ; HLA-DPA1|IDBG-303981|ENSG00000231389|3113|0|<1.0E-5| ; IL10|IDBG-106270|ENSG00000136634|3586|0|<1.0E-5| ; IL12B|IDBG-55893|ENSG00000113302|3593|0|<1.0E-5| ; TNF|IDBG-302501|ENSG00000232810|7124|0|<1.0E-5| ;
Intestinal immune network for IgA production	8118	KEGG	9606	6	46	0.13	0.0699561	0.195928	CD80 ; HLA-DPA1 ; IL10 ; IL15 ; IL15RA ; IL6 ;	CD80|IDBG-51287|ENSG00000121594|941|0|<1.0E-5| ; HLA-DPA1|IDBG-303981|ENSG00000231389|3113|0|<1.0E-5| ; IL10|IDBG-106270|ENSG00000136634|3586|0|<1.0E-5| ; IL15|IDBG-39028|ENSG00000164136|3600|0|<1.0E-5| ; IL15RA|IDBG-50371|ENSG00000134470|3601|0|<1.0E-5| ; IL6|IDBG-9462|ENSG00000136244|3569|0|<1.0E-5| ;
Melanoma	490	KEGG	9606	8	70	0.11	0.0756931	0.206024	AKT3 ; BRAF ; CDKN1A ; HGF ; MET ; NRAS ; PIK3R5 ; PTEN ;	AKT3|IDBG-107751|ENSG00000117020|10000|0|<1.0E-5| ; BRAF|IDBG-44351|ENSG00000157764|673|0|<1.0E-5| ; CDKN1A|IDBG-85033|ENSG00000124762|1026|0|<1.0E-5| ; HGF|IDBG-24150|ENSG00000019991|3082|0|<1.0E-5| ; MET|IDBG-37371|ENSG00000105976|4233|0|<1.0E-5| ; NRAS|IDBG-243969|ENSG00000213281|4893|0|<1.0E-5| ; PIK3R5|IDBG-29574|ENSG00000141506|23533|0|<1.0E-5| ; PTEN|IDBG-81409|ENSG00000171862|5728|0|<1.0E…
PPAR signaling pathway	566	KEGG	9606	8	70	0.11	0.0756931	0.206024	ACSL1 ; ACSL3 ; ACSL4 ; ACSL5 ; CD36 ; LPL ; OLR1 ; SCD5 ;	ACSL1|IDBG-46574|ENSG00000151726|2180|0|<1.0E-5| ; ACSL3|IDBG-82223|ENSG00000123983|2181|0|<1.0E-5| ; ACSL4|IDBG-82250|ENSG00000068366|2182|0|<1.0E-5| ; ACSL5|IDBG-89780|ENSG00000197142|51703|0|<1.0E-5| ; CD36|IDBG-24023|ENSG00000135218|948|0|<1.0E-5| ; LPL|IDBG-9632|ENSG00000175445|4023|0|<1.0E-5| ; OLR1|IDBG-18612|ENSG00000173391|4973|0|<1.0E-5| ; SCD5|IDBG-27129|ENSG00000145284|79966|0|<1.0E-5…
Pancreatic cancer	593	KEGG	9606	8	70	0.11	0.0756931	0.206024	AKT3 ; BRAF ; NFKB1 ; PIK3R5 ; PLD1 ; RALA ; RELA ; VEGFA ;	AKT3|IDBG-107751|ENSG00000117020|10000|0|<1.0E-5| ; BRAF|IDBG-44351|ENSG00000157764|673|0|<1.0E-5| ; NFKB1|IDBG-31974|ENSG00000109320|4790|0|<1.0E-5| ; PIK3R5|IDBG-29574|ENSG00000141506|23533|0|<1.0E-5| ; PLD1|IDBG-64867|ENSG00000075651|5337|0|<1.0E-5| ; RALA|IDBG-13210|ENSG00000006451|5898|0|<1.0E-5| ; RELA|IDBG-57543|ENSG00000173039|5970|0|<1.0E-5| ; VEGFA|IDBG-88716|ENSG00000112715|7422|0|<1.0…
TGF-beta signaling pathway	465	KEGG	9606	9	84	0.11	0.0854891	0.222502	ACVR2A ; CDKN2B ; ID2 ; ID3 ; INHBA ; MYC ; PPP2CB ; THBS1 ; TNF ;	ACVR2A|IDBG-71761|ENSG00000121989|92|0|<1.0E-5| ; CDKN2B|IDBG-54658|ENSG00000147883|1030|0|<1.0E-5| ; ID2|IDBG-27111|ENSG00000115738|3398|0|<1.0E-5| ; ID3|IDBG-93963|ENSG00000117318|3399|0|<1.0E-5| ; INHBA|IDBG-13490|ENSG00000122641|3624|0|<1.0E-5| ; MYC|IDBG-35442|ENSG00000136997|4609|0|<1.0E-5| ; PPP2CB|IDBG-15988|ENSG00000104695|5516|0|<1.0E-5| ; THBS1|IDBG-5926|ENSG00000137801|7057|0|<1.0E-5|…
Phagosome	10394	KEGG	9606	14	148	0.09	0.0885555	0.225919	ATP6V1H ; CD36 ; CLEC7A ; FCAR ; HLA-DPA1 ; ITGAV ; OLR1 ; STX12 ; STX7 ; THBS1 ; TLR2 ; TUBB2A ; TUBB6 ; VAMP3 ;	ATP6V1H|IDBG-21670|ENSG00000047249|51606|0|<1.0E-5| ; CD36|IDBG-24023|ENSG00000135218|948|0|<1.0E-5| ; CLEC7A|IDBG-18428|ENSG00000172243|64581|0|<1.0E-5| ; FCAR|IDBG-69662|ENSG00000186431|2204|0|<1.0E-5| ; HLA-DPA1|IDBG-303981|ENSG00000231389|3113|0|<1.0E-5| ; ITGAV|IDBG-77054|ENSG00000138448|3685|0|<1.0E-5| ; OLR1|IDBG-18612|ENSG00000173391|4973|0|<1.0E-5| ; STX12|IDBG-95016|ENSG00000117758|2367…
GnRH signaling pathway	412	KEGG	9606	10	97	0.1	0.0886276	0.225359	HBEGF ; JUN ; MAP2K3 ; MAP2K7 ; MAP3K4 ; NRAS ; PLA2G4A ; PLD1 ; PRKCB ; SRC ;	HBEGF|IDBG-48445|ENSG00000113070|1839|0|<1.0E-5| ; JUN|IDBG-99221|ENSG00000177606|3725|0|<1.0E-5| ; MAP2K3|IDBG-35553|ENSG00000034152|5606|0|<1.0E-5| ; MAP2K7|IDBG-24000|ENSG00000076984|5609|0|<1.0E-5| ; MAP3K4|IDBG-98770|ENSG00000085511|4216|0|<1.0E-5| ; NRAS|IDBG-243969|ENSG00000213281|4893|0|<1.0E-5| ; PLA2G4A|IDBG-105429|ENSG00000116711|5321|0|<1.0E-5| ; PLD1|IDBG-64867|ENSG00000075651|5337|0…
Glioma	523	KEGG	9606	7	62	0.11	0.0978116	0.240027	AKT3 ; BRAF ; CDKN1A ; NRAS ; PIK3R5 ; PRKCB ; PTEN ;	AKT3|IDBG-107751|ENSG00000117020|10000|0|<1.0E-5| ; BRAF|IDBG-44351|ENSG00000157764|673|0|<1.0E-5| ; CDKN1A|IDBG-85033|ENSG00000124762|1026|0|<1.0E-5| ; NRAS|IDBG-243969|ENSG00000213281|4893|0|<1.0E-5| ; PIK3R5|IDBG-29574|ENSG00000141506|23533|0|<1.0E-5| ; PRKCB|IDBG-20895|ENSG00000166501|5579|0|<1.0E-5| ; PTEN|IDBG-81409|ENSG00000171862|5728|0|<1.0E-5| ;
One carbon pool by folate	417	KEGG	9606	3	18	0.17	0.10291	0.244017	MTHFD2 ; MTHFD2L ; MTHFR ;	MTHFD2|IDBG-57007|ENSG00000065911|10797|0|<1.0E-5| ; MTHFD2L|IDBG-24298|ENSG00000163738|441024|0|<1.0E-5| ; MTHFR|IDBG-89655|ENSG00000177000|4524|0|<1.0E-5| ;
Thyroid cancer	500	KEGG	9606	4	29	0.14	0.109684	0.245755	BRAF ; MYC ; NRAS ; TCF7L2 ;	BRAF|IDBG-44351|ENSG00000157764|673|0|<1.0E-5| ; MYC|IDBG-35442|ENSG00000136997|4609|0|<1.0E-5| ; NRAS|IDBG-243969|ENSG00000213281|4893|0|<1.0E-5| ; TCF7L2|IDBG-89861|ENSG00000148737|6934|0|<1.0E-5| ;
Cell adhesion molecules (CAMs)	440	KEGG	9606	12	130	0.09	0.124422	0.27169	ALCAM ; CD226 ; CD274 ; CD58 ; CD80 ; CNTNAP2 ; HLA-DPA1 ; ICAM1 ; ITGAV ; ITGB8 ; MPZL1 ; SDC4 ;	ALCAM|IDBG-48383|ENSG00000170017|214|0|<1.0E-5| ; CD226|IDBG-4779|ENSG00000150637|10666|0|<1.0E-5| ; CD274|IDBG-47487|ENSG00000120217|29126|0|<1.0E-5| ; CD58|IDBG-101394|ENSG00000116815|965|0|<1.0E-5| ; CD80|IDBG-51287|ENSG00000121594|941|0|<1.0E-5| ; CNTNAP2|IDBG-46789|ENSG00000174469|26047|0|<1.0E-5| ; HLA-DPA1|IDBG-303981|ENSG00000231389|3113|0|<1.0E-5| ; ICAM1|IDBG-26804|ENSG00000090339|3383|…
Non-small cell lung cancer	444	KEGG	9606	6	54	0.11	0.127186	0.276943	AKT3 ; BRAF ; FOXO3 ; NRAS ; PIK3R5 ; PRKCB ;	AKT3|IDBG-107751|ENSG00000117020|10000|0|<1.0E-5| ; BRAF|IDBG-44351|ENSG00000157764|673|0|<1.0E-5| ; FOXO3|IDBG-95024|ENSG00000118689|2309|0|<1.0E-5| ; NRAS|IDBG-243969|ENSG00000213281|4893|0|<1.0E-5| ; PIK3R5|IDBG-29574|ENSG00000141506|23533|0|<1.0E-5| ; PRKCB|IDBG-20895|ENSG00000166501|5579|0|<1.0E-5| ;
Alanine, aspartate and glutamate metabolism	4387	KEGG	9606	4	32	0.13	0.143568	0.293592	ADSS ; GFPT1 ; GLS ; GLUL ;	ADSS|IDBG-107773|ENSG00000035687|159|0|<1.0E-5| ; GFPT1|IDBG-54824|ENSG00000198380|2673|0|<1.0E-5| ; GLS|IDBG-77587|ENSG00000115419|2744|0|<1.0E-5| ; GLUL|IDBG-105226|ENSG00000135821|2752|0|<1.0E-5| ;
Complement and coagulation cascades	456	KEGG	9606	7	69	0.1	0.148337	0.298606	CD55 ; CFB ; F3 ; PLAUR ; SERPINE1 ; TFPI ; THBD ;	CD55|IDBG-106331|ENSG00000196352|1604|0|<1.0E-5| ; CFB|IDBG-406018|ENSG00000243649|629|0|<1.0E-5| ; F3|IDBG-100378|ENSG00000117525|2152|0|<1.0E-5| ; PLAUR|IDBG-55442|ENSG00000011422|5329|0|<1.0E-5| ; SERPINE1|IDBG-32959|ENSG00000106366|5054|0|<1.0E-5| ; TFPI|IDBG-77150|ENSG00000003436|7035|0|<1.0E-5| ; THBD|IDBG-59473|ENSG00000178726|7056|0|<1.0E-5| ;
Insulin signaling pathway	531	KEGG	9606	12	135	0.09	0.151243	0.302096	AKT3 ; BRAF ; CBL ; EIF4E ; INSR ; NRAS ; PIK3R5 ; RHEB ; RHOQ ; SOCS1 ; SOCS3 ; TRIP10 ;	AKT3|IDBG-107751|ENSG00000117020|10000|0|<1.0E-5| ; BRAF|IDBG-44351|ENSG00000157764|673|0|<1.0E-5| ; CBL|IDBG-74417|ENSG00000110395|867|0|<1.0E-5| ; EIF4E|IDBG-30970|ENSG00000151247|1977|0|<1.0E-5| ; INSR|IDBG-22529|ENSG00000171105|3643|0|<1.0E-5| ; NRAS|IDBG-243969|ENSG00000213281|4893|0|<1.0E-5| ; PIK3R5|IDBG-29574|ENSG00000141506|23533|0|<1.0E-5| ; RHEB|IDBG-49648|ENSG00000106615|6009|0|<1.0E-…
Folate biosynthesis	513	KEGG	9606	2	11	0.18	0.152328	0.2981	GCH1 ; PTS ;	GCH1|IDBG-7150|ENSG00000131979|2643|0|<1.0E-5| ; PTS|IDBG-71519|ENSG00000150787|5805|0|<1.0E-5| ;
Wnt signaling pathway	445	KEGG	9606	13	150	0.09	0.159398	0.307269	FOSL1 ; FZD2 ; JUN ; MMP7 ; MYC ; NFATC3 ; PPP2CB ; PPP3CC ; PRKCB ; PSEN1 ; TCF7L2 ; WNT5A ; WNT5B ;	FOSL1|IDBG-58044|ENSG00000175592|8061|0|<1.0E-5| ; FZD2|IDBG-54110|ENSG00000180340|2535|0|<1.0E-5| ; JUN|IDBG-99221|ENSG00000177606|3725|0|<1.0E-5| ; MMP7|IDBG-69118|ENSG00000137673|4316|0|<1.0E-5| ; MYC|IDBG-35442|ENSG00000136997|4609|0|<1.0E-5| ; NFATC3|IDBG-38028|ENSG00000072736|4775|0|<1.0E-5| ; PPP2CB|IDBG-15988|ENSG00000104695|5516|0|<1.0E-5| ; PPP3CC|IDBG-10931|ENSG00000120910|5533|0|<1.0E…
Glycosaminoglycan biosynthesis - chondroitin sulfate	454	KEGG	9606	3	22	0.14	0.161707	0.306371	B3GALT6 ; CHST13 ; CHST7 ;	B3GALT6|IDBG-84714|ENSG00000176022|126792|0|<1.0E-5| ; CHST13|IDBG-54674|ENSG00000180767|166012|0|<1.0E-5| ; CHST7|IDBG-59178|ENSG00000147119|56548|0|<1.0E-5| ;
ECM-receptor interaction	468	KEGG	9606	8	84	0.1	0.164987	0.311822	CD36 ; CD44 ; COL1A1 ; ITGAV ; ITGB8 ; SDC4 ; THBS1 ; TNC ;	CD36|IDBG-24023|ENSG00000135218|948|0|<1.0E-5| ; CD44|IDBG-39556|ENSG00000026508|960|0|<1.0E-5| ; COL1A1|IDBG-58238|ENSG00000108821|1277|0|<1.0E-5| ; ITGAV|IDBG-77054|ENSG00000138448|3685|0|<1.0E-5| ; ITGB8|IDBG-9181|ENSG00000105855|3696|0|<1.0E-5| ; SDC4|IDBG-77503|ENSG00000124145|6385|0|<1.0E-5| ; THBS1|IDBG-5926|ENSG00000137801|7057|0|<1.0E-5| ; TNC|IDBG-82348|ENSG00000041982|3371|0|<1.0E-5| ;
Notch signaling pathway	491	KEGG	9606	5	47	0.11	0.177553	0.333128	ADAM17 ; HES1 ; JAG1 ; NUMB ; PSEN1 ;	ADAM17|IDBG-27788|ENSG00000151694|6868|0|<1.0E-5| ; HES1|IDBG-70185|ENSG00000114315|3280|0|<1.0E-5| ; JAG1|IDBG-54207|ENSG00000101384|182|0|<1.0E-5| ; NUMB|IDBG-11441|ENSG00000133961|8650|0|<1.0E-5| ; PSEN1|IDBG-11235|ENSG00000080815|5663|0|<1.0E-5| ;
Nitrogen metabolism	549	KEGG	9606	3	23	0.13	0.177723	0.327095	CA13 ; GLS ; GLUL ;	CA13|IDBG-27114|ENSG00000185015|377677|0|<1.0E-5| ; GLS|IDBG-77587|ENSG00000115419|2744|0|<1.0E-5| ; GLUL|IDBG-105226|ENSG00000135821|2752|0|<1.0E-5| ;
Primary immunodeficiency	2815	KEGG	9606	4	35	0.11	0.18097	0.33071	ADA ; BLNK ; CIITA ; IL7R ;	ADA|IDBG-76830|ENSG00000196839|100|0|<1.0E-5| ; BLNK|IDBG-83724|ENSG00000095585|29760|0|<1.0E-5| ; CIITA|IDBG-14377|ENSG00000179583|4261|0|<1.0E-5| ; IL7R|IDBG-16161|ENSG00000168685|3575|0|<1.0E-5| ;
Shigellosis	10374	KEGG	9606	6	60	0.1	0.181189	0.330327	CD44 ; IL8 ; NFKB1 ; NFKBIA ; RELA ; RIPK2 ;	CD44|IDBG-39556|ENSG00000026508|960|0|<1.0E-5| ; IL8|IDBG-23954|ENSG00000169429|3576|0|<1.0E-5| ; NFKB1|IDBG-31974|ENSG00000109320|4790|0|<1.0E-5| ; NFKBIA|IDBG-4758|ENSG00000100906|4792|0|<1.0E-5| ; RELA|IDBG-57543|ENSG00000173039|5970|0|<1.0E-5| ; RIPK2|IDBG-27941|ENSG00000104312|8767|0|<1.0E-5| ;
Amino sugar and nucleotide sugar metabolism	466	KEGG	9606	5	48	0.1	0.188602	0.340629	GFPT1 ; HEXA ; PGM3 ; UAP1 ; UXS1 ;	GFPT1|IDBG-54824|ENSG00000198380|2673|0|<1.0E-5| ; HEXA|IDBG-239945|ENSG00000213614|3073|0|<1.0E-5| ; PGM3|IDBG-93783|ENSG00000013375|5238|0|<1.0E-5| ; UAP1|IDBG-104387|ENSG00000117143|6675|0|<1.0E-5| ; UXS1|IDBG-64692|ENSG00000115652|80146|0|<1.0E-5| ;
Type II diabetes mellitus	577	KEGG	9606	5	48	0.1	0.188602	0.340629	INSR ; PIK3R5 ; SOCS1 ; SOCS3 ; TNF ;	INSR|IDBG-22529|ENSG00000171105|3643|0|<1.0E-5| ; PIK3R5|IDBG-29574|ENSG00000141506|23533|0|<1.0E-5| ; SOCS1|IDBG-14621|ENSG00000185338|8651|0|<1.0E-5| ; SOCS3|IDBG-70676|ENSG00000184557|9021|0|<1.0E-5| ; TNF|IDBG-302501|ENSG00000232810|7124|0|<1.0E-5| ;
Nicotinate and nicotinamide metabolism	496	KEGG	9606	3	24	0.13	0.194151	0.347404	CD38 ; NAMPT ; NT5C3 ;	CD38|IDBG-10668|ENSG00000004468|952|0|<1.0E-5| ; NAMPT|IDBG-35259|ENSG00000105835|10135|0|<1.0E-5| ; NT5C3|IDBG-11769|ENSG00000122643|51251|0|<1.0E-5| ;
Colorectal cancer	442	KEGG	9606	6	62	0.1	0.200954	0.348291	AKT3 ; BRAF ; JUN ; MYC ; PIK3R5 ; TCF7L2 ;	AKT3|IDBG-107751|ENSG00000117020|10000|0|<1.0E-5| ; BRAF|IDBG-44351|ENSG00000157764|673|0|<1.0E-5| ; JUN|IDBG-99221|ENSG00000177606|3725|0|<1.0E-5| ; MYC|IDBG-35442|ENSG00000136997|4609|0|<1.0E-5| ; PIK3R5|IDBG-29574|ENSG00000141506|23533|0|<1.0E-5| ; TCF7L2|IDBG-89861|ENSG00000148737|6934|0|<1.0E-5| ;
Ubiquitin mediated proteolysis	519	KEGG	9606	11	134	0.08	0.233835	0.386227	BIRC3 ; CBL ; CDC23 ; ITCH ; NEDD4L ; PML ; SOCS1 ; SOCS3 ; UBE2B ; UBE2E1 ; XIAP ;	BIRC3|IDBG-69045|ENSG00000023445|330|0|<1.0E-5| ; CBL|IDBG-74417|ENSG00000110395|867|0|<1.0E-5| ; CDC23|IDBG-46810|ENSG00000094880|8697|0|<1.0E-5| ; ITCH|IDBG-68143|ENSG00000078747|83737|0|<1.0E-5| ; NEDD4L|IDBG-3835|ENSG00000049759|23327|0|<1.0E-5| ; PML|IDBG-21462|ENSG00000140464|5371|0|<1.0E-5| ; SOCS1|IDBG-14621|ENSG00000185338|8651|0|<1.0E-5| ; SOCS3|IDBG-70676|ENSG00000184557|9021|0|<1.0E-5…
Staphylococcus aureus infection	10357	KEGG	9606	5	53	0.09	0.247105	0.404687	CFB ; FCAR ; HLA-DPA1 ; ICAM1 ; IL10 ;	CFB|IDBG-406018|ENSG00000243649|629|0|<1.0E-5| ; FCAR|IDBG-69662|ENSG00000186431|2204|0|<1.0E-5| ; HLA-DPA1|IDBG-303981|ENSG00000231389|3113|0|<1.0E-5| ; ICAM1|IDBG-26804|ENSG00000090339|3383|0|<1.0E-5| ; IL10|IDBG-106270|ENSG00000136634|3586|0|<1.0E-5| ;
Terpenoid backbone biosynthesis	443	KEGG	9606	2	15	0.13	0.247194	0.393981	HMGCS1 ; PDSS1 ;	HMGCS1|IDBG-19361|ENSG00000112972|3157|0|<1.0E-5| ; PDSS1|IDBG-63902|ENSG00000148459|23590|0|<1.0E-5| ;
Asthma	2818	KEGG	9606	3	28	0.11	0.262873	0.41301	HLA-DPA1 ; IL10 ; TNF ;	HLA-DPA1|IDBG-303981|ENSG00000231389|3113|0|<1.0E-5| ; IL10|IDBG-106270|ENSG00000136634|3586|0|<1.0E-5| ; TNF|IDBG-302501|ENSG00000232810|7124|0|<1.0E-5| ;
Pantothenate and CoA biosynthesis	471	KEGG	9606	2	16	0.13	0.271438	0.421328	BCAT1 ; UPB1 ;	BCAT1|IDBG-23682|ENSG00000060982|586|0|<1.0E-5| ; UPB1|IDBG-2864|ENSG00000100024|51733|0|<1.0E-5| ;
Aldosterone-regulated sodium reabsorption	8110	KEGG	9606	4	42	0.1	0.277862	0.429574	INSR ; NEDD4L ; PIK3R5 ; PRKCB ;	INSR|IDBG-22529|ENSG00000171105|3643|0|<1.0E-5| ; NEDD4L|IDBG-3835|ENSG00000049759|23327|0|<1.0E-5| ; PIK3R5|IDBG-29574|ENSG00000141506|23533|0|<1.0E-5| ; PRKCB|IDBG-20895|ENSG00000166501|5579|0|<1.0E-5| ;
Fatty acid metabolism	520	KEGG	9606	4	43	0.09	0.292405	0.445817	ACSL1 ; ACSL3 ; ACSL4 ; ACSL5 ;	ACSL1|IDBG-46574|ENSG00000151726|2180|0|<1.0E-5| ; ACSL3|IDBG-82223|ENSG00000123983|2181|0|<1.0E-5| ; ACSL4|IDBG-82250|ENSG00000068366|2182|0|<1.0E-5| ; ACSL5|IDBG-89780|ENSG00000197142|51703|0|<1.0E-5| ;
Steroid biosynthesis	596	KEGG	9606	2	19	0.11	0.343634	0.490997	LIPA ; LSS ;	LIPA|IDBG-81838|ENSG00000107798|3988|0|<1.0E-5| ; LSS|IDBG-6269|ENSG00000160285|4047|0|<1.0E-5| ;
Ether lipid metabolism	567	KEGG	9606	3	34	0.09	0.36963	0.515748	EPT1 ; PLA2G4A ; PLD1 ;	EPT1|IDBG-35563|ENSG00000138018||0|<1.0E-5| ; PLA2G4A|IDBG-105429|ENSG00000116711|5321|0|<1.0E-5| ; PLD1|IDBG-64867|ENSG00000075651|5337|0|<1.0E-5| ;
Fructose and mannose metabolism	548	KEGG	9606	3	35	0.09	0.387317	0.539453	MTMR2 ; PFKFB2 ; PFKFB3 ;	MTMR2|IDBG-68604|ENSG00000087053|8898|0|<1.0E-5| ; PFKFB2|IDBG-106316|ENSG00000123836|5208|0|<1.0E-5| ; PFKFB3|IDBG-50922|ENSG00000170525|5209|0|<1.0E-5| ;
Peroxisome	8122	KEGG	9606	6	79	0.08	0.38991	0.542086	ACSL1 ; ACSL3 ; ACSL4 ; ACSL5 ; FAR2 ; SOD2 ;	ACSL1|IDBG-46574|ENSG00000151726|2180|0|<1.0E-5| ; ACSL3|IDBG-82223|ENSG00000123983|2181|0|<1.0E-5| ; ACSL4|IDBG-82250|ENSG00000068366|2182|0|<1.0E-5| ; ACSL5|IDBG-89780|ENSG00000197142|51703|0|<1.0E-5| ; FAR2|IDBG-25076|ENSG00000064763|55711|0|<1.0E-5| ; SOD2|IDBG-98553|ENSG00000112096|6648|0|<1.0E-5| ;
SNARE interactions in vesicular transport	524	KEGG	9606	3	36	0.08	0.404883	0.549078	BET1 ; STX7 ; VAMP3 ;	BET1|IDBG-27278|ENSG00000105829|10282|0|<1.0E-5| ; STX7|IDBG-96639|ENSG00000079950|8417|0|<1.0E-5| ; VAMP3|IDBG-88198|ENSG00000049245|9341|0|<1.0E-5| ;
Antigen processing and presentation	493	KEGG	9606	5	66	0.08	0.412459	0.558372	CIITA ; HLA-DPA1 ; HSPA5 ; PDIA3 ; TNF ;	CIITA|IDBG-14377|ENSG00000179583|4261|0|<1.0E-5| ; HLA-DPA1|IDBG-303981|ENSG00000231389|3113|0|<1.0E-5| ; HSPA5|IDBG-85148|ENSG00000044574|3309|0|<1.0E-5| ; PDIA3|IDBG-9160|ENSG00000167004|2923|0|<1.0E-5| ; TNF|IDBG-302501|ENSG00000232810|7124|0|<1.0E-5| ;
Beta-Alanine metabolism	592	KEGG	9606	2	22	0.09	0.413398	0.551912	SMS ; UPB1 ;	SMS|IDBG-51494|ENSG00000102172|6611|0|<1.0E-5| ; UPB1|IDBG-2864|ENSG00000100024|51733|0|<1.0E-5| ;
Arginine and proline metabolism	462	KEGG	9606	4	52	0.08	0.424896	0.566283	CKB ; GLS ; GLUL ; SMS ;	CKB|IDBG-21613|ENSG00000166165|1152|0|<1.0E-5| ; GLS|IDBG-77587|ENSG00000115419|2744|0|<1.0E-5| ; GLUL|IDBG-105226|ENSG00000135821|2752|0|<1.0E-5| ; SMS|IDBG-51494|ENSG00000102172|6611|0|<1.0E-5| ;
Long-term potentiation	507	KEGG	9606	5	67	0.07	0.425283	0.565824	BRAF ; NRAS ; PPP3CC ; PRKCB ; RPS6KA3 ;	BRAF|IDBG-44351|ENSG00000157764|673|0|<1.0E-5| ; NRAS|IDBG-243969|ENSG00000213281|4893|0|<1.0E-5| ; PPP3CC|IDBG-10931|ENSG00000120910|5533|0|<1.0E-5| ; PRKCB|IDBG-20895|ENSG00000166501|5579|0|<1.0E-5| ; RPS6KA3|IDBG-50812|ENSG00000177189|6197|0|<1.0E-5| ;
Axon guidance	494	KEGG	9606	9	128	0.07	0.429783	0.570828	EPHA4 ; FES ; FYN ; MET ; NFATC3 ; NRAS ; PAK1 ; PPP3CC ; SEMA3C ;	EPHA4|IDBG-82135|ENSG00000116106|2043|0|<1.0E-5| ; FES|IDBG-30488|ENSG00000182511|2242|0|<1.0E-5| ; FYN|IDBG-95463|ENSG00000010810|2534|0|<1.0E-5| ; MET|IDBG-37371|ENSG00000105976|4233|0|<1.0E-5| ; NFATC3|IDBG-38028|ENSG00000072736|4775|0|<1.0E-5| ; NRAS|IDBG-243969|ENSG00000213281|4893|0|<1.0E-5| ; PAK1|IDBG-65610|ENSG00000149269|5058|0|<1.0E-5| ; PPP3CC|IDBG-10931|ENSG00000120910|5533|0|<1.0E-5…
Bacterial invasion of epithelial cells	10364	KEGG	9606	5	68	0.07	0.438054	0.575877	CBL ; DNM1L ; MET ; PIK3R5 ; SRC ;	CBL|IDBG-74417|ENSG00000110395|867|0|<1.0E-5| ; DNM1L|IDBG-26348|ENSG00000087470|10059|0|<1.0E-5| ; MET|IDBG-37371|ENSG00000105976|4233|0|<1.0E-5| ; PIK3R5|IDBG-29574|ENSG00000141506|23533|0|<1.0E-5| ; SRC|IDBG-74081|ENSG00000197122|6714|0|<1.0E-5| ;
Long-term depression	555	KEGG	9606	5	69	0.07	0.450759	0.591574	BRAF ; NRAS ; PLA2G4A ; PPP2CB ; PRKCB ;	BRAF|IDBG-44351|ENSG00000157764|673|0|<1.0E-5| ; NRAS|IDBG-243969|ENSG00000213281|4893|0|<1.0E-5| ; PLA2G4A|IDBG-105429|ENSG00000116711|5321|0|<1.0E-5| ; PPP2CB|IDBG-15988|ENSG00000104695|5516|0|<1.0E-5| ; PRKCB|IDBG-20895|ENSG00000166501|5579|0|<1.0E-5| ;
Vibrio cholerae infection	420	KEGG	9606	4	54	0.07	0.453815	0.594574	ATP6V1H ; KDELR2 ; PRKCB ; TJP2 ;	ATP6V1H|IDBG-21670|ENSG00000047249|51606|0|<1.0E-5| ; KDELR2|IDBG-8205|ENSG00000136240|11014|0|<1.0E-5| ; PRKCB|IDBG-20895|ENSG00000166501|5579|0|<1.0E-5| ; TJP2|IDBG-69307|ENSG00000119139|9414|0|<1.0E-5| ;
Tight junction	522	KEGG	9606	9	132	0.07	0.466637	0.602188	AKT3 ; EPB41L3 ; NRAS ; PPP2CB ; PRKCB ; PTEN ; SRC ; TJP2 ; ZAK ;	AKT3|IDBG-107751|ENSG00000117020|10000|0|<1.0E-5| ; EPB41L3|IDBG-527|ENSG00000082397|23136|0|<1.0E-5| ; NRAS|IDBG-243969|ENSG00000213281|4893|0|<1.0E-5| ; PPP2CB|IDBG-15988|ENSG00000104695|5516|0|<1.0E-5| ; PRKCB|IDBG-20895|ENSG00000166501|5579|0|<1.0E-5| ; PTEN|IDBG-81409|ENSG00000171862|5728|0|<1.0E-5| ; SRC|IDBG-74081|ENSG00000197122|6714|0|<1.0E-5| ; TJP2|IDBG-69307|ENSG00000119139|9414|0|<1.…
Basal cell carcinoma	570	KEGG	9606	4	55	0.07	0.468097	0.59808	FZD2 ; TCF7L2 ; WNT5A ; WNT5B ;	FZD2|IDBG-54110|ENSG00000180340|2535|0|<1.0E-5| ; TCF7L2|IDBG-89861|ENSG00000148737|6934|0|<1.0E-5| ; WNT5A|IDBG-40713|ENSG00000114251|7474|0|<1.0E-5| ; WNT5B|IDBG-11885|ENSG00000111186|81029|0|<1.0E-5| ;
Progesterone-mediated oocyte maturation	5712	KEGG	9606	6	86	0.07	0.470522	0.600188	AKT3 ; BRAF ; CCNA1 ; CDC23 ; PIK3R5 ; RPS6KA3 ;	AKT3|IDBG-107751|ENSG00000117020|10000|0|<1.0E-5| ; BRAF|IDBG-44351|ENSG00000157764|673|0|<1.0E-5| ; CCNA1|IDBG-24529|ENSG00000133101|8900|0|<1.0E-5| ; CDC23|IDBG-46810|ENSG00000094880|8697|0|<1.0E-5| ; PIK3R5|IDBG-29574|ENSG00000141506|23533|0|<1.0E-5| ; RPS6KA3|IDBG-50812|ENSG00000177189|6197|0|<1.0E-5| ;
Carbohydrate digestion and absorption	10389	KEGG	9606	3	40	0.08	0.473393	0.601863	AKT3 ; PIK3R5 ; PRKCB ;	AKT3|IDBG-107751|ENSG00000117020|10000|0|<1.0E-5| ; PIK3R5|IDBG-29574|ENSG00000141506|23533|0|<1.0E-5| ; PRKCB|IDBG-20895|ENSG00000166501|5579|0|<1.0E-5| ;
Sphingolipid metabolism	479	KEGG	9606	3	40	0.08	0.473393	0.601863	SGMS2 ; SGPP2 ; SPHK1 ;	SGMS2|IDBG-33373|ENSG00000164023|166929|0|<1.0E-5| ; SGPP2|IDBG-82202|ENSG00000163082|130367|0|<1.0E-5| ; SPHK1|IDBG-69650|ENSG00000176170|8877|0|<1.0E-5| ;
Maturity onset diabetes of the young	571	KEGG	9606	2	25	0.08	0.479284	0.603398	HES1 ; HHEX ;	HES1|IDBG-70185|ENSG00000114315|3280|0|<1.0E-5| ; HHEX|IDBG-82541|ENSG00000152804|3087|0|<1.0E-5| ;
Arachidonic acid metabolism	418	KEGG	9606	4	57	0.07	0.496235	0.620695	LTA4H ; PLA2G4A ; PTGS1 ; PTGS2 ;	LTA4H|IDBG-51977|ENSG00000111144|4048|0|<1.0E-5| ; PLA2G4A|IDBG-105429|ENSG00000116711|5321|0|<1.0E-5| ; PTGS1|IDBG-83887|ENSG00000095303|5742|0|<1.0E-5| ; PTGS2|IDBG-105426|ENSG00000073756|5743|0|<1.0E-5| ;
Glycosaminoglycan biosynthesis - heparan sulfate	458	KEGG	9606	2	26	0.08	0.500223	0.618675	B3GALT6 ; HS3ST3B1 ;	B3GALT6|IDBG-84714|ENSG00000176022|126792|0|<1.0E-5| ; HS3ST3B1|IDBG-31438|ENSG00000125430|9953|0|<1.0E-5| ;
Adherens junction	505	KEGG	9606	5	73	0.07	0.500714	0.618294	FYN ; INSR ; MET ; SRC ; TCF7L2 ;	FYN|IDBG-95463|ENSG00000010810|2534|0|<1.0E-5| ; INSR|IDBG-22529|ENSG00000171105|3643|0|<1.0E-5| ; MET|IDBG-37371|ENSG00000105976|4233|0|<1.0E-5| ; SRC|IDBG-74081|ENSG00000197122|6714|0|<1.0E-5| ; TCF7L2|IDBG-89861|ENSG00000148737|6934|0|<1.0E-5| ;
Tryptophan metabolism	504	KEGG	9606	3	42	0.07	0.506284	0.624175	IDO1 ; KMO ; KYNU ;	IDO1|IDBG-18750|ENSG00000131203|3620|0|<1.0E-5| ; KMO|IDBG-107692|ENSG00000117009|8564|0|<1.0E-5| ; KYNU|IDBG-71532|ENSG00000115919|8942|0|<1.0E-5| ;
ABC transporters	562	KEGG	9606	3	44	0.07	0.538077	0.655013	ABCA1 ; ABCB5 ; ABCC5 ;	ABCA1|IDBG-79441|ENSG00000165029|19|0|<1.0E-5| ; ABCB5|IDBG-9209|ENSG00000004846|340273|0|<1.0E-5| ; ABCC5|IDBG-67159|ENSG00000114770|10057|0|<1.0E-5| ;
Valine, leucine and isoleucine degradation	453	KEGG	9606	3	44	0.07	0.538077	0.655013	BCAT1 ; DLD ; HMGCS1 ;	BCAT1|IDBG-23682|ENSG00000060982|586|0|<1.0E-5| ; DLD|IDBG-35812|ENSG00000091140|1738|0|<1.0E-5| ; HMGCS1|IDBG-19361|ENSG00000112972|3157|0|<1.0E-5| ;
Homologous recombination	2808	KEGG	9606	2	28	0.07	0.540439	0.648694	NBN ; XRCC2 ;	NBN|IDBG-28009|ENSG00000104320|4683|0|<1.0E-5| ; XRCC2|IDBG-50037|ENSG00000196584|7516|0|<1.0E-5| ;
Fat digestion and absorption	10369	KEGG	9606	3	45	0.07	0.553528	0.661325	ABCA1 ; CD36 ; PLA2G4A ;	ABCA1|IDBG-79441|ENSG00000165029|19|0|<1.0E-5| ; CD36|IDBG-24023|ENSG00000135218|948|0|<1.0E-5| ; PLA2G4A|IDBG-105429|ENSG00000116711|5321|0|<1.0E-5| ;
Mucin type O-Glycan biosynthesis	508	KEGG	9606	2	29	0.07	0.55969	0.6656	B4GALT5 ; GALNT5 ;	B4GALT5|IDBG-80555|ENSG00000158470|9334|0|<1.0E-5| ; GALNT5|IDBG-72836|ENSG00000136542|11227|0|<1.0E-5| ;
Glycerophospholipid metabolism	489	KEGG	9606	5	78	0.06	0.560507	0.664527	EPT1 ; ETNK1 ; PLA2G15 ; PLA2G4A ; PLD1 ;	EPT1|IDBG-35563|ENSG00000138018||0|<1.0E-5| ; ETNK1|IDBG-23439|ENSG00000139163|55500|0|<1.0E-5| ; PLA2G15|IDBG-38228|ENSG00000103066|23659|0|<1.0E-5| ; PLA2G4A|IDBG-105429|ENSG00000116711|5321|0|<1.0E-5| ; PLD1|IDBG-64867|ENSG00000075651|5337|0|<1.0E-5| ;
MRNA surveillance pathway	10376	KEGG	9606	5	78	0.06	0.560507	0.664527	ETF1 ; NXT2 ; PELO ; PPP2CB ; RNMT ;	ETF1|IDBG-47217|ENSG00000120705|2107|0|<1.0E-5| ; NXT2|IDBG-82177|ENSG00000101888|55916|0|<1.0E-5| ; PELO|IDBG-20210|ENSG00000152684|53918|0|<1.0E-5| ; PPP2CB|IDBG-15988|ENSG00000104695|5516|0|<1.0E-5| ; RNMT|IDBG-1256|ENSG00000101654|8731|0|<1.0E-5| ;
Pyrimidine metabolism	409	KEGG	9606	6	96	0.06	0.579549	0.679804	CMPK2 ; NT5C3 ; PNPT1 ; POLR1B ; UPB1 ; UPP1 ;	CMPK2|IDBG-26891|ENSG00000134326|129607|0|<1.0E-5| ; NT5C3|IDBG-11769|ENSG00000122643|51251|0|<1.0E-5| ; PNPT1|IDBG-52626|ENSG00000138035|87178|0|<1.0E-5| ; POLR1B|IDBG-66306|ENSG00000125630|84172|0|<1.0E-5| ; UPB1|IDBG-2864|ENSG00000100024|51733|0|<1.0E-5| ; UPP1|IDBG-16202|ENSG00000183696|7378|0|<1.0E-5| ;
Protein processing in endoplasmic reticulum	10363	KEGG	9606	10	163	0.06	0.596229	0.696201	CAPN2 ; DNAJC3 ; EIF2AK2 ; HSPA5 ; MAP2K7 ; PDIA3 ; PPP1R15A ; SAR1A ; SELS ; UBE2E1 ;	CAPN2|IDBG-106873|ENSG00000162909|824|0|<1.0E-5| ; DNAJC3|IDBG-43059|ENSG00000102580|5611|0|<1.0E-5| ; EIF2AK2|IDBG-44867|ENSG00000055332|5610|0|<1.0E-5| ; HSPA5|IDBG-85148|ENSG00000044574|3309|0|<1.0E-5| ; MAP2K7|IDBG-24000|ENSG00000076984|5609|0|<1.0E-5| ; PDIA3|IDBG-9160|ENSG00000167004|2923|0|<1.0E-5| ; PPP1R15A|IDBG-61333|ENSG00000087074|23645|0|<1.0E-5| ; SAR1A|IDBG-77267|ENSG00000079332|56…
Melanogenesis	595	KEGG	9606	6	98	0.06	0.599989	0.696384	FZD2 ; NRAS ; PRKCB ; TCF7L2 ; WNT5A ; WNT5B ;	FZD2|IDBG-54110|ENSG00000180340|2535|0|<1.0E-5| ; NRAS|IDBG-243969|ENSG00000213281|4893|0|<1.0E-5| ; PRKCB|IDBG-20895|ENSG00000166501|5579|0|<1.0E-5| ; TCF7L2|IDBG-89861|ENSG00000148737|6934|0|<1.0E-5| ; WNT5A|IDBG-40713|ENSG00000114251|7474|0|<1.0E-5| ; WNT5B|IDBG-11885|ENSG00000111186|81029|0|<1.0E-5| ;
RNA transport	10361	KEGG	9606	9	148	0.06	0.606804	0.703238	EIF1AX ; EIF1B ; EIF3J ; EIF4E ; EIF5 ; NUP35 ; NUP98 ; NUPL1 ; NXT2 ;	EIF1AX|IDBG-50658|ENSG00000173674|1964|0|<1.0E-5| ; EIF1B|IDBG-27073|ENSG00000114784|10289|0|<1.0E-5| ; EIF3J|IDBG-9813|ENSG00000104131|8669|0|<1.0E-5| ; EIF4E|IDBG-30970|ENSG00000151247|1977|0|<1.0E-5| ; EIF5|IDBG-21484|ENSG00000100664|1983|0|<1.0E-5| ; NUP35|IDBG-76939|ENSG00000163002|129401|0|<1.0E-5| ; NUP98|IDBG-24385|ENSG00000110713|4928|0|<1.0E-5| ; NUPL1|IDBG-16856|ENSG00000139496|9818|0|…
RNA degradation	5710	KEGG	9606	4	67	0.06	0.625642	0.720747	BTG3 ; PNPT1 ; RQCD1 ; XRN1 ;	BTG3|IDBG-891|ENSG00000154640|10950|0|<1.0E-5| ; PNPT1|IDBG-52626|ENSG00000138035|87178|0|<1.0E-5| ; RQCD1|IDBG-81033|ENSG00000144580|9125|0|<1.0E-5| ; XRN1|IDBG-59457|ENSG00000114127|54464|0|<1.0E-5| ;
Autoimmune thyroid disease	2799	KEGG	9606	3	50	0.06	0.625961	0.716842	CD80 ; HLA-DPA1 ; IL10 ;	CD80|IDBG-51287|ENSG00000121594|941|0|<1.0E-5| ; HLA-DPA1|IDBG-303981|ENSG00000231389|3113|0|<1.0E-5| ; IL10|IDBG-106270|ENSG00000136634|3586|0|<1.0E-5| ;
Glutathione metabolism	534	KEGG	9606	3	50	0.06	0.625961	0.716842	GCLM ; MGST1 ; SMS ;	GCLM|IDBG-100355|ENSG00000023909|2730|0|<1.0E-5| ; MGST1|IDBG-21764|ENSG00000008394|4257|0|<1.0E-5| ; SMS|IDBG-51494|ENSG00000102172|6611|0|<1.0E-5| ;
Glycerolipid metabolism	602	KEGG	9606	3	50	0.06	0.625961	0.716842	AGK ; LPL ; MGLL ;	AGK|IDBG-44452|ENSG00000006530|55750|0|<1.0E-5| ; LPL|IDBG-9632|ENSG00000175445|4023|0|<1.0E-5| ; MGLL|IDBG-55027|ENSG00000074416|11343|0|<1.0E-5| ;
Lysosome	4356	KEGG	9606	7	118	0.06	0.632519	0.722211	ATP6V1H ; CTSC ; HEXA ; LAMP3 ; LIPA ; PLA2G15 ; SLC11A2 ;	ATP6V1H|IDBG-21670|ENSG00000047249|51606|0|<1.0E-5| ; CTSC|IDBG-67143|ENSG00000109861|1075|0|<1.0E-5| ; HEXA|IDBG-239945|ENSG00000213614|3073|0|<1.0E-5| ; LAMP3|IDBG-66856|ENSG00000078081|27074|0|<1.0E-5| ; LIPA|IDBG-81838|ENSG00000107798|3988|0|<1.0E-5| ; PLA2G15|IDBG-38228|ENSG00000103066|23659|0|<1.0E-5| ; SLC11A2|IDBG-32924|ENSG00000110911|4891|0|<1.0E-5| ;
Regulation of autophagy	431	KEGG	9606	2	34	0.06	0.64717	0.731378	ATG4C ; ULK2 ;	ATG4C|IDBG-99370|ENSG00000125703|84938|0|<1.0E-5| ; ULK2|IDBG-35098|ENSG00000083290|9706|0|<1.0E-5| ;
Hypertrophic cardiomyopathy (HCM)	4395	KEGG	9606	5	86	0.06	0.648007	0.731255	IL6 ; ITGAV ; ITGB8 ; TNF ; TPM4 ;	IL6|IDBG-9462|ENSG00000136244|3569|0|<1.0E-5| ; ITGAV|IDBG-77054|ENSG00000138448|3685|0|<1.0E-5| ; ITGB8|IDBG-9181|ENSG00000105855|3696|0|<1.0E-5| ; TNF|IDBG-302501|ENSG00000232810|7124|0|<1.0E-5| ; TPM4|IDBG-35241|ENSG00000167460|7171|0|<1.0E-5| ;
Pathogenic Escherichia coli infection	434	KEGG	9606	3	53	0.06	0.665366	0.741107	FYN ; TUBB2A ; TUBB6 ;	FYN|IDBG-95463|ENSG00000010810|2534|0|<1.0E-5| ; TUBB2A|IDBG-57522|ENSG00000137267|7280|0|<1.0E-5| ; TUBB6|IDBG-1097|ENSG00000176014|84617|0|<1.0E-5| ;
Gap junction	436	KEGG	9606	5	88	0.06	0.668083	0.741994	NRAS ; PRKCB ; SRC ; TUBB2A ; TUBB6 ;	NRAS|IDBG-243969|ENSG00000213281|4893|0|<1.0E-5| ; PRKCB|IDBG-20895|ENSG00000166501|5579|0|<1.0E-5| ; SRC|IDBG-74081|ENSG00000197122|6714|0|<1.0E-5| ; TUBB2A|IDBG-57522|ENSG00000137267|7280|0|<1.0E-5| ; TUBB6|IDBG-1097|ENSG00000176014|84617|0|<1.0E-5| ;
Systemic lupus erythematosus	2805	KEGG	9606	5	88	0.06	0.668083	0.741994	CD80 ; H3F3C ; HLA-DPA1 ; IL10 ; TNF ;	CD80|IDBG-51287|ENSG00000121594|941|0|<1.0E-5| ; H3F3C|IDBG-26114|ENSG00000188375|440093|0|<1.0E-5| ; HLA-DPA1|IDBG-303981|ENSG00000231389|3113|0|<1.0E-5| ; IL10|IDBG-106270|ENSG00000136634|3586|0|<1.0E-5| ; TNF|IDBG-302501|ENSG00000232810|7124|0|<1.0E-5| ;
Cell cycle	473	KEGG	9606	7	123	0.06	0.675613	0.749281	CCNA1 ; CDC23 ; CDKN1A ; CDKN2B ; ESPL1 ; GADD45G ; MYC ;	CCNA1|IDBG-24529|ENSG00000133101|8900|0|<1.0E-5| ; CDC23|IDBG-46810|ENSG00000094880|8697|0|<1.0E-5| ; CDKN1A|IDBG-85033|ENSG00000124762|1026|0|<1.0E-5| ; CDKN2B|IDBG-54658|ENSG00000147883|1030|0|<1.0E-5| ; ESPL1|IDBG-36272|ENSG00000135476|9700|0|<1.0E-5| ; GADD45G|IDBG-75478|ENSG00000130222|10912|0|<1.0E-5| ; MYC|IDBG-35442|ENSG00000136997|4609|0|<1.0E-5| ;
Basal transcription factors	501	KEGG	9606	2	36	0.06	0.678097	0.749885	GTF2H3 ; TAF13 ;	GTF2H3|IDBG-63638|ENSG00000111358|2967|0|<1.0E-5| ; TAF13|IDBG-100762|ENSG00000197780|6884|0|<1.0E-5| ;
Alzheimer`s disease	521	KEGG	9606	9	158	0.06	0.684306	0.755669	ADAM17 ; BID ; CAPN2 ; IL1B ; LPL ; NDUFS8 ; PPP3CC ; PSEN1 ; TNF ;	ADAM17|IDBG-27788|ENSG00000151694|6868|0|<1.0E-5| ; BID|IDBG-1050|ENSG00000015475|637|0|<1.0E-5| ; CAPN2|IDBG-106873|ENSG00000162909|824|0|<1.0E-5| ; IL1B|IDBG-66519|ENSG00000125538|3553|0|<1.0E-5| ; LPL|IDBG-9632|ENSG00000175445|4023|0|<1.0E-5| ; NDUFS8|IDBG-61138|ENSG00000110717|4728|0|<1.0E-5| ; PPP3CC|IDBG-10931|ENSG00000120910|5533|0|<1.0E-5| ; PSEN1|IDBG-11235|ENSG00000080815|5663|0|<1.0E-5…
Purine metabolism	503	KEGG	9606	9	159	0.06	0.69152	0.76146	ADA ; ADSS ; AK4 ; AMPD3 ; NT5C3 ; PDE4B ; PDE4C ; PNPT1 ; POLR1B ;	ADA|IDBG-76830|ENSG00000196839|100|0|<1.0E-5| ; ADSS|IDBG-107773|ENSG00000035687|159|0|<1.0E-5| ; AK4|IDBG-99453|ENSG00000162433|100507855,205|0|<1.0E-5| ; AMPD3|IDBG-31696|ENSG00000133805|272|0|<1.0E-5| ; NT5C3|IDBG-11769|ENSG00000122643|51251|0|<1.0E-5| ; PDE4B|IDBG-99484|ENSG00000184588|5142|0|<1.0E-5| ; PDE4C|IDBG-37833|ENSG00000105650|5143|0|<1.0E-5| ; PNPT1|IDBG-52626|ENSG00000138035|87178|…
Phosphatidylinositol signaling system	528	KEGG	9606	4	75	0.05	0.712585	0.779106	PI4K2B ; PIK3R5 ; PRKCB ; PTEN ;	PI4K2B|IDBG-12178|ENSG00000038210|55300|0|<1.0E-5| ; PIK3R5|IDBG-29574|ENSG00000141506|23533|0|<1.0E-5| ; PRKCB|IDBG-20895|ENSG00000166501|5579|0|<1.0E-5| ; PTEN|IDBG-81409|ENSG00000171862|5728|0|<1.0E-5| ;
Lysine degradation	558	KEGG	9606	2	44	0.05	0.780245	0.827338	DOT1L ; SETDB2 ;	DOT1L|IDBG-15707|ENSG00000104885|84444|0|<1.0E-5| ; SETDB2|IDBG-33315|ENSG00000136169|83852|0|<1.0E-5| ;
Salivary secretion	10375	KEGG	9606	4	83	0.05	0.783795	0.827696	ATP2B1 ; CD38 ; KCNN4 ; PRKCB ;	ATP2B1|IDBG-50612|ENSG00000070961|490|0|<1.0E-5| ; CD38|IDBG-10668|ENSG00000004468|952|0|<1.0E-5| ; KCNN4|IDBG-55572|ENSG00000104783|3783|0|<1.0E-5| ; PRKCB|IDBG-20895|ENSG00000166501|5579|0|<1.0E-5| ;
N-Glycan biosynthesis	481	KEGG	9606	2	48	0.04	0.819791	0.85867	MGAT2 ; MGAT4A ;	MGAT2|IDBG-5731|ENSG00000168282|4247|0|<1.0E-5| ; MGAT4A|IDBG-63060|ENSG00000071073|11320|0|<1.0E-5| ;
Metabolism of xenobiotics by cytochrome P450	599	KEGG	9606	3	69	0.04	0.824816	0.860435	AKR1C1 ; AKR1C2 ; MGST1 ;	AKR1C1|IDBG-47077|ENSG00000187134|1645|0|<1.0E-5| ; AKR1C2|IDBG-47297|ENSG00000151632|100653286,1646|0|<1.0E-5| ; MGST1|IDBG-21764|ENSG00000008394|4257|0|<1.0E-5| ;
Dilated cardiomyopathy	5714	KEGG	9606	4	89	0.04	0.827419	0.861987	ITGAV ; ITGB8 ; TNF ; TPM4 ;	ITGAV|IDBG-77054|ENSG00000138448|3685|0|<1.0E-5| ; ITGB8|IDBG-9181|ENSG00000105855|3696|0|<1.0E-5| ; TNF|IDBG-302501|ENSG00000232810|7124|0|<1.0E-5| ; TPM4|IDBG-35241|ENSG00000167460|7171|0|<1.0E-5| ;
Oocyte meiosis	8113	KEGG	9606	5	109	0.05	0.832597	0.86505	CDC23 ; ESPL1 ; PPP2CB ; PPP3CC ; RPS6KA3 ;	CDC23|IDBG-46810|ENSG00000094880|8697|0|<1.0E-5| ; ESPL1|IDBG-36272|ENSG00000135476|9700|0|<1.0E-5| ; PPP2CB|IDBG-15988|ENSG00000104695|5516|0|<1.0E-5| ; PPP3CC|IDBG-10931|ENSG00000120910|5533|0|<1.0E-5| ; RPS6KA3|IDBG-50812|ENSG00000177189|6197|0|<1.0E-5| ;
Drug metabolism - other enzymes	2810	KEGG	9606	2	50	0.04	0.837071	0.868532	UPB1 ; UPP1 ;	UPB1|IDBG-2864|ENSG00000100024|51733|0|<1.0E-5| ; UPP1|IDBG-16202|ENSG00000183696|7378|0|<1.0E-5| ;
Arrhythmogenic right ventricular cardiomyopathy (ARVC)	4353	KEGG	9606	3	73	0.04	0.852737	0.882418	ITGAV ; ITGB8 ; TCF7L2 ;	ITGAV|IDBG-77054|ENSG00000138448|3685|0|<1.0E-5| ; ITGB8|IDBG-9181|ENSG00000105855|3696|0|<1.0E-5| ; TCF7L2|IDBG-89861|ENSG00000148737|6934|0|<1.0E-5| ;
Steroid hormone biosynthesis	579	KEGG	9606	2	54	0.04	0.867207	0.893801	AKR1C1 ; AKR1C2 ;	AKR1C1|IDBG-47077|ENSG00000187134|1645|0|<1.0E-5| ; AKR1C2|IDBG-47297|ENSG00000151632|100653286,1646|0|<1.0E-5| ;
Calcium signaling pathway	594	KEGG	9606	8	173	0.05	0.869201	0.894664	ATP2B1 ; CD38 ; HRH1 ; P2RX4 ; P2RX7 ; PPP3CC ; PRKCB ; SPHK1 ;	ATP2B1|IDBG-50612|ENSG00000070961|490|0|<1.0E-5| ; CD38|IDBG-10668|ENSG00000004468|952|0|<1.0E-5| ; HRH1|IDBG-18663|ENSG00000196639|3269|0|<1.0E-5| ; P2RX4|IDBG-61373|ENSG00000135124|5025|0|<1.0E-5| ; P2RX7|IDBG-61253|ENSG00000089041|5027|0|<1.0E-5| ; PPP3CC|IDBG-10931|ENSG00000120910|5533|0|<1.0E-5| ; PRKCB|IDBG-20895|ENSG00000166501|5579|0|<1.0E-5| ; SPHK1|IDBG-69650|ENSG00000176170|8877|0|<1.0…
Hedgehog signaling pathway	449	KEGG	9606	2	56	0.04	0.880276	0.904859	WNT5A ; WNT5B ;	WNT5A|IDBG-40713|ENSG00000114251|7474|0|<1.0E-5| ; WNT5B|IDBG-11885|ENSG00000111186|81029|0|<1.0E-5| ;
Inositol phosphate metabolism	452	KEGG	9606	2	57	0.04	0.886356	0.909898	PI4K2B ; PTEN ;	PI4K2B|IDBG-12178|ENSG00000038210|55300|0|<1.0E-5| ; PTEN|IDBG-81409|ENSG00000171862|5728|0|<1.0E-5| ;
Vascular smooth muscle contraction	4376	KEGG	9606	5	121	0.04	0.89208	0.91456	ADM ; ARHGEF1 ; BRAF ; PLA2G4A ; PRKCB ;	ADM|IDBG-31636|ENSG00000148926|133|0|<1.0E-5| ; ARHGEF1|IDBG-53394|ENSG00000076928|9138|0|<1.0E-5| ; BRAF|IDBG-44351|ENSG00000157764|673|0|<1.0E-5| ; PLA2G4A|IDBG-105429|ENSG00000116711|5321|0|<1.0E-5| ; PRKCB|IDBG-20895|ENSG00000166501|5579|0|<1.0E-5| ;
Pancreatic secretion	10370	KEGG	9606	4	101	0.04	0.892911	0.914199	ATP2B1 ; CD38 ; PLA2G4A ; PRKCB ;	ATP2B1|IDBG-50612|ENSG00000070961|490|0|<1.0E-5| ; CD38|IDBG-10668|ENSG00000004468|952|0|<1.0E-5| ; PLA2G4A|IDBG-105429|ENSG00000116711|5321|0|<1.0E-5| ; PRKCB|IDBG-20895|ENSG00000166501|5579|0|<1.0E-5| ;
Gastric acid secretion	10356	KEGG	9606	2	71	0.03	0.946253	0.964979	KCNJ2 ; PRKCB ;	KCNJ2|IDBG-66556|ENSG00000123700|3759|0|<1.0E-5| ; PRKCB|IDBG-20895|ENSG00000166501|5579|0|<1.0E-5| ;
Regulation of actin cytoskeleton	404	KEGG	9606	8	209	0.04	0.96088	0.977316	ARHGEF1 ; BRAF ; ITGAV ; ITGB8 ; NRAS ; PAK1 ; PIK3R5 ; RDX ;	ARHGEF1|IDBG-53394|ENSG00000076928|9138|0|<1.0E-5| ; BRAF|IDBG-44351|ENSG00000157764|673|0|<1.0E-5| ; ITGAV|IDBG-77054|ENSG00000138448|3685|0|<1.0E-5| ; ITGB8|IDBG-9181|ENSG00000105855|3696|0|<1.0E-5| ; NRAS|IDBG-243969|ENSG00000213281|4893|0|<1.0E-5| ; PAK1|IDBG-65610|ENSG00000149269|5058|0|<1.0E-5| ; PIK3R5|IDBG-29574|ENSG00000141506|23533|0|<1.0E-5| ; RDX|IDBG-70605|ENSG00000137710|5962|0|<1.0…
Metabolic pathways	4373	KEGG	9606	57	1093	0.05	0.962239	0.977413	ACSL1 ; ACSL3 ; ACSL4 ; ACSL5 ; ADA ; ADSS ; AGK ; AK4 ; AMDHD1 ; AMPD3 ; ATP6V1H ; B3GALT6 ; BCAT1 ; CD38 ; CKB ; CMPK2 ; DHRS9 ; DLD ; EPT1 ; ETNK1 ; FUT4 ; GALNT5 ; GCH1 ; GCLM ; GFPT1 ; GLS ; GLUL ; HEXA ; HMGCS1 ; IDO1 ; KMO ; KYNU ; LSS ; LTA4H ; MGAT2 ; MGAT4A ; MGLL ; MTHFD2 ; MTHFD2L ; MTHFR ; NDUFS8 ; NT5C3 ; PI4K2B ; PIGW ; PLA2G4A ; PLD1 ; POLR1B ; PTGS1 ; PTGS2 ; PTS ; SGMS2 ; SMS ; …	ACSL1|IDBG-46574|ENSG00000151726|2180|0|<1.0E-5| ; ACSL3|IDBG-82223|ENSG00000123983|2181|0|<1.0E-5| ; ACSL4|IDBG-82250|ENSG00000068366|2182|0|<1.0E-5| ; ACSL5|IDBG-89780|ENSG00000197142|51703|0|<1.0E-5| ; ADA|IDBG-76830|ENSG00000196839|100|0|<1.0E-5| ; ADSS|IDBG-107773|ENSG00000035687|159|0|<1.0E-5| ; AGK|IDBG-44452|ENSG00000006530|55750|0|<1.0E-5| ; AK4|IDBG-99453|ENSG00000162433|100507855,205|0…
Protein digestion and absorption	10383	KEGG	9606	2	79	0.03	0.965429	0.978082	COL1A1 ; KCNN4 ;	COL1A1|IDBG-58238|ENSG00000108821|1277|0|<1.0E-5| ; KCNN4|IDBG-55572|ENSG00000104783|3783|0|<1.0E-5| ;
Leukocyte transendothelial migration	510	KEGG	9606	3	115	0.03	0.980395	0.990647	ICAM1 ; PIK3R5 ; PRKCB ;	ICAM1|IDBG-26804|ENSG00000090339|3383|0|<1.0E-5| ; PIK3R5|IDBG-29574|ENSG00000141506|23533|0|<1.0E-5| ; PRKCB|IDBG-20895|ENSG00000166501|5579|0|<1.0E-5| ;
Parkinson`s disease	2812	KEGG	9606	2	115	0.02	0.995632	1	LRRK2 ; NDUFS8 ;	LRRK2|IDBG-27257|ENSG00000188906|120892|0|<1.0E-5| ; NDUFS8|IDBG-61138|ENSG00000110717|4728|0|<1.0E-5| ;
Oxidative phosphorylation	576	KEGG	9606	2	118	0.02	0.996341	1	ATP6V1H ; NDUFS8 ;	ATP6V1H|IDBG-21670|ENSG00000047249|51606|0|<1.0E-5| ; NDUFS8|IDBG-61138|ENSG00000110717|4728|0|<1.0E-5| ;
Huntington`s disease	4392	KEGG	9606	4	175	0.02	0.996665	1	AP2A1 ; CREB5 ; NDUFS8 ; SOD2 ;	AP2A1|IDBG-63459|ENSG00000196961|160|0|<1.0E-5| ; CREB5|IDBG-10759|ENSG00000146592|9586|0|<1.0E-5| ; NDUFS8|IDBG-61138|ENSG00000110717|4728|0|<1.0E-5| ; SOD2|IDBG-98553|ENSG00000112096|6648|0|<1.0E-5| ;
Spliceosome	8120	KEGG	9606	2	125	0.02	0.997585	1	HNRNPC ; SRSF3 ;	HNRNPC|IDBG-2589|ENSG00000092199|3183|0|<1.0E-5| ; SRSF3|IDBG-84998|ENSG00000112081|6428|0|<1.0E-5| ;
Neuroactive ligand-receptor interaction	416	KEGG	9606	8	315	0.03	0.999538	0.999538	ADORA3 ; HRH1 ; NR3C1 ; P2RX4 ; P2RX7 ; P2RY13 ; PTGER2 ; PTGER4 ;	ADORA3|IDBG-101074|ENSG00000121933|140|0|<1.0E-5| ; HRH1|IDBG-18663|ENSG00000196639|3269|0|<1.0E-5| ; NR3C1|IDBG-51637|ENSG00000113580|2908|0|<1.0E-5| ; P2RX4|IDBG-61373|ENSG00000135124|5025|0|<1.0E-5| ; P2RX7|IDBG-61253|ENSG00000089041|5027|0|<1.0E-5| ; P2RY13|IDBG-61535|ENSG00000181631|53829|0|<1.0E-5| ; PTGER2|IDBG-6740|ENSG00000125384|5732|0|<1.0E-5| ; PTGER4|IDBG-18106|ENSG00000171522|5734|0…

## Sheet: gProfileR
significant	p.value	term.size	query.size	overlap.size	precision	recall	term.id	domain	subgraph.number	term.name	relative.depth	intersection
TRUE	3.53e-14	291	1090	56	0.051	0.192	KEGG:04060	ke	20	Cytokine-cytokine receptor interaction	1	ENSG00000115009,ENSG00000122641,ENSG00000125657,ENSG00000136244,ENSG00000099985,ENSG00000232810,ENSG00000049249,ENSG00000169429,ENSG00000124875,ENSG00000163739,ENSG00000163734,ENSG00000081041,ENSG00000136634,ENSG00000256515,ENSG00000169248,ENSG00000205021,ENSG00000213494,ENSG00000108688,ENSG00000134470,ENSG00000115008,ENSG00000125538,ENSG00000161574,ENSG00000267596,ENSG00000105976,ENSG00000186827…
TRUE	3.86e-10	65	1090	22	0.02	0.338	KEGG:04621	ke	64	NOD-like receptor signaling pathway	1	ENSG00000100906,ENSG00000136244,ENSG00000232810,ENSG00000169429,ENSG00000163739,ENSG00000081041,ENSG00000249437,ENSG00000125538,ENSG00000137757,ENSG00000118503,ENSG00000104312,ENSG00000055208,ENSG00000162711,ENSG00000173039,ENSG00000109320,ENSG00000023445,ENSG00000108691,ENSG00000137752,ENSG00000150782,ENSG00000091106,ENSG00000161570,ENSG00000103490
TRUE	1.3e-07	116	1090	26	0.024	0.224	KEGG:04620	ke	21	Toll-like receptor signaling pathway	1	ENSG00000100906,ENSG00000136244,ENSG00000232810,ENSG00000169429,ENSG00000256515,ENSG00000169248,ENSG00000205021,ENSG00000034152,ENSG00000125538,ENSG00000107968,ENSG00000006075,ENSG00000129277,ENSG00000121594,ENSG00000055208,ENSG00000117020,ENSG00000173039,ENSG00000177606,ENSG00000109320,ENSG00000113302,ENSG00000185507,ENSG00000141506,ENSG00000137462,ENSG00000169245,ENSG00000076984,ENSG00000161570…
TRUE	1.38e-07	196	1090	35	0.032	0.179	KEGG:04062	ke	19	Chemokine signaling pathway	1	ENSG00000115009,ENSG00000100906,ENSG00000169429,ENSG00000124875,ENSG00000163739,ENSG00000163734,ENSG00000081041,ENSG00000256515,ENSG00000169248,ENSG00000205021,ENSG00000213494,ENSG00000108688,ENSG00000161574,ENSG00000267596,ENSG00000006075,ENSG00000129277,ENSG00000118689,ENSG00000157764,ENSG00000197122,ENSG00000117020,ENSG00000173039,ENSG00000213281,ENSG00000109320,ENSG00000108691,ENSG00000108700…
TRUE	1.89e-06	278	1090	41	0.038	0.147	KEGG:05164	ke	52	Influenza A	1	ENSG00000100906,ENSG00000102580,ENSG00000111335,ENSG00000055332,ENSG00000136244,ENSG00000232810,ENSG00000169429,ENSG00000034152,ENSG00000115008,ENSG00000125538,ENSG00000107201,ENSG00000184557,ENSG00000134321,ENSG00000115267,ENSG00000090339,ENSG00000157601,ENSG00000111331,ENSG00000117020,ENSG00000162711,ENSG00000173039,ENSG00000140464,ENSG00000177606,ENSG00000109320,ENSG00000108691,ENSG00000137752…
TRUE	3.3e-06	76	1090	19	0.017	0.25	KEGG:05134	ke	44	Legionellosis	1	ENSG00000100906,ENSG00000077150,ENSG00000136244,ENSG00000232810,ENSG00000169429,ENSG00000163739,ENSG00000163734,ENSG00000081041,ENSG00000249437,ENSG00000125538,ENSG00000173039,ENSG00000109320,ENSG00000137752,ENSG00000079332,ENSG00000150782,ENSG00000113302,ENSG00000091106,ENSG00000137462,ENSG00000103490
TRUE	1.36e-05	192	1090	31	0.028	0.161	KEGG:05202	ke	48	Transcriptional misregulation in cancer	1	ENSG00000172493,ENSG00000140379,ENSG00000133101,ENSG00000136244,ENSG00000162924,ENSG00000104885,ENSG00000169429,ENSG00000144802,ENSG00000105976,ENSG00000056558,ENSG00000119508,ENSG00000124813,ENSG00000136997,ENSG00000147050,ENSG00000173039,ENSG00000141380,ENSG00000140464,ENSG00000109320,ENSG00000023445,ENSG00000188375,ENSG00000132475,ENSG00000115738,ENSG00000164400,ENSG00000081189,ENSG00000124762…
TRUE	4.82e-05	89	1090	19	0.017	0.213	KEGG:05132	ke	4	Salmonella infection	1	ENSG00000136244,ENSG00000169429,ENSG00000163739,ENSG00000163734,ENSG00000081041,ENSG00000256515,ENSG00000205021,ENSG00000115008,ENSG00000125538,ENSG00000006075,ENSG00000129277,ENSG00000173039,ENSG00000177606,ENSG00000109320,ENSG00000137752,ENSG00000164400,ENSG00000150782,ENSG00000091106,ENSG00000103490
TRUE	8.66e-05	119	1090	22	0.02	0.185	KEGG:04064	ke	30	NF-kappa B signaling pathway	1	ENSG00000100906,ENSG00000140379,ENSG00000077150,ENSG00000232810,ENSG00000073756,ENSG00000169429,ENSG00000081041,ENSG00000125538,ENSG00000107201,ENSG00000056558,ENSG00000129277,ENSG00000118503,ENSG00000090339,ENSG00000003402,ENSG00000055208,ENSG00000115594,ENSG00000173039,ENSG00000109320,ENSG00000023445,ENSG00000101966,ENSG00000166501,ENSG00000095585
TRUE	0.000188	115	1090	21	0.019	0.183	KEGG:05142	ke	38	Chagas disease (American trypanosomiasis)	1	ENSG00000100906,ENSG00000136244,ENSG00000232810,ENSG00000169429,ENSG00000136634,ENSG00000256515,ENSG00000205021,ENSG00000125538,ENSG00000106366,ENSG00000006075,ENSG00000003402,ENSG00000117020,ENSG00000173039,ENSG00000177606,ENSG00000109320,ENSG00000108691,ENSG00000104695,ENSG00000113302,ENSG00000141506,ENSG00000137462,ENSG00000161570
TRUE	0.000206	56	1090	14	0.013	0.25	KEGG:05144	ke	35	Malaria	1	ENSG00000136244,ENSG00000232810,ENSG00000169429,ENSG00000136634,ENSG00000125538,ENSG00000105976,ENSG00000090339,ENSG00000108691,ENSG00000137801,ENSG00000108342,ENSG00000150782,ENSG00000135218,ENSG00000137462,ENSG00000019991
TRUE	0.000253	156	1090	25	0.023	0.16	KEGG:05162	ke	17	Measles	1	ENSG00000100906,ENSG00000111335,ENSG00000055332,ENSG00000136244,ENSG00000115008,ENSG00000125538,ENSG00000107201,ENSG00000115267,ENSG00000118503,ENSG00000055208,ENSG00000157601,ENSG00000111331,ENSG00000117020,ENSG00000173039,ENSG00000109320,ENSG00000113302,ENSG00000185507,ENSG00000141506,ENSG00000117090,ENSG00000121858,ENSG00000089127,ENSG00000137462,ENSG00000134460,ENSG00000010810,ENSG00000196664
TRUE	0.000424	93	1090	18	0.017	0.194	KEGG:04210	ke	26	Apoptosis	1	ENSG00000100906,ENSG00000232810,ENSG00000120910,ENSG00000115008,ENSG00000125538,ENSG00000134070,ENSG00000003402,ENSG00000162909,ENSG00000090376,ENSG00000117020,ENSG00000115594,ENSG00000173039,ENSG00000109320,ENSG00000023445,ENSG00000101966,ENSG00000141506,ENSG00000121858,ENSG00000015475
TRUE	0.000932	89	1090	17	0.016	0.191	KEGG:04012	ke	53	ErbB signaling pathway	1	ENSG00000143322,ENSG00000124882,ENSG00000109321,ENSG00000205595,ENSG00000136997,ENSG00000157764,ENSG00000197122,ENSG00000117020,ENSG00000213281,ENSG00000177606,ENSG00000113070,ENSG00000141506,ENSG00000166501,ENSG00000110395,ENSG00000149269,ENSG00000124762,ENSG00000076984
TRUE	0.00103	158	1090	24	0.022	0.152	KEGG:05161	ke	45	Hepatitis B	1	ENSG00000100906,ENSG00000133101,ENSG00000215301,ENSG00000136244,ENSG00000232810,ENSG00000169429,ENSG00000107201,ENSG00000115267,ENSG00000136997,ENSG00000197122,ENSG00000117020,ENSG00000173039,ENSG00000146592,ENSG00000213281,ENSG00000177606,ENSG00000109320,ENSG00000138378,ENSG00000185507,ENSG00000141506,ENSG00000166501,ENSG00000137462,ENSG00000124762,ENSG00000072736,ENSG00000171862
TRUE	0.00383	160	1090	23	0.021	0.144	KEGG:04630	ke	33	Jak-STAT signaling pathway	1	ENSG00000136244,ENSG00000099985,ENSG00000136634,ENSG00000134470,ENSG00000184557,ENSG00000136997,ENSG00000164136,ENSG00000117020,ENSG00000142224,ENSG00000162892,ENSG00000164400,ENSG00000108342,ENSG00000138378,ENSG00000113302,ENSG00000141506,ENSG00000198369,ENSG00000110395,ENSG00000145777,ENSG00000128342,ENSG00000185338,ENSG00000134460,ENSG00000168685,ENSG00000103522
TRUE	0.00391	171	1090	24	0.022	0.14	KEGG:04380	ke	41	Osteoclast differentiation	1	ENSG00000100906,ENSG00000171223,ENSG00000077150,ENSG00000075426,ENSG00000232810,ENSG00000120910,ENSG00000115008,ENSG00000125538,ENSG00000184557,ENSG00000055208,ENSG00000117020,ENSG00000115594,ENSG00000173039,ENSG00000175592,ENSG00000177606,ENSG00000109320,ENSG00000141506,ENSG00000043462,ENSG00000259207,ENSG00000184371,ENSG00000185338,ENSG00000076984,ENSG00000010810,ENSG00000095585
TRUE	0.00718	66	1090	13	0.012	0.197	KEGG:04623	ke	24	Cytosolic DNA-sensing pathway	1	ENSG00000100906,ENSG00000136244,ENSG00000125538,ENSG00000107201,ENSG00000129277,ENSG00000173039,ENSG00000109320,ENSG00000137752,ENSG00000150782,ENSG00000185507,ENSG00000169245,ENSG00000161570,ENSG00000103490
TRUE	0.00841	115	1090	18	0.017	0.157	KEGG:04660	ke	37	T cell receptor signaling pathway	1	ENSG00000100906,ENSG00000232810,ENSG00000136634,ENSG00000120910,ENSG00000107968,ENSG00000117020,ENSG00000173039,ENSG00000213281,ENSG00000177606,ENSG00000109320,ENSG00000164400,ENSG00000141506,ENSG00000043462,ENSG00000110395,ENSG00000149269,ENSG00000076984,ENSG00000010810,ENSG00000072736
TRUE	0.00864	285	1090	33	0.03	0.116	KEGG:04010	ke	23	MAPK signaling pathway	1	ENSG00000158050,ENSG00000120129,ENSG00000077150,ENSG00000085511,ENSG00000232810,ENSG00000109756,ENSG00000120910,ENSG00000034152,ENSG00000115008,ENSG00000125538,ENSG00000107968,ENSG00000055208,ENSG00000136997,ENSG00000157764,ENSG00000177189,ENSG00000130222,ENSG00000117020,ENSG00000115594,ENSG00000138166,ENSG00000173039,ENSG00000116711,ENSG00000213281,ENSG00000177606,ENSG00000109320,ENSG00000091436…
TRUE	0.0148	80	1090	14	0.013	0.175	KEGG:04622	ke	62	RIG-I-like receptor signaling pathway	1	ENSG00000100906,ENSG00000215301,ENSG00000232810,ENSG00000169429,ENSG00000107201,ENSG00000187608,ENSG00000115267,ENSG00000163512,ENSG00000173039,ENSG00000108771,ENSG00000109320,ENSG00000113302,ENSG00000185507,ENSG00000169245
TRUE	0.0148	80	1090	14	0.013	0.175	KEGG:04662	ke	13	B cell receptor signaling pathway	1	ENSG00000155629,ENSG00000100906,ENSG00000120910,ENSG00000117020,ENSG00000173039,ENSG00000213281,ENSG00000177606,ENSG00000109320,ENSG00000141506,ENSG00000166501,ENSG00000152689,ENSG00000072736,ENSG00000095585,ENSG00000007312
TRUE	0.0163	187	1090	24	0.022	0.128	KEGG:05323	ke	63	Rheumatoid arthritis	1	ENSG00000115009,ENSG00000136244,ENSG00000232810,ENSG00000169429,ENSG00000124875,ENSG00000163739,ENSG00000256515,ENSG00000205021,ENSG00000115008,ENSG00000125538,ENSG00000006075,ENSG00000121594,ENSG00000090339,ENSG00000164136,ENSG00000177606,ENSG00000108691,ENSG00000164400,ENSG00000150782,ENSG00000231389,ENSG00000137462,ENSG00000184371,ENSG00000161570,ENSG00000112715,ENSG00000047249
TRUE	0.0205	336	1090	36	0.033	0.107	KEGG:05200	ke	7	Pathways in cancer	1	ENSG00000075651,ENSG00000180340,ENSG00000100906,ENSG00000077150,ENSG00000133101,ENSG00000136244,ENSG00000073756,ENSG00000169429,ENSG00000114251,ENSG00000147883,ENSG00000167034,ENSG00000105976,ENSG00000056558,ENSG00000136997,ENSG00000157764,ENSG00000006451,ENSG00000117020,ENSG00000173039,ENSG00000111186,ENSG00000140464,ENSG00000213281,ENSG00000177606,ENSG00000109320,ENSG00000023445,ENSG00000101966…
TRUE	0.024	74	1090	13	0.012	0.176	KEGG:05120	ke	66	Epithelial cell signaling in Helicobacter pylori infection	1	ENSG00000100906,ENSG00000169429,ENSG00000163739,ENSG00000105976,ENSG00000151694,ENSG00000197122,ENSG00000173039,ENSG00000177606,ENSG00000109320,ENSG00000113070,ENSG00000149269,ENSG00000161570,ENSG00000047249
TRUE	0.0351	58	1090	11	0.01	0.19	KEGG:05221	ke	65	Acute myeloid leukemia	1	ENSG00000133101,ENSG00000136997,ENSG00000157764,ENSG00000117020,ENSG00000173039,ENSG00000140464,ENSG00000213281,ENSG00000109320,ENSG00000141506,ENSG00000148737,ENSG00000245848
TRUE	0.0484	121	1090	17	0.016	0.14	KEGG:05146	ke	47	Amoebiasis	1	ENSG00000170542,ENSG00000197632,ENSG00000136244,ENSG00000232810,ENSG00000169429,ENSG00000163739,ENSG00000136634,ENSG00000125538,ENSG00000115594,ENSG00000173039,ENSG00000109320,ENSG00000108821,ENSG00000164400,ENSG00000113302,ENSG00000141506,ENSG00000166501,ENSG00000137462

## Sheet: INPUT-LIST
Ensembl Gene ID
ENSG00000211519
ENSG00000252714
ENSG00000225241
ENSG00000267034
ENSG00000267520
ENSG00000163121
ENSG00000233834
ENSG00000148481
ENSG00000264885
ENSG00000230997
ENSG00000117036
ENSG00000263535
ENSG00000203446
ENSG00000232457
ENSG00000185909
ENSG00000179978
ENSG00000232956
ENSG00000026751
ENSG00000115009
ENSG00000253522
ENSG00000239213
ENSG00000163082
ENSG00000242048
ENSG00000162290
ENSG00000165997
ENSG00000105993
ENSG00000172493
ENSG00000251136
ENSG00000134802
ENSG00000254281
ENSG00000138642
ENSG00000138646
ENSG00000138640
ENSG00000139289
ENSG00000132510
ENSG00000110047
ENSG00000259758
ENSG00000170542
ENSG00000175183
ENSG00000165891
ENSG00000154310
ENSG00000260196
ENSG00000164181
ENSG00000075651
ENSG00000075420
ENSG00000115956
ENSG00000119487
ENSG00000197142
ENSG00000198380
ENSG00000050730
ENSG00000148158
ENSG00000232702
ENSG00000078804
ENSG00000173451
ENSG00000080371
ENSG00000153317
ENSG00000233381
ENSG00000180340
ENSG00000180233
ENSG00000151327
ENSG00000155629
ENSG00000169155
ENSG00000144655
ENSG00000179362
ENSG00000197329
ENSG00000100906
ENSG00000114784
ENSG00000158050
ENSG00000164292
ENSG00000140379
ENSG00000234883
ENSG00000102580
ENSG00000101384
ENSG00000215458
ENSG00000114315
ENSG00000133657
ENSG00000119231
ENSG00000168246
ENSG00000120129
ENSG00000258555
ENSG00000128271
ENSG00000100024
ENSG00000003393
ENSG00000102804
ENSG00000023909
ENSG00000101654
ENSG00000213846
ENSG00000117525
ENSG00000171223
ENSG00000261827
ENSG00000186480
ENSG00000112096
ENSG00000106462
ENSG00000146457
ENSG00000166197
ENSG00000077150
ENSG00000133101
ENSG00000075426
ENSG00000085511
ENSG00000143514
ENSG00000236739
ENSG00000134061
ENSG00000157557
ENSG00000071073
ENSG00000269605
ENSG00000196839
ENSG00000122641
ENSG00000100139
ENSG00000164543
ENSG00000185022
ENSG00000215301
ENSG00000139496
ENSG00000254612
ENSG00000111335
ENSG00000188372
ENSG00000116962
ENSG00000131669
ENSG00000146707
ENSG00000117009
ENSG00000176834
ENSG00000152484
ENSG00000125657
ENSG00000178726
ENSG00000055332
ENSG00000205726
ENSG00000145569
ENSG00000261128
ENSG00000125733
ENSG00000075223
ENSG00000135114
ENSG00000089041
ENSG00000115652
ENSG00000139514
ENSG00000145555
ENSG00000169184
ENSG00000141682
ENSG00000110077
ENSG00000126003
ENSG00000137331
ENSG00000197632
ENSG00000166401
ENSG00000136244
ENSG00000037897
ENSG00000259075
ENSG00000257594
ENSG00000070961
ENSG00000150637
ENSG00000099985
ENSG00000176915
ENSG00000138035
ENSG00000148450
ENSG00000251230
ENSG00000196387
ENSG00000134108
ENSG00000232810
ENSG00000226137
ENSG00000148459
ENSG00000162924
ENSG00000117143
ENSG00000120539
ENSG00000197965
ENSG00000213614
ENSG00000104885
ENSG00000135870
ENSG00000257027
ENSG00000123908
ENSG00000131389
ENSG00000143322
ENSG00000135821
ENSG00000022567
ENSG00000184979
ENSG00000073756
ENSG00000107937
ENSG00000109756
ENSG00000049249
ENSG00000169429
ENSG00000124875
ENSG00000163739
ENSG00000158615
ENSG00000163734
ENSG00000081041
ENSG00000108932
ENSG00000160285
ENSG00000113811
ENSG00000147443
ENSG00000124882
ENSG00000171621
ENSG00000109321
ENSG00000205595
ENSG00000114251
ENSG00000235878
ENSG00000163602
ENSG00000163605
ENSG00000102794
ENSG00000165801
ENSG00000143479
ENSG00000136634
ENSG00000089351
ENSG00000164949
ENSG00000147883
ENSG00000256515
ENSG00000181381
ENSG00000123689
ENSG00000137267
ENSG00000117597
ENSG00000120910
ENSG00000188211
ENSG00000173846
ENSG00000085721
ENSG00000222009
ENSG00000143067
ENSG00000169248
ENSG00000094880
ENSG00000137266
ENSG00000100664
ENSG00000011007
ENSG00000026508
ENSG00000073712
ENSG00000135476
ENSG00000080822
ENSG00000123610
ENSG00000168374
ENSG00000205021
ENSG00000038210
ENSG00000147454
ENSG00000215298
ENSG00000167034
ENSG00000103257
ENSG00000168884
ENSG00000166920
ENSG00000138018
ENSG00000128590
ENSG00000169504
ENSG00000182782
ENSG00000255398
ENSG00000213494
ENSG00000114770
ENSG00000163870
ENSG00000145779
ENSG00000249437
ENSG00000011422
ENSG00000179431
ENSG00000108688
ENSG00000134470
ENSG00000034152
ENSG00000115008
ENSG00000006652
ENSG00000125538
ENSG00000139146
ENSG00000136688
ENSG00000107968
ENSG00000140830
ENSG00000087074
ENSG00000165732
ENSG00000107201
ENSG00000164603
ENSG00000161574
ENSG00000125430
ENSG00000149557
ENSG00000188419
ENSG00000170525
ENSG00000144802
ENSG00000162433
ENSG00000116675
ENSG00000170017
ENSG00000106366
ENSG00000267596
ENSG00000115084
ENSG00000013375
ENSG00000010295
ENSG00000124496
ENSG00000187479
ENSG00000133961
ENSG00000155324
ENSG00000155304
ENSG00000105976
ENSG00000163874
ENSG00000137757
ENSG00000115107
ENSG00000142961
ENSG00000166128
ENSG00000176170
ENSG00000159658
ENSG00000076351
ENSG00000163659
ENSG00000150977
ENSG00000178860
ENSG00000154640
ENSG00000188549
ENSG00000165424
ENSG00000196449
ENSG00000197982
ENSG00000188786
ENSG00000187608
ENSG00000151726
ENSG00000105825
ENSG00000186827
ENSG00000163661
ENSG00000226479
ENSG00000188483
ENSG00000112245
ENSG00000155096
ENSG00000104064
ENSG00000006075
ENSG00000056558
ENSG00000095951
ENSG00000184557
ENSG00000256235
ENSG00000269636
ENSG00000147650
ENSG00000145901
ENSG00000134326
ENSG00000134602
ENSG00000129277
ENSG00000134321
ENSG00000173575
ENSG00000123728
ENSG00000004799
ENSG00000095794
ENSG00000175352
ENSG00000164683
ENSG00000008294
ENSG00000134070
ENSG00000188060
ENSG00000119139
ENSG00000112149
ENSG00000205189
ENSG00000119900
ENSG00000107771
ENSG00000168389
ENSG00000176142
ENSG00000115267
ENSG00000181649
ENSG00000162616
ENSG00000229644
ENSG00000151693
ENSG00000124788
ENSG00000121594
ENSG00000069956
ENSG00000137965
ENSG00000215019
ENSG00000119508
ENSG00000167460
ENSG00000137710
ENSG00000107104
ENSG00000075240
ENSG00000148926
ENSG00000144840
ENSG00000133805
ENSG00000123342
ENSG00000155329
ENSG00000168209
ENSG00000151694
ENSG00000102921
ENSG00000118503
ENSG00000119138
ENSG00000101187
ENSG00000198355
ENSG00000137393
ENSG00000066697
ENSG00000104312
ENSG00000060982
ENSG00000164823
ENSG00000104320
ENSG00000124813
ENSG00000154099
ENSG00000105835
ENSG00000181704
ENSG00000128641
ENSG00000105855
ENSG00000171522
ENSG00000113282
ENSG00000113580
ENSG00000090339
ENSG00000100580
ENSG00000013619
ENSG00000119922
ENSG00000081320
ENSG00000119917
ENSG00000185745
ENSG00000152778
ENSG00000173391
ENSG00000105939
ENSG00000118689
ENSG00000003402
ENSG00000199179
ENSG00000264501
ENSG00000172965
ENSG00000147324
ENSG00000244567
ENSG00000222041
ENSG00000122257
ENSG00000248780
ENSG00000162734
ENSG00000234456
ENSG00000230551
ENSG00000231989
ENSG00000026025
ENSG00000236686
ENSG00000108510
ENSG00000248394
ENSG00000198406
ENSG00000247516
ENSG00000144580
ENSG00000055208
ENSG00000140406
ENSG00000217060
ENSG00000172183
ENSG00000262742
ENSG00000115946
ENSG00000174799
ENSG00000196792
ENSG00000251194
ENSG00000184313
ENSG00000243725
ENSG00000136997
ENSG00000157654
ENSG00000241978
ENSG00000186432
ENSG00000198604
ENSG00000226268
ENSG00000010818
ENSG00000247400
ENSG00000138709
ENSG00000113369
ENSG00000175471
ENSG00000118496
ENSG00000126814
ENSG00000121797
ENSG00000089048
ENSG00000184203
ENSG00000151012
ENSG00000151014
ENSG00000162645
ENSG00000197147
ENSG00000183722
ENSG00000176014
ENSG00000120688
ENSG00000183486
ENSG00000157601
ENSG00000157764
ENSG00000109436
ENSG00000006530
ENSG00000173276
ENSG00000113742
ENSG00000164136
ENSG00000179630
ENSG00000177150
ENSG00000048162
ENSG00000177426
ENSG00000224080
ENSG00000139597
ENSG00000101782
ENSG00000118257
ENSG00000197122
ENSG00000157212
ENSG00000118242
ENSG00000154813
ENSG00000131378
ENSG00000162772
ENSG00000136643
ENSG00000105246
ENSG00000173674
ENSG00000177189
ENSG00000067533
ENSG00000005889
ENSG00000162909
ENSG00000130222
ENSG00000006451
ENSG00000090376
ENSG00000116574
ENSG00000124145
ENSG00000163512
ENSG00000132530
ENSG00000111331
ENSG00000077585
ENSG00000147050
ENSG00000147119
ENSG00000117020
ENSG00000102218
ENSG00000162711
ENSG00000115594
ENSG00000138166
ENSG00000163539
ENSG00000236698
ENSG00000164211
ENSG00000110048
ENSG00000135124
ENSG00000218996
ENSG00000171456
ENSG00000152503
ENSG00000133773
ENSG00000110218
ENSG00000139725
ENSG00000011114
ENSG00000173039
ENSG00000130340
ENSG00000196371
ENSG00000111186
ENSG00000175592
ENSG00000176845
ENSG00000138041
ENSG00000186594
ENSG00000166347
ENSG00000078747
ENSG00000076053
ENSG00000266709
ENSG00000106701
ENSG00000165312
ENSG00000111142
ENSG00000112081
ENSG00000136754
ENSG00000152684
ENSG00000136147
ENSG00000117475
ENSG00000119326
ENSG00000141380
ENSG00000256594
ENSG00000146592
ENSG00000135842
ENSG00000140464
ENSG00000116711
ENSG00000163376
ENSG00000090104
ENSG00000134371
ENSG00000118197
ENSG00000118200
ENSG00000154359
ENSG00000052795
ENSG00000155893
ENSG00000184602
ENSG00000104213
ENSG00000102554
ENSG00000145414
ENSG00000108771
ENSG00000198498
ENSG00000156011
ENSG00000151748
ENSG00000163738
ENSG00000171612
ENSG00000067082
ENSG00000142224
ENSG00000162892
ENSG00000144597
ENSG00000213281
ENSG00000196352
ENSG00000054523
ENSG00000137628
ENSG00000123700
ENSG00000116815
ENSG00000116514
ENSG00000108582
ENSG00000175040
ENSG00000103569
ENSG00000131263
ENSG00000177606
ENSG00000185215
ENSG00000138821
ENSG00000109320
ENSG00000175895
ENSG00000180628
ENSG00000106952
ENSG00000041982
ENSG00000080345
ENSG00000116560
ENSG00000174840
ENSG00000166165
ENSG00000083290
ENSG00000197045
ENSG00000023445
ENSG00000131979
ENSG00000184886
ENSG00000160326
ENSG00000152229
ENSG00000104783
ENSG00000108691
ENSG00000108700
ENSG00000091436
ENSG00000198839
ENSG00000124731
ENSG00000162493
ENSG00000196116
ENSG00000242629
ENSG00000136689
ENSG00000163297
ENSG00000166750
ENSG00000188375
ENSG00000092199
ENSG00000080815
ENSG00000100418
ENSG00000108821
ENSG00000132475
ENSG00000122862
ENSG00000101966
ENSG00000065911
ENSG00000184588
ENSG00000087470
ENSG00000124201
ENSG00000138670
ENSG00000153234
ENSG00000158470
ENSG00000115091
ENSG00000137801
ENSG00000120875
ENSG00000171681
ENSG00000083312
ENSG00000104695
ENSG00000074935
ENSG00000103642
ENSG00000205413
ENSG00000143384
ENSG00000183484
ENSG00000137752
ENSG00000242247
ENSG00000186187
ENSG00000113070
ENSG00000173145
ENSG00000121892
ENSG00000155130
ENSG00000074660
ENSG00000008394
ENSG00000155158
ENSG00000108239
ENSG00000105829
ENSG00000146676
ENSG00000134594
ENSG00000136286
ENSG00000164023
ENSG00000116095
ENSG00000042286
ENSG00000117758
ENSG00000079332
ENSG00000164933
ENSG00000071243
ENSG00000124225
ENSG00000139572
ENSG00000115738
ENSG00000121579
ENSG00000107130
ENSG00000164400
ENSG00000184014
ENSG00000014824
ENSG00000122644
ENSG00000166471
ENSG00000136048
ENSG00000205339
ENSG00000146278
ENSG00000138434
ENSG00000138594
ENSG00000140450
ENSG00000137959
ENSG00000198833
ENSG00000136514
ENSG00000111711
ENSG00000149289
ENSG00000163002
ENSG00000108342
ENSG00000134330
ENSG00000183696
ENSG00000174485
ENSG00000137449
ENSG00000167721
ENSG00000128989
ENSG00000003436
ENSG00000165474
ENSG00000167004
ENSG00000107443
ENSG00000156273
ENSG00000173262
ENSG00000110713
ENSG00000164758
ENSG00000059804
ENSG00000251349
ENSG00000127124
ENSG00000146776
ENSG00000119048
ENSG00000241697
ENSG00000004468
ENSG00000131871
ENSG00000166523
ENSG00000138386
ENSG00000127561
ENSG00000104131
ENSG00000132603
ENSG00000176148
ENSG00000186431
ENSG00000138378
ENSG00000130589
ENSG00000105849
ENSG00000107249
ENSG00000150782
ENSG00000181019
ENSG00000136052
ENSG00000173559
ENSG00000145860
ENSG00000156535
ENSG00000112249
ENSG00000113302
ENSG00000091140
ENSG00000150787
ENSG00000185507
ENSG00000141506
ENSG00000115919
ENSG00000064763
ENSG00000115520
ENSG00000121989
ENSG00000120217
ENSG00000082153
ENSG00000043462
ENSG00000006459
ENSG00000197872
ENSG00000200463
ENSG00000197989
ENSG00000269614
ENSG00000225492
ENSG00000160551
ENSG00000213080
ENSG00000234148
ENSG00000204253
ENSG00000230756
ENSG00000260941
ENSG00000232742
ENSG00000180672
ENSG00000215861
ENSG00000256309
ENSG00000166501
ENSG00000258568
ENSG00000240445
ENSG00000231389
ENSG00000197291
ENSG00000251442
ENSG00000132704
ENSG00000261882
ENSG00000224113
ENSG00000228434
ENSG00000117090
ENSG00000153823
ENSG00000261899
ENSG00000116106
ENSG00000182372
ENSG00000123983
ENSG00000213492
ENSG00000197780
ENSG00000079308
ENSG00000248791
ENSG00000111961
ENSG00000131015
ENSG00000119986
ENSG00000118762
ENSG00000163644
ENSG00000151247
ENSG00000139278
ENSG00000047634
ENSG00000100441
ENSG00000173698
ENSG00000198369
ENSG00000254765
ENSG00000122643
ENSG00000044574
ENSG00000259207
ENSG00000230259
ENSG00000121858
ENSG00000232757
ENSG00000167693
ENSG00000171109
ENSG00000164111
ENSG00000148737
ENSG00000133858
ENSG00000231607
ENSG00000123091
ENSG00000187720
ENSG00000104419
ENSG00000258790
ENSG00000100902
ENSG00000081189
ENSG00000162378
ENSG00000245532
ENSG00000103888
ENSG00000065150
ENSG00000153898
ENSG00000164086
ENSG00000125871
ENSG00000097033
ENSG00000117226
ENSG00000117228
ENSG00000154451
ENSG00000132669
ENSG00000215414
ENSG00000237984
ENSG00000178723
ENSG00000174405
ENSG00000010322
ENSG00000102760
ENSG00000133106
ENSG00000159200
ENSG00000073910
ENSG00000137936
ENSG00000138439
ENSG00000237357
ENSG00000204802
ENSG00000106615
ENSG00000101773
ENSG00000226007
ENSG00000259419
ENSG00000173166
ENSG00000170161
ENSG00000082397
ENSG00000110395
ENSG00000240907
ENSG00000241190
ENSG00000234394
ENSG00000137491
ENSG00000174469
ENSG00000227917
ENSG00000255856
ENSG00000135655
ENSG00000102172
ENSG00000206418
ENSG00000146094
ENSG00000111490
ENSG00000065883
ENSG00000165030
ENSG00000170142
ENSG00000254806
ENSG00000244274
ENSG00000165874
ENSG00000152689
ENSG00000089127
ENSG00000229927
ENSG00000189014
ENSG00000226964
ENSG00000150938
ENSG00000149269
ENSG00000124479
ENSG00000203668
ENSG00000263276
ENSG00000128383
ENSG00000035687
ENSG00000127947
ENSG00000166881
ENSG00000123892
ENSG00000081923
ENSG00000049759
ENSG00000105650
ENSG00000135218
ENSG00000145777
ENSG00000091106
ENSG00000171105
ENSG00000119906
ENSG00000101367
ENSG00000166396
ENSG00000188613
ENSG00000165029
ENSG00000128342
ENSG00000143622
ENSG00000112972
ENSG00000137462
ENSG00000198825
ENSG00000107338
ENSG00000112078
ENSG00000105928
ENSG00000124762
ENSG00000139344
ENSG00000146192
ENSG00000179583
ENSG00000162745
ENSG00000142178
ENSG00000172939
ENSG00000172070
ENSG00000234516
ENSG00000086300
ENSG00000136169
ENSG00000117479
ENSG00000115464
ENSG00000178996
ENSG00000177663
ENSG00000015475
ENSG00000160886
ENSG00000158234
ENSG00000163378
ENSG00000144747
ENSG00000168282
ENSG00000184371
ENSG00000184226
ENSG00000185338
ENSG00000173638
ENSG00000134375
ENSG00000155975
ENSG00000121933
ENSG00000049245
ENSG00000145416
ENSG00000114127
ENSG00000175445
ENSG00000103381
ENSG00000076928
ENSG00000245848
ENSG00000187134
ENSG00000168476
ENSG00000123836
ENSG00000151632
ENSG00000156675
ENSG00000087053
ENSG00000134247
ENSG00000125384
ENSG00000184060
ENSG00000164221
ENSG00000169245
ENSG00000188313
ENSG00000158122
ENSG00000186074
ENSG00000147535
ENSG00000117318
ENSG00000099246
ENSG00000078081
ENSG00000084733
ENSG00000148677
ENSG00000178104
ENSG00000181634
ENSG00000177000
ENSG00000113657
ENSG00000243064
ENSG00000076984
ENSG00000180767
ENSG00000153208
ENSG00000137767
ENSG00000110436
ENSG00000120162
ENSG00000105509
ENSG00000120705
ENSG00000197321
ENSG00000137673
ENSG00000108702
ENSG00000184838
ENSG00000074416
ENSG00000102317
ENSG00000138756
ENSG00000243649
ENSG00000169495
ENSG00000152804
ENSG00000134460
ENSG00000079950
ENSG00000122986
ENSG00000244255
ENSG00000138119
ENSG00000136240
ENSG00000136861
ENSG00000139132
ENSG00000181631
ENSG00000064652
ENSG00000151914
ENSG00000181467
ENSG00000070367
ENSG00000161570
ENSG00000131203
ENSG00000105967
ENSG00000206560
ENSG00000010810
ENSG00000182511
ENSG00000167236
ENSG00000155307
ENSG00000177409
ENSG00000151490
ENSG00000006074
ENSG00000153283
ENSG00000168685
ENSG00000130844
ENSG00000103528
ENSG00000133246
ENSG00000079156
ENSG00000119729
ENSG00000188906
ENSG00000111358
ENSG00000176022
ENSG00000066557
ENSG00000000938
ENSG00000126947
ENSG00000132405
ENSG00000163694
ENSG00000126709
ENSG00000164929
ENSG00000205269
ENSG00000164932
ENSG00000017260
ENSG00000185432
ENSG00000110911
ENSG00000124209
ENSG00000180304
ENSG00000187231
ENSG00000185222
ENSG00000093183
ENSG00000151702
ENSG00000267824
ENSG00000196961
ENSG00000044459
ENSG00000110717
ENSG00000120457
ENSG00000116990
ENSG00000178573
ENSG00000072736
ENSG00000006453
ENSG00000107738
ENSG00000136273
ENSG00000135525
ENSG00000148943
ENSG00000133812
ENSG00000103066
ENSG00000112715
ENSG00000185015
ENSG00000137714
ENSG00000138448
ENSG00000196639
ENSG00000106246
ENSG00000104447
ENSG00000139163
ENSG00000047249
ENSG00000163406
ENSG00000127527
ENSG00000095585
ENSG00000111912
ENSG00000171862
ENSG00000095303
ENSG00000101888
ENSG00000068366
ENSG00000118308
ENSG00000073737
ENSG00000111729
ENSG00000082074
ENSG00000115419
ENSG00000132846
ENSG00000179029
ENSG00000123095
ENSG00000153071
ENSG00000004846
ENSG00000251380
ENSG00000255833
ENSG00000107798
ENSG00000110848
ENSG00000085514
ENSG00000170915
ENSG00000128262
ENSG00000264451
ENSG00000253203
ENSG00000066294
ENSG00000253816
ENSG00000253333
ENSG00000196302
ENSG00000235558
ENSG00000161103
ENSG00000197210
ENSG00000103522
ENSG00000168061
ENSG00000185829
ENSG00000228609
ENSG00000220693
ENSG00000196664
ENSG00000145284
ENSG00000261487
ENSG00000228696
ENSG00000269038
ENSG00000121807
ENSG00000172264
ENSG00000196584
ENSG00000137502
ENSG00000171659
ENSG00000109861
ENSG00000139508
ENSG00000019991
ENSG00000153165
ENSG00000151612
ENSG00000165323
ENSG00000015568
ENSG00000164649
ENSG00000196092
ENSG00000111144
ENSG00000174282
ENSG00000007312
ENSG00000143110
ENSG00000132000
ENSG00000153064
ENSG00000183054
ENSG00000170190
ENSG00000125630
ENSG00000125703
ENSG00000124782
ENSG00000100403
ENSG00000136542
ENSG00000170949
ENSG00000175938
ENSG00000154639
ENSG00000130560
ENSG00000156050
ENSG00000006007
ENSG00000148411
ENSG00000103490
ENSG00000132386
ENSG00000082438
ENSG00000110777
ENSG00000127526
ENSG00000065413
ENSG00000172243

## Sheet: SI_TB6way
	gprofiler	InnateDB	SIGORA	DAVID	GSEA	AF	mean rank	median rank	minimum rank
Cytokine-cytokine receptor interaction	1	2	1	1	12	15	5.33333	1.5	1
NOD-like receptor signaling pathway	2	1	2	2	20	21	8	2	1
MAPK signaling pathway	20	10	3		8		10.25	9	3
RIG-I-like receptor signaling pathway	21	14	4		2	29	14	14	2
Hepatitis C		22	5				13.5	13.5	5
B cell receptor signaling pathway	22	16	6				14.6667	16	6
Toll-like receptor signaling pathway	3	3	7	3	10	19	7.5	5	3
Jak-STAT signaling pathway	16	11	8		4	41	16	11	4
Osteoclast differentiation	17	6	9				10.6667	9	6
Fc gamma R-mediated phagocytosis			10				10	10	10
ErbB signaling pathway	14	18	11		30		18.25	16	11
Amoebiasis	27	19	12				19.3333	19	12
Small cell lung cancer		24			1	7	10.6667	7	1
Bladder cancer					21	1	11	11	1
Prostate cancer					16	2	9	9	2
Thyroid cancer					33	3	18	18	3
Pathways in cancer	24	20			3		15.6667	20	3
Chemokine signaling pathway	4	5		4	26	46	17	5	4
Hypertrophic cardiomyopathy (hcm)					5	4	4.5	4.5	4
Malaria	11	4					7.5	7.5	4
Influenza A	5						5	5	5
P53 signaling pathway					25	5	15	15	5
Amyotrophic lateral sclerosis als						6	6	6	6
Legionellosis	6						6	6	6
Prion diseases					6	12	9	9	6
Transcriptional misregulation in cancer	7						7	7	7
Chagas disease (American trypanosomiasis)	10	7					8.5	8.5	7
Notch signaling pathway					7	14	10.5	10.5	7
Salmonella infection	8						8	8	8
Apoptosis	13	8			15	16	13	14	8
Hematopoietic cell lineage		21			14	8	14.3333	14	8
NF-kappa B signaling pathway	9						9	9	9
Cytosolic DNA-sensing pathway	18	9			9	11	11.75	10	9
Complement and coagulation cascades					28	9	18.5	18.5	9
VEGF signaling pathway					18	10	14	14	10
TGF beta signaling pathway					11	17	14	14	11
Measles	12						12	12	12
Leishmaniasis		12			44	60	38.6667	44	12
Basal transcription factors					13		13	13	13
African trypanosomiasis		13					13	13	13
Adipo cytokine signaling pathway		26			31	13	23.3333	26	13
Hepatitis B	15						15	15	15
T cell receptor signaling pathway	19	15			32	28	23.5	23.5	15
Focal adhesion					17		17	17	17
Epithelial cell signaling in Helicobacter pylori infection	25	17			35	25	25.5	25	17
Neurotrophin signaling pathway					19	18	18.5	18.5	18
Acute myeloid leukemia	26	23			47	20	29	24.5	20
Type I diabetes mellitus					22	23	22.5	22.5	22
Endometrial cancer					34	22	28	28	22
Rheumatoid arthritis	23						23	23	23
Fc epsilon ri signaling pathway					23	59	41	41	23
ECM receptor interaction						24	24	24	24
O glycan biosynthesis					24	72	48	48	24
Toxoplasmosis		25					25	25	25
Dilated cardiomyopathy					51	26	38.5	38.5	26
Chronic myeloid leukemia						27	27	27	27
MTOR signaling pathway		27			55	30	37.3333	30	27
Graft versus host disease					27	49	38	38	27
Asthma					29	34	31.5	31.5	29
Pancreatic cancer						31	31	31	31
Fatty acid metabolism						32	32	32	32
Tryptophan metabolism						33	33	33	33
Viral myocarditis					53	35	44	44	35
Valine leucine and isoleucine biosynthesis						36	36	36	36
Folate biosynthesis					36		36	36	36
Endocytosis					37		37	37	37
Alpha linolenic acid metabolism					52	37	44.5	44.5	37
Intestinal immune network for IGa production					46	38	42	42	38
Glioma					38	57	47.5	47.5	38
Cell adhesion molecules (CAMs)						39	39	39	39
Tight junction					39	64	51.5	51.5	39
Gnrh signaling pathway					40		40	40	40
Renal cell carcinoma					42	40	41	41	40
Type II diabetes mellitus					41		41	41	41
Ether lipid metabolism					54	42	48	48	42
Sphingolipid metabolism					49	43	46	46	43
Natural killer cell mediated cytotoxicity					43	63	53	53	43
Pantothenate and coa biosynthesis						44	44	44	44
Vibrio cholerae infection						45	45	45	45
Systemic lupus erythematosus					45	52	48.5	48.5	45
Colorectal cancer						47	47	47	47
Allograft rejection					48	53	50.5	50.5	48
Protein export						48	48	48	48
Glyoxylate and dicarboxylate metabolism						50	50	50	50
Glycosylphosphatidylinositol gpi anchor biosynthesis					50	61	55.5	55.5	50
Ubiquitin mediated proteolysis					57	51	54	54	51
Non small cell lung cancer						54	54	54	54
Glycerolipidmetabolism						55	55	55	55
Wnt signaling pathway						56	56	56	56
PPAR signaling pathway					56	73	64.5	64.5	56
RNA degradation						58	58	58	58
Spliceosome						62	62	62	62
Homologous recombination						65	65	65	65
Arrhythmogenic right ventricular cardiomyopathy (ARVC)						66	66	66	66
Insulin signaling pathway						67	67	67	67
Pathogenic escherichia coli infection						68	68	68	68
Glycerophospholipid metabolism						69	69	69	69
Antigen processing and presentation						70	70	70	70
Progesterone mediated oocyte maturation						71	71	71	71
Proteasome						74	74	74	74

## Sheet: DAVID_functional_clusters
Annotation Cluster 1 Enrichment Score: 0.9989538522990948
Category Term Count % PValue Genes List Total Pop Hits Pop Total Fold Enrichment Bonferroni Benjamini FDR
KEGG_PATHWAY hsa04012:ErbB signaling pathway 16 1.6376663254861823 4.7100866287206353E-4 ENSG00000117020, ENSG00000136997, ENSG00000205595, ENSG00000157764, ENSG00000197122, ENSG00000149269, ENSG00000141506, ENSG00000143322, ENSG00000076984, ENSG00000177606, ENSG00000124882, ENSG00000213281, ENSG00000166501, ENSG00000109321, ENSG00000124762, ENSG00000113070, ENSG00000110395 336 87 5085 2.78325123…
KEGG_PATHWAY hsa05221:Acute myeloid leukemia 10 1.023541453428864 0.012657579821710575 ENSG00000117020, ENSG00000136997, ENSG00000140464, ENSG00000148737, ENSG00000213281, ENSG00000109320, ENSG00000157764, ENSG00000133101, ENSG00000141506, ENSG00000173039 336 58 5085 2.60929802955665 0.8777675792034172 0.11629953581529073 14.326144128138163
KEGG_PATHWAY hsa05215:Prostate cancer 12 1.2282497441146365 0.030805229806438097 ENSG00000100906, ENSG00000117020, ENSG00000146592, ENSG00000167034, ENSG00000148737, ENSG00000213281, ENSG00000109320, ENSG00000157764, ENSG00000124762, ENSG00000171862, ENSG00000141506, ENSG00000173039 336 89 5085 2.0405296950240768 0.9942743442780464 0.21795854889245225 31.60048069879593
KEGG_PATHWAY hsa04722:Neurotrophin signaling pathway 15 1.5353121801432956 0.03239970460665548 ENSG00000117020, ENSG00000100906, ENSG00000080815, ENSG00000090376, ENSG00000157764, ENSG00000141506, ENSG00000173039, ENSG00000076984, ENSG00000177606, ENSG00000134070, ENSG00000104312, ENSG00000118689, ENSG00000213281, ENSG00000177189, ENSG00000109320 336 124 5085 1.8307171658986177 0.9956364623748057…
KEGG_PATHWAY hsa05213:Endometrial cancer 8 0.8188331627430911 0.052414263186406934 ENSG00000117020, ENSG00000136997, ENSG00000148737, ENSG00000213281, ENSG00000118689, ENSG00000157764, ENSG00000171862, ENSG00000141506 336 52 5085 2.328296703296703 0.9998613068596099 0.3093591046710499 47.97789412182583
KEGG_PATHWAY hsa05220:Chronic myeloid leukemia 10 1.023541453428864 0.05641166288970721 ENSG00000100906, ENSG00000117020, ENSG00000136997, ENSG00000213281, ENSG00000109320, ENSG00000157764, ENSG00000124762, ENSG00000141506, ENSG00000173039, ENSG00000110395 336 75 5085 2.017857142857143 0.9999309564505166 0.3082227533553775 50.58002045816463
KEGG_PATHWAY hsa05211:Renal cell carcinoma 9 0.9211873080859775 0.0874611710233609 ENSG00000117020, ENSG00000177606, ENSG00000105976, ENSG00000112715, ENSG00000213281, ENSG00000157764, ENSG00000149269, ENSG00000141506, ENSG00000019991 336 70 5085 1.9457908163265305 0.9999997236412375 0.38562346446805096 67.07559081356197
KEGG_PATHWAY hsa05218:Melanoma 8 0.8188331627430911 0.18475836155322373 ENSG00000117020, ENSG00000105976, ENSG00000213281, ENSG00000157764, ENSG00000124762, ENSG00000171862, ENSG00000141506, ENSG00000019991 336 71 5085 1.70523138832998 0.9999999999999977 0.618250460390623 91.62152665393873
KEGG_PATHWAY hsa05212:Pancreatic cancer 8 0.8188331627430911 0.19396999114760977 ENSG00000117020, ENSG00000006451, ENSG00000075651, ENSG00000112715, ENSG00000109320, ENSG00000157764, ENSG00000141506, ENSG00000173039 336 72 5085 1.681547619047619 0.9999999999999997 0.6277999868648032 92.70104758287687
KEGG_PATHWAY hsa05214:Glioma 7 0.7164790174002047 0.23302672210587924 ENSG00000117020, ENSG00000166501, ENSG00000213281, ENSG00000157764, ENSG00000124762, ENSG00000171862, ENSG00000141506 336 63 5085 1.681547619047619 1.0 0.6839879500592627 96.00584437684229
KEGG_PATHWAY hsa05223:Non-small cell lung cancer 6 0.6141248720573182 0.2819242252029755 ENSG00000117020, ENSG00000166501, ENSG00000213281, ENSG00000118689, ENSG00000157764, ENSG00000141506 336 54 5085 1.681547619047619 1.0 0.7362617865809992 98.20465461177042
KEGG_PATHWAY hsa05216:Thyroid cancer 4 0.4094165813715456 0.2980484897595861 ENSG00000136997, ENSG00000148737, ENSG00000213281, ENSG00000157764 336 29 5085 2.08743842364532 1.0 0.7347522718666183 98.6372200598837
KEGG_PATHWAY hsa05210:Colorectal cancer 8 0.8188331627430911 0.3159648070959702 ENSG00000117020, ENSG00000136997, ENSG00000177606, ENSG00000105976, ENSG00000148737, ENSG00000180340, ENSG00000157764, ENSG00000141506 336 84 5085 1.441326530612245 1.0 0.7515221752684497 99.00429995757762
KEGG_PATHWAY hsa04720:Long-term potentiation 5 0.511770726714432 0.6645346741971494 ENSG00000120910, ENSG00000166501, ENSG00000177189, ENSG00000213281, ENSG00000157764 336 68 5085 1.1127888655462186 1.0 0.9375007548451048 99.99982535478212
KEGG_PATHWAY hsa04730:Long-term depression 5 0.511770726714432 0.675847919296564 ENSG00000166501, ENSG00000213281, ENSG00000157764, ENSG00000116711, ENSG00000104695 336 69 5085 1.0966614906832297 1.0 0.9350100225837079 99.9998848378068
KEGG_PATHWAY hsa04914:Progesterone-mediated oocyte maturation 6 0.6141248720573182 0.6782512132675539 ENSG00000117020, ENSG00000094880, ENSG00000177189, ENSG00000157764, ENSG00000133101, ENSG00000141506 336 86 5085 1.0558554817275747 1.0 0.9335762998253124 99.9998947844026
Annotation Cluster 2 Enrichment Score: 0.8667733552056401
Category Term Count % PValue Genes List Total Pop Hits Pop Total Fold Enrichment Bonferroni Benjamini FDR
KEGG_PATHWAY hsa04920:Adipocytokine signaling pathway 10 1.023541453428864 0.030298802910962676 ENSG00000100906, ENSG00000135218, ENSG00000117020, ENSG00000123983, ENSG00000184557, ENSG00000151726, ENSG00000197142, ENSG00000068366, ENSG00000109320, ENSG00000173039 336 67 5085 2.2587953091684434 0.9937589345401203 0.2241764884380495 31.165388075146105
KEGG_PATHWAY hsa03320:PPAR signaling pathway 8 0.8188331627430911 0.16690752060457803 ENSG00000135218, ENSG00000123983, ENSG00000175445, ENSG00000151726, ENSG00000197142, ENSG00000068366, ENSG00000173391, ENSG00000145284 336 69 5085 1.7546583850931676 0.9999999999999178 0.5877802149656568 89.10195920011505
KEGG_PATHWAY hsa00071:Fatty acid metabolism 4 0.4094165813715456 0.49633917957215157 ENSG00000123983, ENSG00000151726, ENSG00000197142, ENSG00000068366 336 40 5085 1.513392857142857 1.0 0.8483368878284097 99.97576426562614
